# Supplementary material for: A geminal antimony( iii )/phosphorus( iii ) frustrated Lewis pair
Source: Royal Society of Chemistry journal article supplement (doi:10.1039/d4sc02785j), 2024-01-01
Supplement: d4sc02785j1.pdf [file d4sc02785j1.pdf]

## Supporting Information

### **A Geminal Antimony(III)/Phosphorus(III) Frustrated Lewis Pair**

Jonas Kriefft, Pia C. Trapp, Yury V. Vishnevskiy, Beate Neumann, Hans-Georg Stammer, Jan-Hendrik Lamm and Norbert W. Mitzel\*

\*Corresponding Author.

Chair of Inorganic and Structural Chemistry, Center for Molecular Materials CM<sub>2</sub>

Faculty of Chemistry, Bielefeld University

Universitätsstraße 25, 33615 Bielefeld (Germany)

E-mail: mitzel@uni-bielefeld.de

## **Table of Contents**

Experimental Procedures

NMR Spectroscopy Data

IR Spectroscopy Data

Crystallographic Data

Quantum Chemical Calculations

References

## Experimental Procedures

### General Information

All operations with air- and moisture-sensitive substances were performed under conventional Schlenk techniques or in a glove box using argon as inert gas. Volatile compounds were handled in a vacuum line. All solvents (diethyl ether and *n*-pentane dried over LiAlH<sub>4</sub>, *n*-hexane, toluene, benzene-*d*<sub>6</sub> and toluene-*d*<sub>8</sub> dried over Na/K alloy, dichloromethane-*d*<sub>2</sub>, toluene-*d*<sub>8</sub>, benzene-*d*<sub>6</sub> and tetrachloromethane dried over molecular sieves) were distilled and degassed prior to use. (F<sub>5</sub>C<sub>2</sub>)<sub>2</sub>SbCl,<sup>1</sup> LiCH<sub>2</sub>P(*t*Bu)<sub>2</sub><sup>2</sup> and (MePPh<sub>2</sub>)AuCl<sup>3</sup> were prepared according to literature procedures. CS<sub>2</sub> (99.9 %, J. T. Baker) was dried over P<sub>4</sub>O<sub>10</sub>, distilled and degassed prior to use. SO<sub>2</sub> (99.98 %, Air Liquide), PhNCO (≥99.0 %, Sigma Aldrich), PhNCS (>99 %, fluorochem) and silver trifluoromethanesulfonate (99 %, fluorochem) were used without further purification. NMR spectra were recorded using Bruker Avance III 500 HD and Bruker Avance III 600 spectrometers at ambient temperature if not noted otherwise. NMR spectroscopic chemical shifts were referenced to the residual proton or carbon peaks of the solvent (CD<sub>2</sub>Cl<sub>2</sub>: <sup>1</sup>H: 5.32 ppm, <sup>13</sup>C: 54.0 ppm; C<sub>6</sub>D<sub>5</sub>(CD<sub>3</sub>): <sup>1</sup>H: 2.09 ppm (CD<sub>3</sub>), <sup>13</sup>C: 20.4 ppm (CD<sub>3</sub>), C<sub>6</sub>D<sub>6</sub>: <sup>1</sup>H: 7.16 ppm, <sup>13</sup>C: 128.1 ppm) or externally (<sup>15</sup>N: NH<sub>3</sub> (l), <sup>19</sup>F: CFCl<sub>3</sub>, <sup>31</sup>P: 85% H<sub>3</sub>PO<sub>4</sub> in H<sub>2</sub>O). Elemental analyses were carried out by a co-worker of the University of Bielefeld using a HEKATECH EURO Element Analyser. The elemental analyses were determined from samples of the isolated compounds. IR spectroscopic measurements were performed on a Bruker-Alpha-FT-IR spectrometer with a diamond crystal. SC-XRD was performed on a Rigaku Supernova diffractometer using Cu-Kα or Mo-Kα radiation.

### Syntheses

#### Synthesis of (F<sub>5</sub>C<sub>2</sub>)<sub>2</sub>SbCH<sub>2</sub>P(*t*Bu)<sub>2</sub> (**1**):

(Lithiomethyl)bis(*tert*-butyl)phosphane (1.58 g, 9.45 mmol) was suspended in diethyl ether (100 mL) and cooled to -78 °C. A solution of bis(pentafluoroethyl)chlorostibane (4.35 g, 8.93 mmol) and toluene in diethyl ether (50 mL) was added dropwise. The mixture was allowed to reach room temperature overnight to give a pale brown suspension. After removing the solvent under reduced pressure, *n*-pentane (50 mL) was added and the suspension was filtered inert. The solvent was removed from the filtrate under reduced pressure. Vacuum distillation (0.05 mbar, 55 °C) yielded (F<sub>5</sub>C<sub>2</sub>)<sub>2</sub>SbCH<sub>2</sub>P(*t*Bu)<sub>2</sub> (**1**, 2.46 g, 4.74 mmol, 53 %) as a colourless liquid.

#### Analytical data:

<sup>1</sup>H NMR (600 MHz, CD<sub>2</sub>Cl<sub>2</sub>): δ [ppm] = 2.17 (d, <sup>2</sup>J<sub>P,H</sub> = 1 Hz, 2H, CH<sub>2</sub>), 1.17 (d, <sup>3</sup>J<sub>P,H</sub> = 11 Hz, 18H, C(CH<sub>3</sub>)<sub>3</sub>).

<sup>13</sup>C{<sup>1</sup>H} NMR (151 MHz, CD<sub>2</sub>Cl<sub>2</sub>): δ [ppm] = 122.0 (m, <sup>1</sup>J<sub>F,C</sub> = 315 Hz, <sup>2</sup>J<sub>F,C</sub> = 45 Hz, <sup>3</sup>J<sub>P,C</sub> = 12 Hz, CF<sub>2</sub>), 120.3 (qt, <sup>1</sup>J<sub>F,C</sub> = 284 Hz, <sup>2</sup>J<sub>F,C</sub> = 29 Hz, CF<sub>3</sub>), 33.2 (d, <sup>1</sup>J<sub>P,C</sub> = 24 Hz, C(CH<sub>3</sub>)<sub>3</sub>), 29.7 (d, <sup>2</sup>J<sub>P,C</sub> = 13 Hz, C(CH<sub>3</sub>)<sub>3</sub>), 9.0 (d, <sup>1</sup>J<sub>P,C</sub> = 44 Hz, CH<sub>2</sub>).

<sup>19</sup>F NMR (565 MHz, CD<sub>2</sub>Cl<sub>2</sub>): δ [ppm] = -82.7 (m, CF<sub>3</sub>), -110.5/-111.1 (m, AB-spin system, CF<sub>2</sub>, broad).

<sup>31</sup>P{<sup>1</sup>H} NMR (243 MHz, CD<sub>2</sub>Cl<sub>2</sub>): δ [ppm] = 15.9 (m).

Elemental analysis calcd (%) for C<sub>13</sub>H<sub>20</sub>F<sub>10</sub>PSb (*M*<sub>r</sub> = 519.02): C 30.08, H 3.88; found: C 30.12, H 3.87.

**(F<sub>5</sub>C<sub>2</sub>)<sub>2</sub>SbCH<sub>2</sub>P(tBu)<sub>2</sub>·CS<sub>2</sub> (**2**):**

A solution of **1** (0.25 g, 0.48 mmol) in *n*-pentane (5 mL) treated with CS<sub>2</sub> (0.3 mL, 5 mmol) was stirred at ambient temperature for 1 h. Crystallisation from the quiescent solution yielded (F<sub>5</sub>C<sub>2</sub>)<sub>2</sub>SbCH<sub>2</sub>P(tBu)<sub>2</sub>·CS<sub>2</sub> (**2**, 0.16 g, 0.31 mmol, 64 %). The deep red crystals were suitable for X-ray diffraction, but decompose slowly under reduced pressure.

For NMR data, a separate batch was prepared in a NMR tube with a solution of **1** (50 mg, 0.10 mmol) in toluene-*d*<sub>8</sub>, which was treated with CS<sub>2</sub> (0.05 mL, 0.8 mmol); due to the equilibrium, a small amount of **1** is still present.

*Analytical data:*

<sup>1</sup>H NMR (600 MHz, CD<sub>2</sub>Cl<sub>2</sub>): δ [ppm] = 2.42 (d, <sup>2</sup>J<sub>P,H</sub> = 9 Hz, 2H, CH<sub>2</sub>), 1.57 (d, <sup>3</sup>J<sub>P,H</sub> = 15 Hz, 18H, C(CH<sub>3</sub>)<sub>3</sub>).

<sup>13</sup>C{<sup>1</sup>H} NMR (151 MHz, CD<sub>2</sub>Cl<sub>2</sub>): δ [ppm] = 227.8 (d, <sup>1</sup>J<sub>P,C</sub> = 32 Hz, CS<sub>2</sub>), 125.5 (m, <sup>1</sup>J<sub>F,C</sub> = 317 Hz, <sup>2</sup>J<sub>F,C</sub> = 44 Hz, CF<sub>2</sub>), 121.1 (qt, <sup>1</sup>J<sub>F,C</sub> = 285 Hz, <sup>2</sup>J<sub>F,C</sub> = 29 Hz, CF<sub>3</sub>), 38.5 (d, <sup>1</sup>J<sub>P,C</sub> = 31 Hz, C(CH<sub>3</sub>)<sub>3</sub>), 28.8 (s, C(CH<sub>3</sub>)<sub>3</sub>), 3.5 (d, <sup>1</sup>J<sub>P,C</sub> = 43 Hz, CH<sub>2</sub>).

<sup>19</sup>F NMR (565 MHz, CD<sub>2</sub>Cl<sub>2</sub>): δ [ppm] = -81.8 (m, CF<sub>3</sub>), -111.8/-113.6 (m, AB-spin system CF<sub>2</sub>, broad).

<sup>31</sup>P{<sup>1</sup>H} NMR (243 MHz, CD<sub>2</sub>Cl<sub>2</sub>): δ [ppm] = 35.2 (s).

Elemental analysis calcd (%) for C<sub>14</sub>H<sub>20</sub>F<sub>10</sub>PS<sub>2</sub>Sb (*M*<sub>r</sub> = 595.15): C 28.25, H 3.39; found: C 28.85, H 3.37.

**(F<sub>5</sub>C<sub>2</sub>)<sub>2</sub>SbCH<sub>2</sub>P(tBu)<sub>2</sub>·SO<sub>2</sub> (**3**):**

SO<sub>2</sub> (1.1 mmol) was condensed onto **1** (110 mg, 212 μmol). On thawing, a colourless solid was immediately formed. After 15 min the excess of SO<sub>2</sub> was replaced with argon to give (F<sub>5</sub>C<sub>2</sub>)<sub>2</sub>SbCH<sub>2</sub>P(tBu)<sub>2</sub>·SO<sub>2</sub> (**3**, 124 mg, 212 μmol, quant.) as an amorphous colourless solid, which decomposes rapidly in an argon stream or under reduced pressure. Crystals, suitable for X-ray diffraction experiments, were obtained by cooling a solution of **3** in *n*-hexane to -20 °C.

For NMR data, a separate batch was prepared in a NMR tube with a solution of **1** (56 mg, 0.11 mmol) in CD<sub>2</sub>Cl<sub>2</sub>, which was treated with SO<sub>2</sub> (0.40 mmol).

Due to decomposition, it was not possible to prepare a sample for elemental analysis.

*Analytical data:*

<sup>1</sup>H NMR (600 MHz, CD<sub>2</sub>Cl<sub>2</sub>): δ [ppm] = 1.98 (d, <sup>2</sup>J<sub>P,H</sub> = 13 Hz, 2H, CH<sub>2</sub>), 1.46 (d, <sup>3</sup>J<sub>P,H</sub> = 14 Hz, 18H, C(CH<sub>3</sub>)<sub>3</sub>).

<sup>13</sup>C{<sup>1</sup>H} NMR (151 MHz, CD<sub>2</sub>Cl<sub>2</sub>): δ [ppm] = 126.6–121.5 (m, <sup>1</sup>J<sub>F,C</sub> = 317 Hz, <sup>2</sup>J<sub>F,C</sub> = 44 Hz, CF<sub>2</sub>), 123.9–117.8 (qt, <sup>1</sup>J<sub>F,C</sub> = 285 Hz, <sup>2</sup>J<sub>F,C</sub> = 29 Hz, CF<sub>3</sub>), 37.9 (d, <sup>1</sup>J<sub>P,C</sub> = 3 Hz, C(CH<sub>3</sub>)<sub>3</sub>), 28.5 (s, C(CH<sub>3</sub>)<sub>3</sub>), -2.2 (d, <sup>1</sup>J<sub>P,C</sub> = 10 Hz, CH<sub>2</sub>).

<sup>13</sup>C{<sup>19</sup>F} NMR (126 MHz, CD<sub>2</sub>Cl<sub>2</sub>): δ [ppm] = 124.0 (s, CF<sub>2</sub>), 120.9 (s, CF<sub>3</sub>).

<sup>19</sup>F NMR (565 MHz, CD<sub>2</sub>Cl<sub>2</sub>): δ [ppm] = -82.1 (m, CF<sub>3</sub>), -114.0/-114.5 (m, AB-spin system CF<sub>2</sub>, broad).

<sup>31</sup>P{<sup>1</sup>H} NMR (243 MHz, CD<sub>2</sub>Cl<sub>2</sub>): δ [ppm] = 43.7 (s).

**(F<sub>5</sub>C<sub>2</sub>)<sub>2</sub>SbCH<sub>2</sub>P(tBu)<sub>2</sub>·PhNCO (4):**

A solution of **1** (155 mg, 300 μmol) in dichloromethane (2 mL) was treated with a solution of phenyl isocyanate (40 mg, 0.34 mmol) in dichloromethane (1 mL). After stirring for 1 h at ambient temperature, the solution was concentrated under reduced pressure. By addition of *n*-hexane (2 mL), a colourless solid precipitated, which was washed with *n*-hexane (3 × 1 mL) and dried under vacuum. (F<sub>5</sub>C<sub>2</sub>)<sub>2</sub>SbCH<sub>2</sub>P(tBu)<sub>2</sub>·PhNCO (**4**, 178 mg) was obtained as colourless solid. NMR spectra and elemental analysis indicate a small proportion of remaining phenyl isocyanate.

Single crystals suitable for X-ray diffraction were received by cooling a saturated solution of **4** in CD<sub>2</sub>Cl<sub>2</sub> down to -20 °C.

In addition to the product signal set, the dissolved NMR sample contains a small amount of the two reactants. IR analysis was used to compare the isolated product as a solid and as a solution in CCl<sub>4</sub> with a solution of phenyl isocyanate in CCl<sub>4</sub>. A band characteristic of phenyl isocyanate was detected for both solutions; this was not detected in the solid sample (see below).

Due to the low natural abundance of the <sup>15</sup>N nucleus, <sup>15</sup>N <sup>1</sup>H HMBC spectra of highly concentrated samples were recorded to detect the chemical shift. A small excess of phenyl isocyanate is present in the separately recorded spectra to facilitate comparison between product and reactant.

*Analytical data:*

**<sup>1</sup>H NMR** (600 MHz, CD<sub>2</sub>Cl<sub>2</sub>): δ [ppm] = 7.31 (m, 2H, Ph), 7.12 (m, 3H, Ph), 2.15 (d, <sup>2</sup>J<sub>P,H</sub> = 10 Hz, 2H, CH<sub>2</sub>), 1.58 (d, <sup>3</sup>J<sub>P,H</sub> = 15 Hz, 18H, C(CH<sub>3</sub>)<sub>3</sub>).

**<sup>13</sup>C{<sup>1</sup>H} NMR** (151 MHz, CD<sub>2</sub>Cl<sub>2</sub>): δ [ppm] = 160.1 (d, <sup>1</sup>J<sub>P,C</sub> = 97 Hz, PC(=O)N), 144.6 (m, C<sub>ipso</sub>), 129.0 (s, Ph), 126.3 (m, CF<sub>2</sub>, broad and overlapping with another signal), 125.5 (s, Ph), 124.8 (s, Ph), 121.3 (qt, <sup>1</sup>J<sub>F,C</sub> = 285 Hz, <sup>2</sup>J<sub>F,C</sub> = 29 Hz, CF<sub>3</sub>), 35.8 (d, <sup>1</sup>J<sub>P,C</sub> = 32 Hz, C(CH<sub>3</sub>)<sub>3</sub>), 27.9 (s, C(CH<sub>3</sub>)<sub>3</sub>), -1.6 (d, <sup>1</sup>J<sub>P,C</sub> = 32 Hz, CH<sub>2</sub>).

**<sup>15</sup>N NMR** (61 MHz, CD<sub>2</sub>Cl<sub>2</sub>): δ [ppm] = 150.3 (from <sup>15</sup>N <sup>1</sup>H HMBC).

**<sup>19</sup>F NMR** (565 MHz, CD<sub>2</sub>Cl<sub>2</sub>): δ [ppm] = -82.3 (s, CF<sub>3</sub>), -112.9/-115.4 (d, <sup>2</sup>J<sub>F,F</sub> = 303 Hz/300 Hz, AB-spin system CF<sub>2</sub>, broad).

**<sup>31</sup>P{<sup>1</sup>H} NMR** (243 MHz, CD<sub>2</sub>Cl<sub>2</sub>): δ [ppm] = 27.4 (s).

Elemental analysis calcd (%) for C<sub>20</sub>H<sub>25</sub>F<sub>10</sub>NOPSb (*M<sub>r</sub>* = 638.14): C 37.64, H 3.95, N 2.19; found: C 39.39, H 4.02, N 2.62.

**(F<sub>5</sub>C<sub>2</sub>)<sub>2</sub>SbCH<sub>2</sub>P(tBu)<sub>2</sub>·PhNCS (5):**

A solution of **1** (158 mg, 304 μmol) in dichloromethane (2 mL) was treated with a solution of phenyl isothiocyanate (48 mg, 0.36 mmol) in dichloromethane (1 mL). After stirring at ambient temperature for 1 h, the yellow solution was concentrated under reduced pressure. By adding *n*-hexane (2 mL), a yellowish solid precipitated, which was washed with *n*-hexane (3 × 1 mL) and dried in vacuum. (F<sub>5</sub>C<sub>2</sub>)<sub>2</sub>SbCH<sub>2</sub>P(tBu)<sub>2</sub>·PhNCS (**5**, 191 mg, 292 μmol, 96 %) was received as yellowish solid. Single crystals suitable for X-ray diffraction were received from a saturated solution of **5** in *n*-hexane.

The NMR spectra show two sets of signals (**A** and **B** in the following) that are similar in structure, but have a slight deviation in the chemical shift and the intensity of the respective resonances. When compared with the adducts listed above, both sets of signals give reasonable variants for phenyl isothiocyanate adducts.

Attempts to separate the two species either failed or resulted in unspecific degradation.

The experiment was repeated several times with an analogous procedure, including execution at  $-78\text{ }^{\circ}\text{C}$  and  $80\text{ }^{\circ}\text{C}$ , with the two species detected in a similar ratio by NMR analysis. Additional VT-NMR studies ( $-40$ – $80\text{ }^{\circ}\text{C}$ ) in toluene- $d_8$  do not indicate a temperature dependent equilibrium of **A** and **B**. At  $80\text{ }^{\circ}\text{C}$  both **A** and **B** decomposed to their reactants.

Due to the low natural abundance of the  $^{15}\text{N}$  nucleus,  $^{15}\text{N}$   $^1\text{H}$  HMBC spectra of highly concentrated samples were recorded to determine the chemical shift. A small excess of phenyl isothiocyanate is present in the separately recorded spectra to facilitate comparison between product and reactant.

*Analytical data:*

$^1\text{H}$  NMR (600 MHz,  $\text{CD}_2\text{Cl}_2$ ):  $\delta$  [ppm] = 7.41 – 6.91 (Ph, broad and overlap of different signals), 2.28 (d,  $^2J_{\text{P,H}} = 9\text{ Hz}$ , 2H, **A**  $\text{CH}_2$ ), 2.16 (d,  $^2J_{\text{P,H}} = 9\text{ Hz}$ , **B**  $\text{CH}_2$ ), 1.70 (d,  $^3J_{\text{P,H}} = 15\text{ Hz}$ , **B**  $\text{C}(\text{CH}_3)_3$ ), 1.59 (d,  $^3J_{\text{P,H}} = 15\text{ Hz}$ , 18H, **A**  $\text{C}(\text{CH}_3)_3$ ).

$^{13}\text{C}\{^1\text{H}\}$  NMR (151 MHz,  $\text{CD}_2\text{Cl}_2$ ):  $\delta$  [ppm] = 178.2 (d,  $^1J_{\text{P,C}} = 77\text{ Hz}$ , **B** SCN), 168.7 (d,  $^1J_{\text{P,C}} = 91\text{ Hz}$ , **A** SCN), 151.0 (d,  $^3J_{\text{P,C}} = 28\text{ Hz}$ , **A**  $\text{C}_{\text{ipso}}$ ), 147.3 (d,  $^3J_{\text{P,C}} = 22\text{ Hz}$ , **B**  $\text{C}_{\text{ipso}}$ ), 130.2 (s), 129.3 (s), 128.6 (s), 126.3 (s), 125.4 (s), 124.0 (s), 121.8 (s), 121.4 (qt,  $^1J_{\text{F,C}} = 285\text{ Hz}$ ,  $^2J_{\text{F,C}} = 29\text{ Hz}$ , **A**  $\text{CF}_3$ ), 37.7 (d,  $^1J_{\text{P,C}} = 31\text{ Hz}$ , **A** and **B**  $\text{C}(\text{CH}_3)_3$ ,  $^{13}\text{C}$   $^1\text{H}$  HMBC shows overlap of signals), 28.5 (s, **A** and **B**  $\text{C}(\text{CH}_3)_3$ ,  $^{13}\text{C}$   $^1\text{H}$  HMQC shows overlap of signals),  $-0.3$  (d,  $^1J_{\text{P,C}} = 51\text{ Hz}$ , **A**  $\text{CH}_2$ ),  $-2.3$  (d,  $^1J_{\text{P,C}} = 34\text{ Hz}$ , **B**  $\text{CH}_2$ ). (**A** and **B**  $\text{CF}_2$  and **B**  $\text{CF}_3$  are not observable, due to low intensity and overlapping with other signals).

$^{15}\text{N}$  NMR (61 MHz,  $\text{CD}_2\text{Cl}_2$ ):  $\delta$  [ppm] = 345.2 (**A**, from  $^{15}\text{N}$   $^1\text{H}$  HMBC).

$^{19}\text{F}$  NMR (565 MHz,  $\text{CD}_2\text{Cl}_2$ ):  $\delta$  [ppm] =  $-81.6$  (m, **A**  $\text{CF}_3$ ),  $-82.4$  (m, **B**  $\text{CF}_3$ ),  $-112.5$  –  $-115.6$  (m, AB-spin systems **A** and **B**  $\text{CF}_2$ , broad and overlapping).

$^{31}\text{P}\{^1\text{H}\}$  NMR (243 MHz,  $\text{CD}_2\text{Cl}_2$ ):  $\delta$  [ppm] = 33.3 (s, **A**), 30.1 (s, **B**).

Elemental analysis calcd (%) for  $\text{C}_{20}\text{H}_{25}\text{F}_{10}\text{NPSSb}$  ( $M_r = 654.20$ ): C 36.72, H 3.85, N 2.14, S 4.90; found: C 36.80, H 3.84, N 2.07, S 4.91.

**$[(\text{F}_5\text{C}_2)_2\text{SbCH}_2\text{P}(\text{tBu})_2]_2\cdot\text{AuCl}$  (**6**):**

A solution of **1** (137 mg, 264  $\mu\text{mol}$ ) in toluene (5 mL) was treated with  $(\text{MePPH}_2)\text{AuCl}$  (55 mg, 0.13 mmol). After stirring at ambient temperature for 1 h, all volatile compounds were removed in vacuum and the obtained residue was washed with toluene ( $2 \times 2\text{ mL}$ ) to yield  $[(\text{F}_5\text{C}_2)_2\text{SbCH}_2\text{P}(\text{tBu})_2]_2\cdot\text{AuCl}$  (**6**, 165 mg, 130  $\mu\text{mol}$ , quant.) as colourless solid. Single crystals suitable for X-ray diffraction were received from a saturated solution of **6** in  $\text{CD}_2\text{Cl}_2$ .

*Analytical data:*

$^1\text{H}$  NMR (600 MHz,  $\text{CD}_2\text{Cl}_2$ ):  $\delta$  [ppm] = 2.52 (m, 4H,  $\text{CH}_2$ ), 1.41 (m, 36H,  $\text{C}(\text{CH}_3)_3$ ).

$^{13}\text{C}\{^1\text{H}\}$  NMR (151 MHz,  $\text{CD}_2\text{Cl}_2$ ):  $\delta$  [ppm] = 127.2–122.1 (m,  $^1J_{\text{F,C}} = 317\text{ Hz}$ ,  $^2J_{\text{F,C}} = 44\text{ Hz}$ ,  $\text{CF}_2$ ), 122.0–117.8 (qt,  $^1J_{\text{F,C}} = 285\text{ Hz}$ ,  $^2J_{\text{F,C}} = 29\text{ Hz}$ ,  $\text{CF}_3$ ), 37.3 (m,  $\text{C}(\text{CH}_3)_3$ ), 29.9 (m,  $\text{C}(\text{CH}_3)_3$ ), 7.5 (m,  $\text{CH}_2$ ).

$^{13}\text{C}\{^{19}\text{F}\}$  NMR (126 MHz,  $\text{CD}_2\text{Cl}_2$ ):  $\delta$  [ppm] = 124.7 (m,  $\text{CF}_2$ ), 120.9 (s,  $\text{CF}_3$ ).

$^{19}\text{F}$  NMR (565 MHz,  $\text{CD}_2\text{Cl}_2$ ):  $\delta$  [ppm] =  $-81.7$  (m,  $\text{CF}_3$ ),  $-109.5$ – $-111.5$  (m, AB-spin system  $\text{CF}_2$ , broad).

$^{31}\text{P}\{^1\text{H}\}$  NMR (243 MHz,  $\text{CD}_2\text{Cl}_2$ ):  $\delta$  [ppm] = 74.0 (s).

Elemental analysis calcd (%) for  $\text{C}_{26}\text{H}_{40}\text{AuClF}_{20}\text{P}_2\text{Sb}_2$  ( $M_r = 1270.46$ ): C 24.58, H 3.17; found: C 24.61, H 3.25.

**[(F<sub>5</sub>C<sub>2</sub>)<sub>2</sub>SbCH<sub>2</sub>P(tBu)<sub>2</sub>]<sub>2</sub>·AuOTf (**7**):**

A suspension of AgOTf (7.0 mg, 27 μmol) in *n*-hexane (1 mL) was treated with a solution of **6** (18 mg, 14 μmol) in *n*-hexane (1 mL). A colourless solid precipitated rapidly. This suspension was stirred overnight at ambient temperature, the solid was filtered and washed with *n*-hexane (3 × 1 mL). The volatile compounds were removed in vacuum, **7** was solved in CD<sub>2</sub>Cl<sub>2</sub> and the solution was separated from the residue. After drying under vacuum, [(F<sub>5</sub>C<sub>2</sub>)<sub>2</sub>SbCH<sub>2</sub>P(tBu)<sub>2</sub>]<sub>2</sub>·AuOTf (**7**, 17 mg) was obtained as a colourless solid. Single crystals suitable for X-ray diffraction were obtained from a saturated solution of **7** in C<sub>6</sub>D<sub>6</sub>.

*Analytical data:*

<sup>1</sup>H NMR (600 MHz, CD<sub>2</sub>Cl<sub>2</sub>): δ [ppm] = 2.53 (m, 4H, CH<sub>2</sub>), 1.46 (m, 36H, C(CH<sub>3</sub>)<sub>3</sub>).

<sup>13</sup>C{<sup>1</sup>H} NMR (151 MHz, CD<sub>2</sub>Cl<sub>2</sub>): δ [ppm] = 39.0 (m, C(CH<sub>3</sub>)<sub>3</sub>), 29.8 (m, C(CH<sub>3</sub>)<sub>3</sub>), 6.1 (m, CH<sub>2</sub>).

<sup>13</sup>C{<sup>19</sup>F} NMR (151 MHz, CD<sub>2</sub>Cl<sub>2</sub>): δ [ppm] = 121.1 (s, O<sub>3</sub>SCF<sub>3</sub>), 119.8 (s, CF<sub>3</sub>).

<sup>19</sup>F NMR (565 MHz, CD<sub>2</sub>Cl<sub>2</sub>): δ [ppm] = -78.3 (s, O<sub>3</sub>SCF<sub>3</sub>), -81.9 (m, CF<sub>2</sub>CF<sub>3</sub>), -106.5/-108.8 (m, AB-spin system CF<sub>2</sub>, broad).

<sup>31</sup>P{<sup>1</sup>H} NMR (243 MHz, CD<sub>2</sub>Cl<sub>2</sub>): δ [ppm] = 78.2 (s).

Elemental analysis calcd (%) for C<sub>27</sub>H<sub>40</sub>AuF<sub>23</sub>O<sub>3</sub>P<sub>2</sub>SSb<sub>2</sub> (M<sub>r</sub> = 1384.07): C 23.42, H 2.91, S 2.32; found: C 24.22, H 3.03, S 1.24.

## NMR spectroscopy data

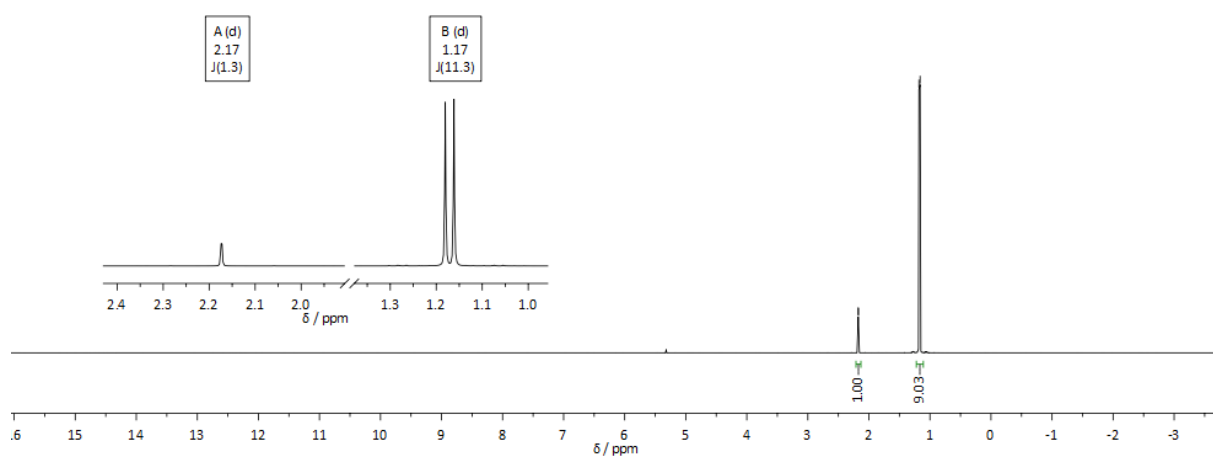

**Figure S1**  $^1\text{H}$  NMR spectrum of **1** in  $\text{CD}_2\text{Cl}_2$ .

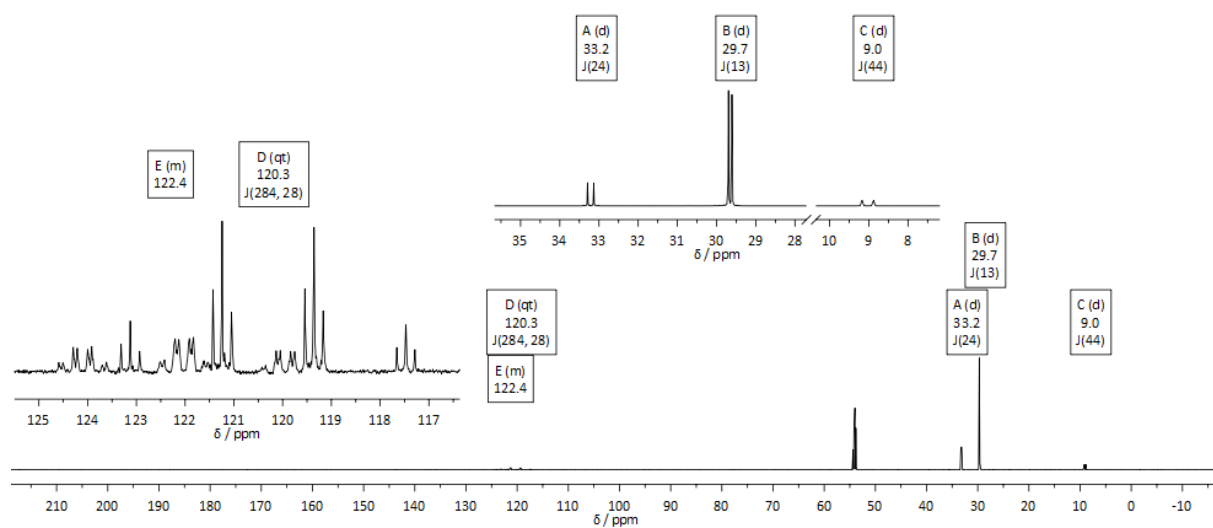

**Figure S2**  $^{13}\text{C}\{^1\text{H}\}$  NMR spectrum of **1** in  $\text{CD}_2\text{Cl}_2$ .

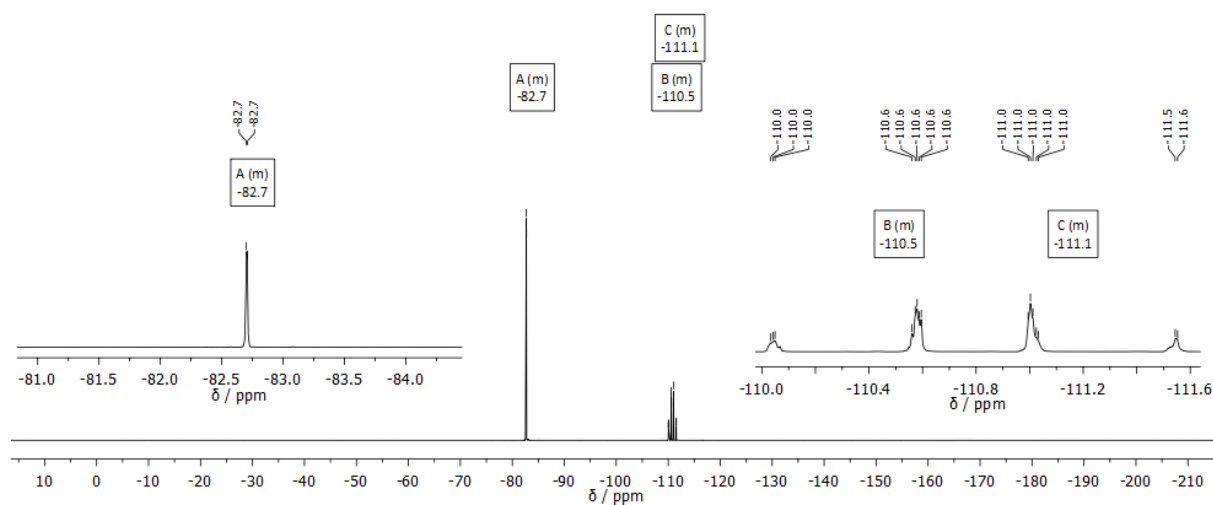

**Figure S3**  $^{19}\text{F}$  NMR spectrum of **1** in  $\text{CD}_2\text{Cl}_2$ .



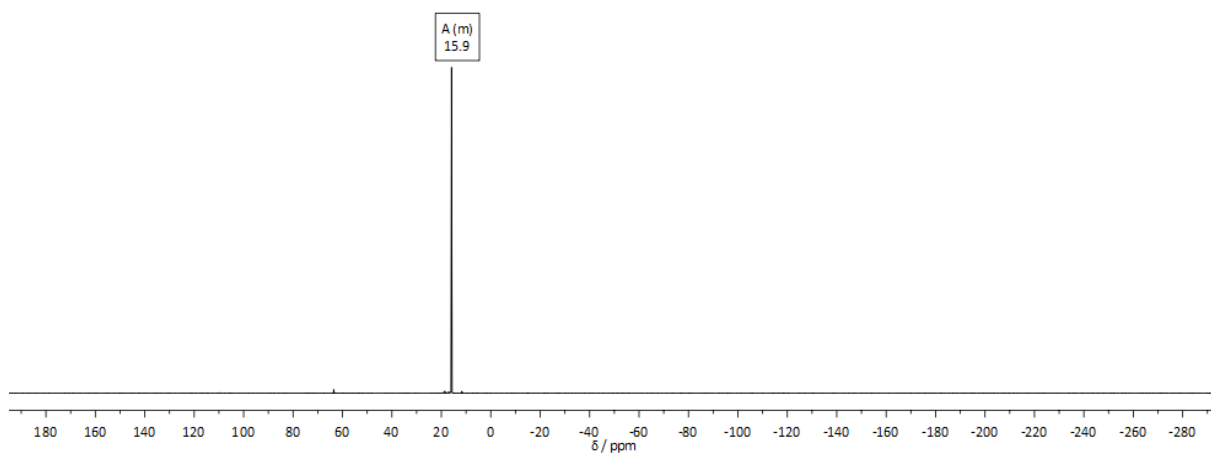

Figure S4  $^{31}\text{P}\{^1\text{H}\}$  NMR spectrum of **1** in  $\text{CD}_2\text{Cl}_2$ .

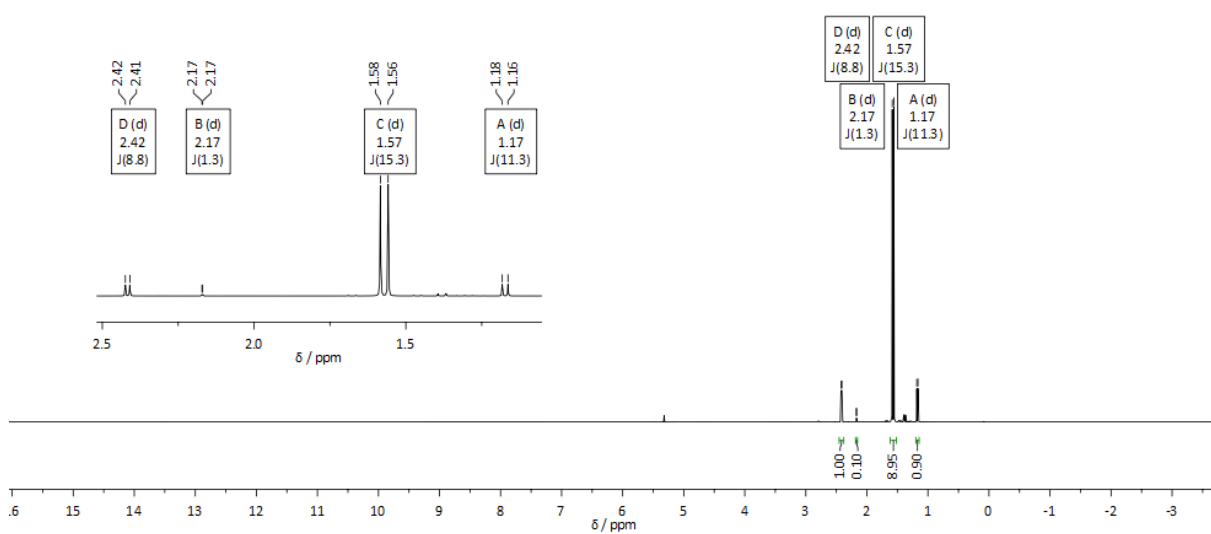

Figure S5  $^1\text{H}$  NMR spectrum of **2** in  $\text{CD}_2\text{Cl}_2$ .

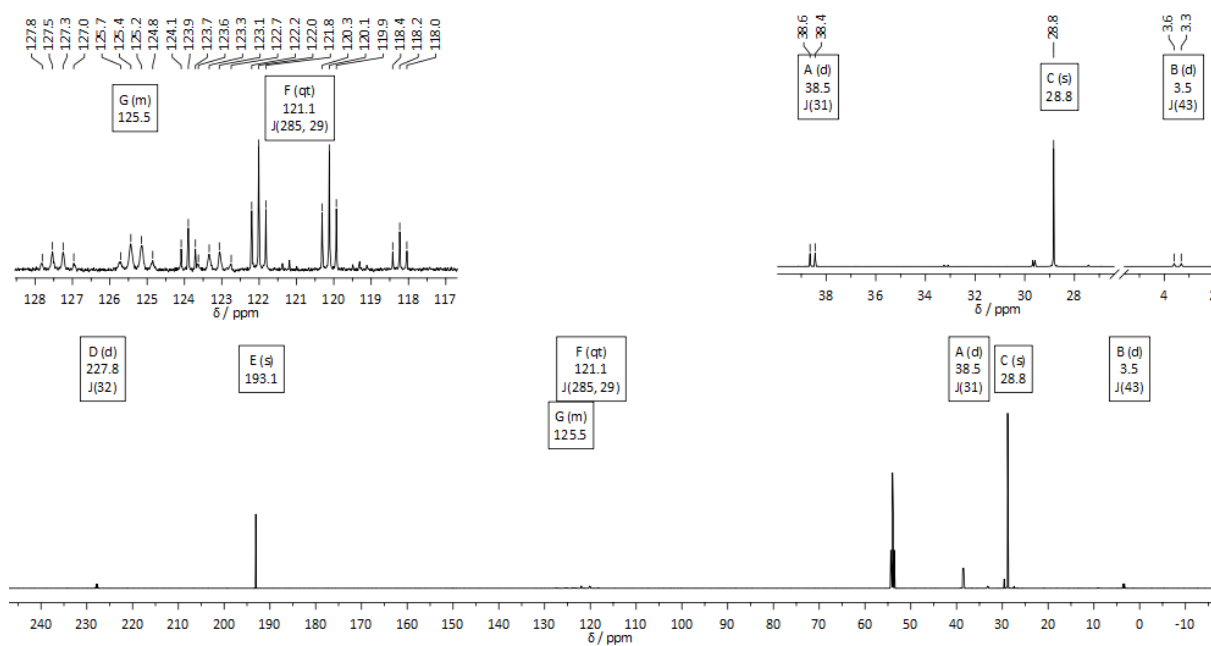

Figure S6  $^{13}\text{C}\{^1\text{H}\}$  NMR spectrum of **2** in  $\text{CD}_2\text{Cl}_2$ .

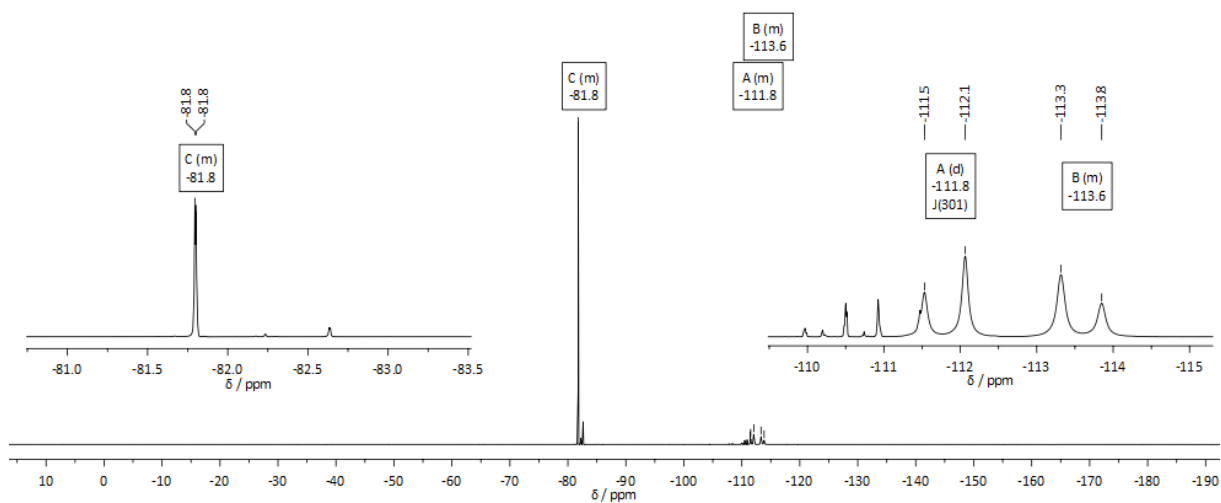

Figure S7  $^{19}\text{F}$  NMR spectrum of **2** in  $\text{CD}_2\text{Cl}_2$ .

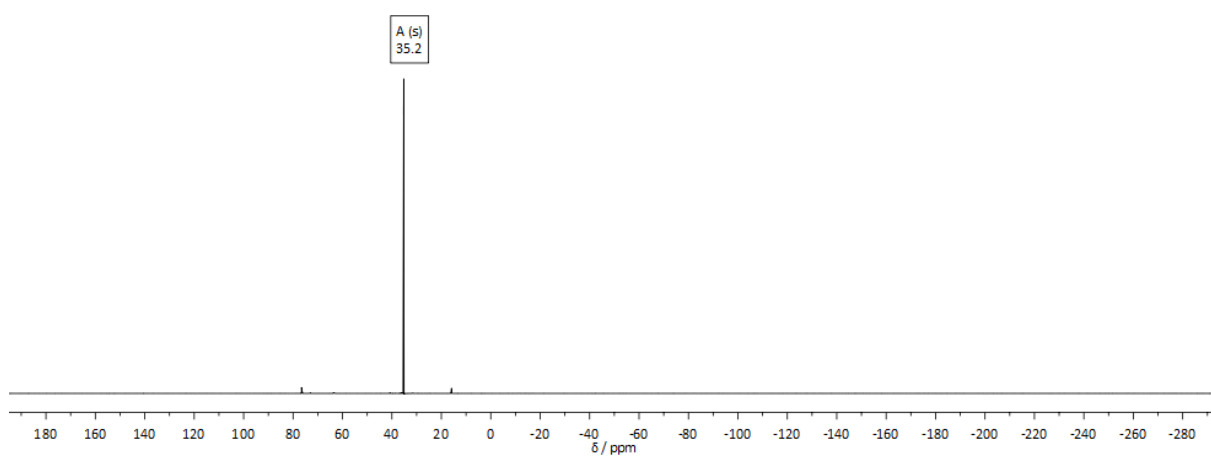

Figure S8  $^{31}\text{P}\{^1\text{H}\}$  NMR spectrum of **2** in  $\text{CD}_2\text{Cl}_2$ .

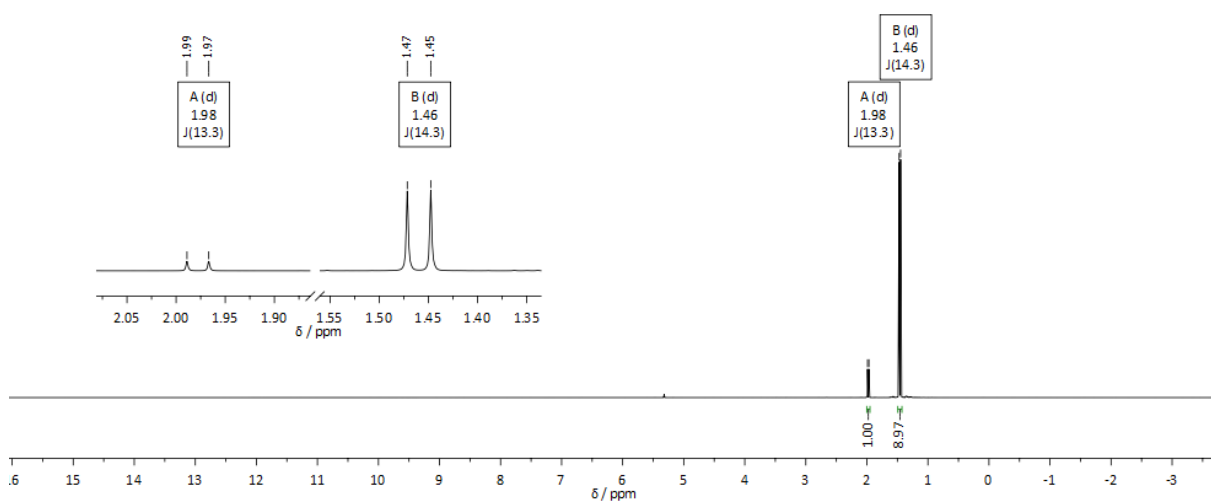

Figure S9  $^1\text{H}$  NMR spectrum of **3** in  $\text{CD}_2\text{Cl}_2$ .

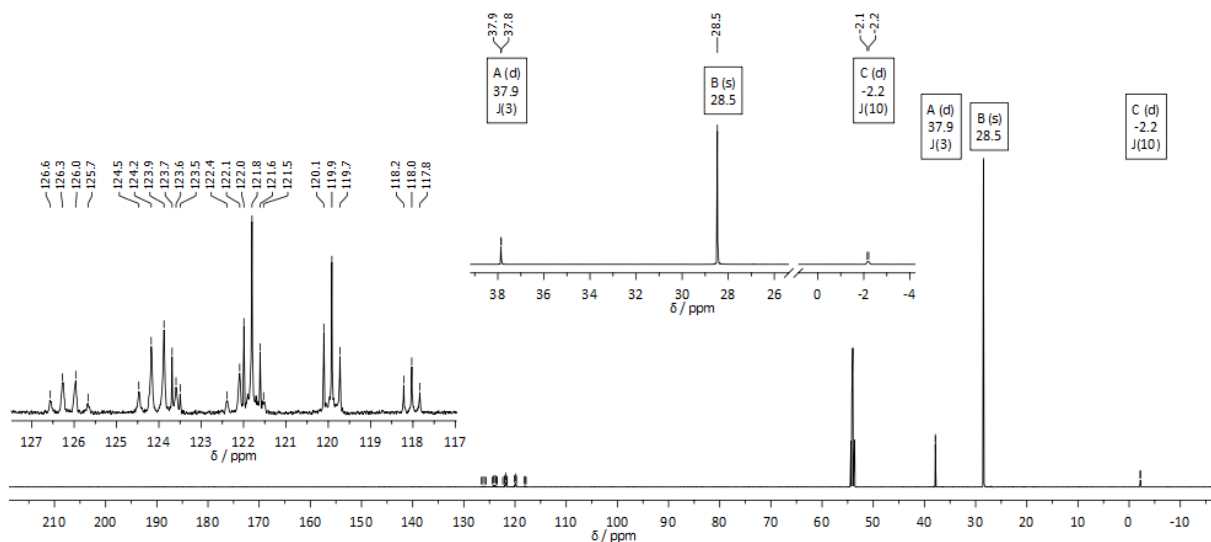

Figure S10  $^{13}\text{C}\{^1\text{H}\}$  NMR spectrum of **3** in  $\text{CD}_2\text{Cl}_2$ .

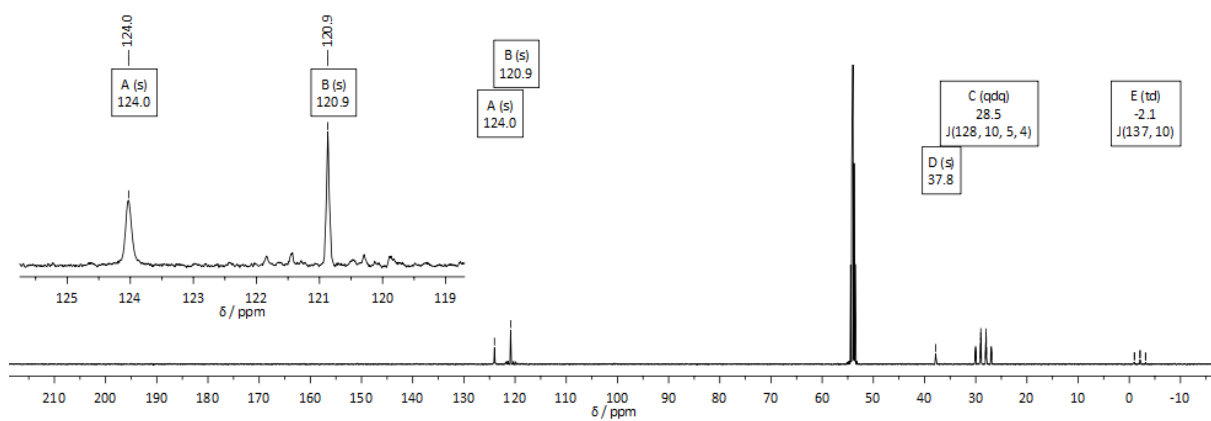

Figure S11  $^{13}\text{C}\{^{19}\text{F}\}$  NMR spectrum of **3** in  $\text{CD}_2\text{Cl}_2$ .

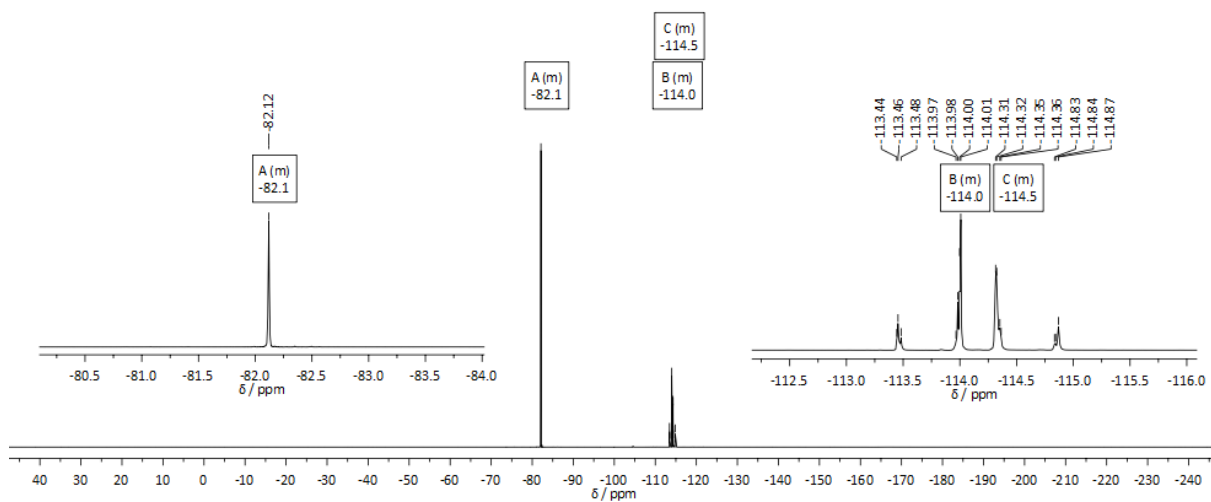

Figure S12  $^{19}\text{F}$  NMR spectrum of **3** in  $\text{CD}_2\text{Cl}_2$ .

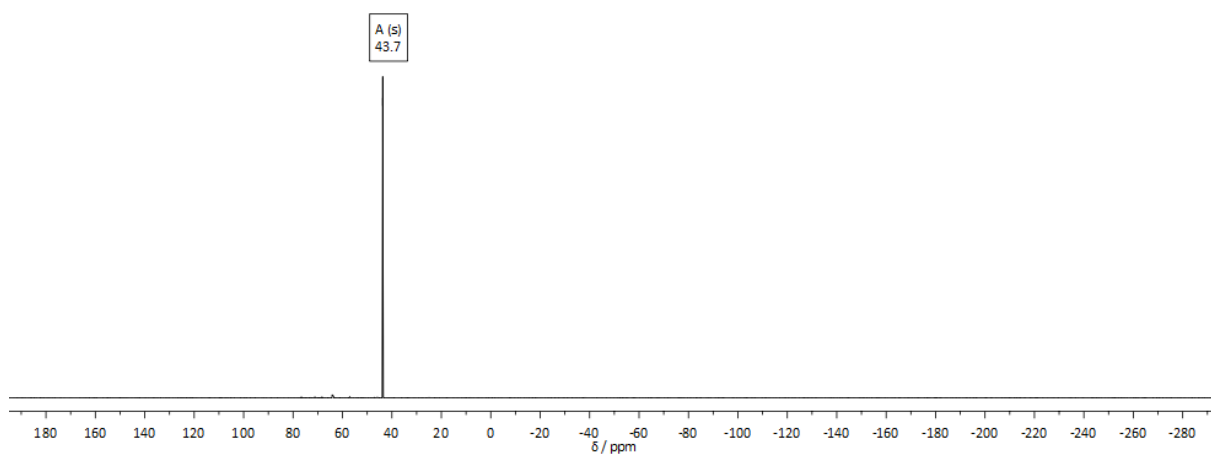

**Figure S13** <sup>31</sup>P{<sup>1</sup>H} NMR spectrum of **3** in CD<sub>2</sub>Cl<sub>2</sub>.

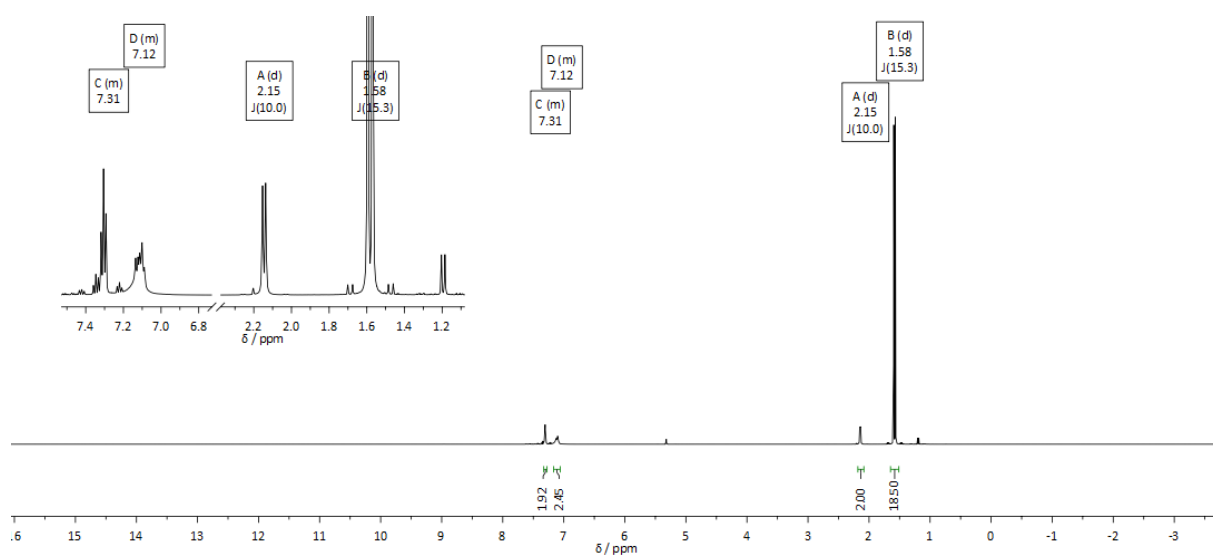

**Figure S14** <sup>1</sup>H NMR spectrum of **4** in CD<sub>2</sub>Cl<sub>2</sub>.

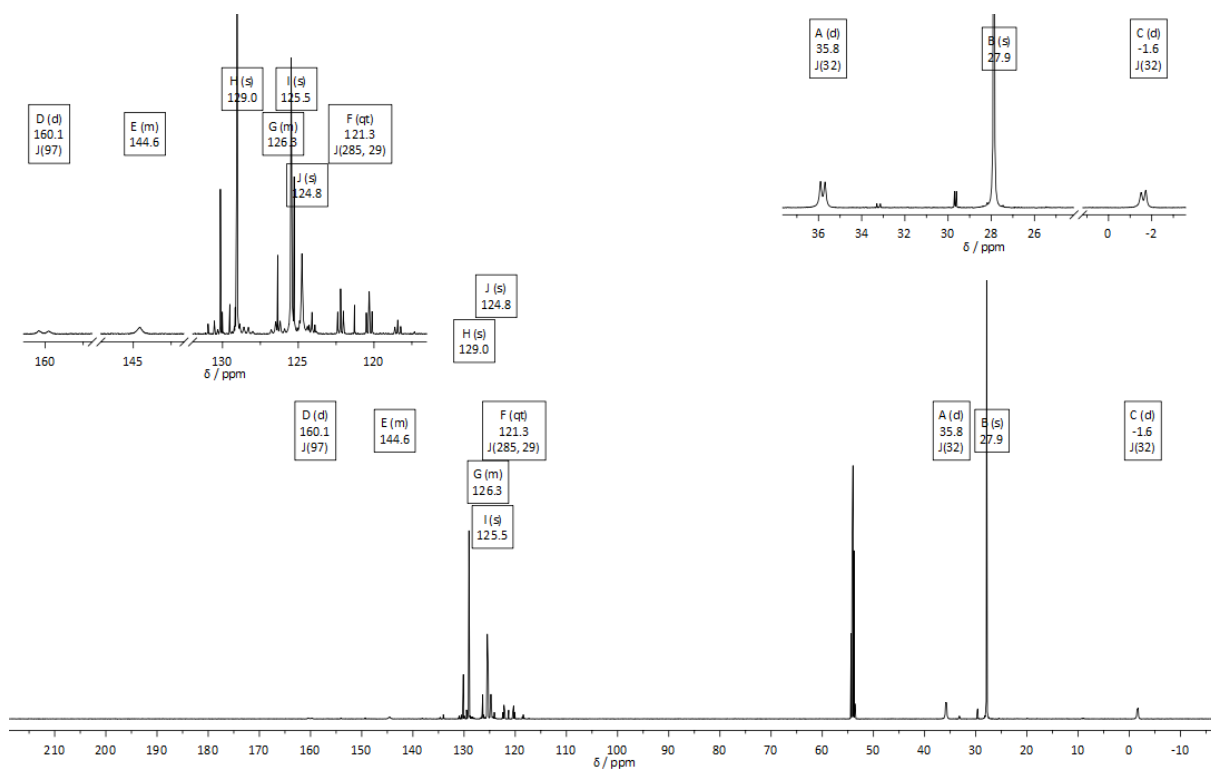

**Figure S15**  $^{13}\text{C}\{^1\text{H}\}$  NMR spectrum of **4** in  $\text{CD}_2\text{Cl}_2$ .

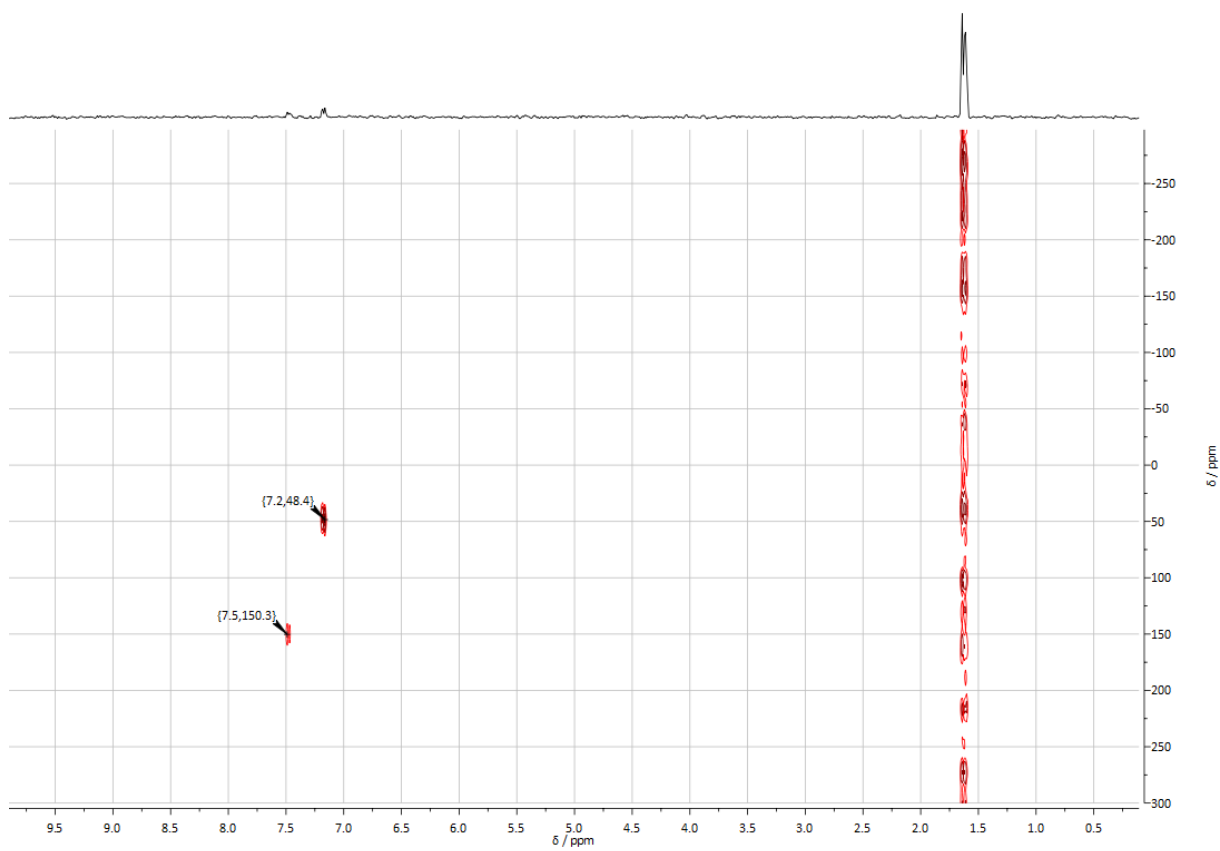

**Figure S16**  $^{15}\text{N}\ ^1\text{H}$  HMBC NMR spectrum of **4** in  $\text{CD}_2\text{Cl}_2$ .

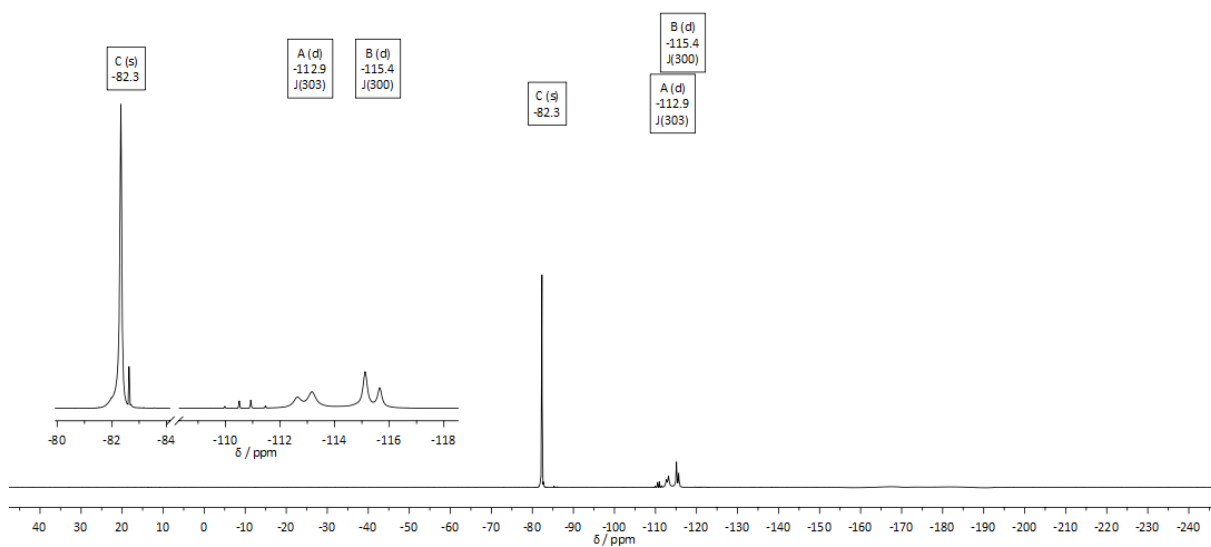

**Figure S17**  $^{19}\text{F}$  NMR spectrum of **4** in  $\text{CD}_2\text{Cl}_2$ .

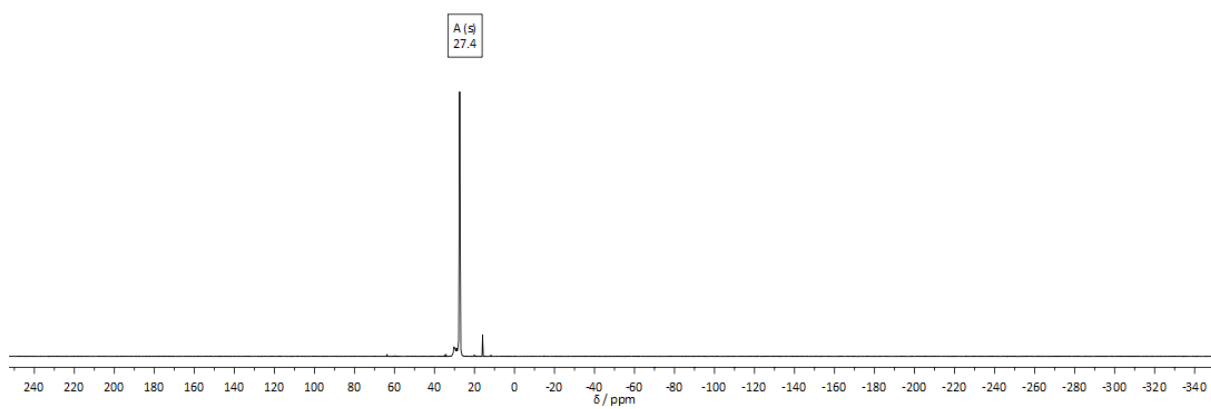

**Figure S18**  $^{31}\text{P}\{^1\text{H}\}$  NMR spectrum of **4** in  $\text{CD}_2\text{Cl}_2$ .

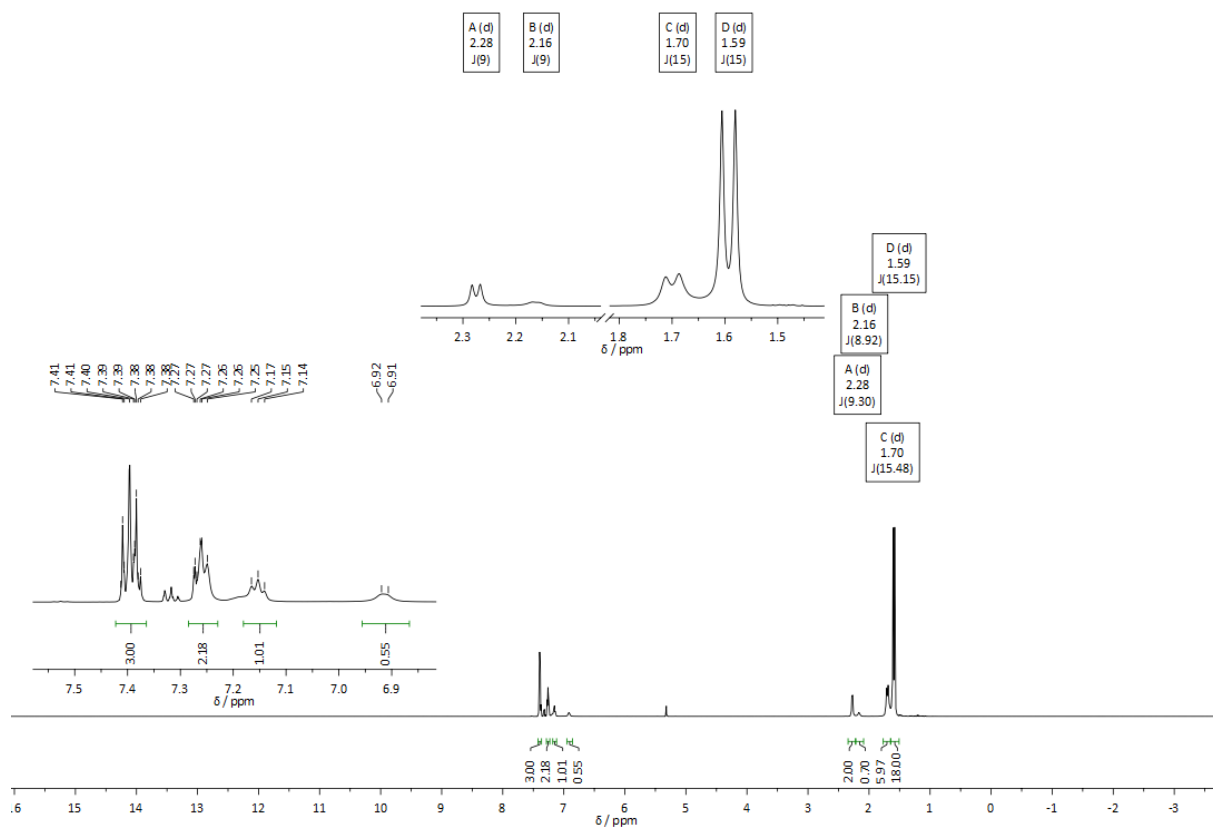

**Figure S19** <sup>1</sup>H NMR spectrum of **5** in CD<sub>2</sub>Cl<sub>2</sub>.

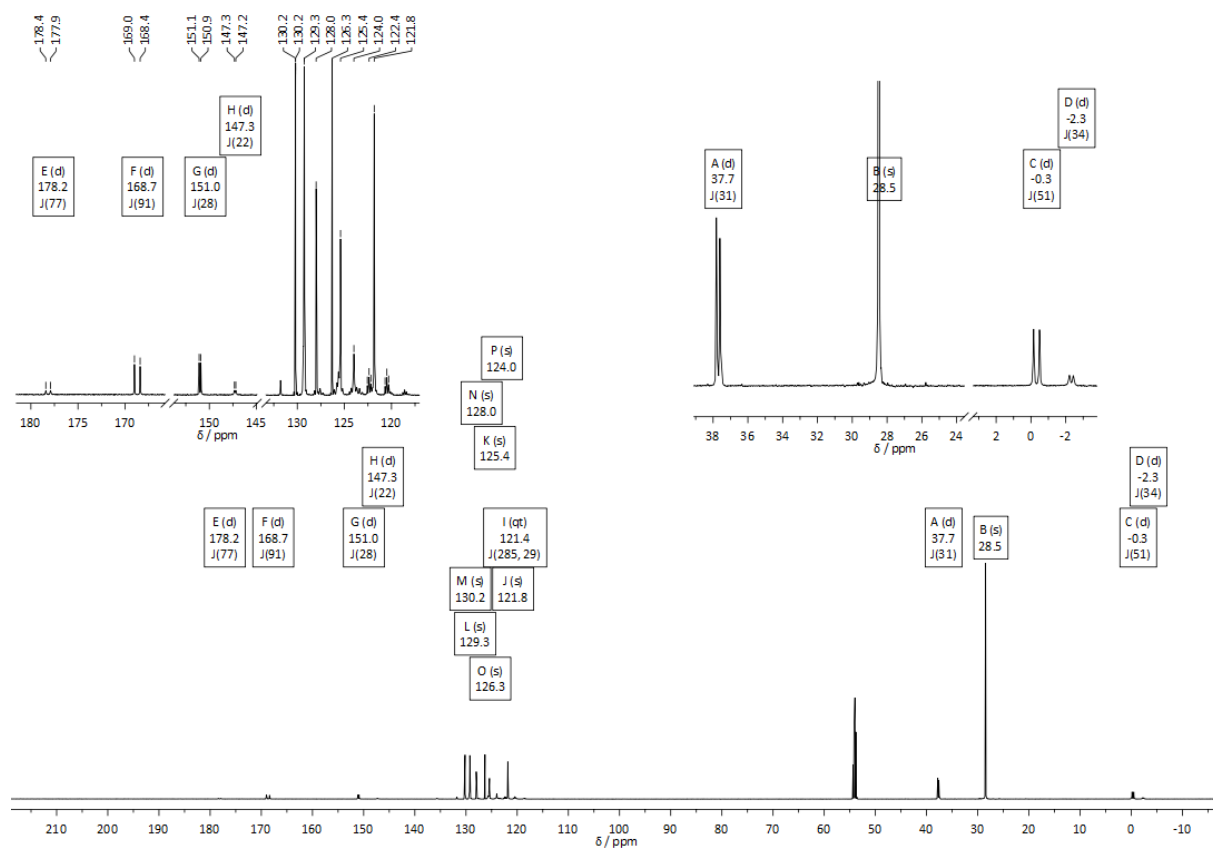

**Figure S20** <sup>13</sup>C{<sup>1</sup>H} NMR spectrum of **5** in CD<sub>2</sub>Cl<sub>2</sub>.

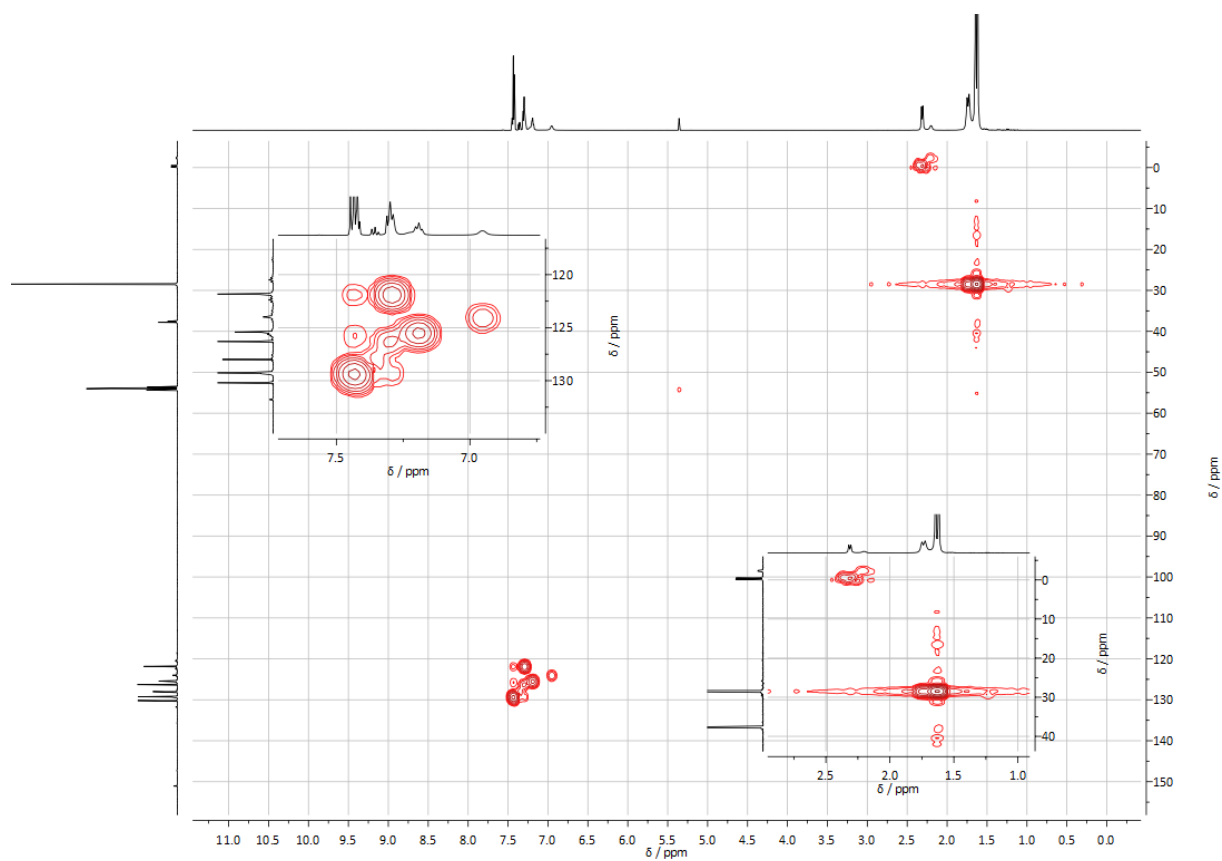

Figure S21  $^{13}\text{C}$   $^1\text{H}$  HMQC NMR spectrum of **5** in  $\text{CD}_2\text{Cl}_2$ .

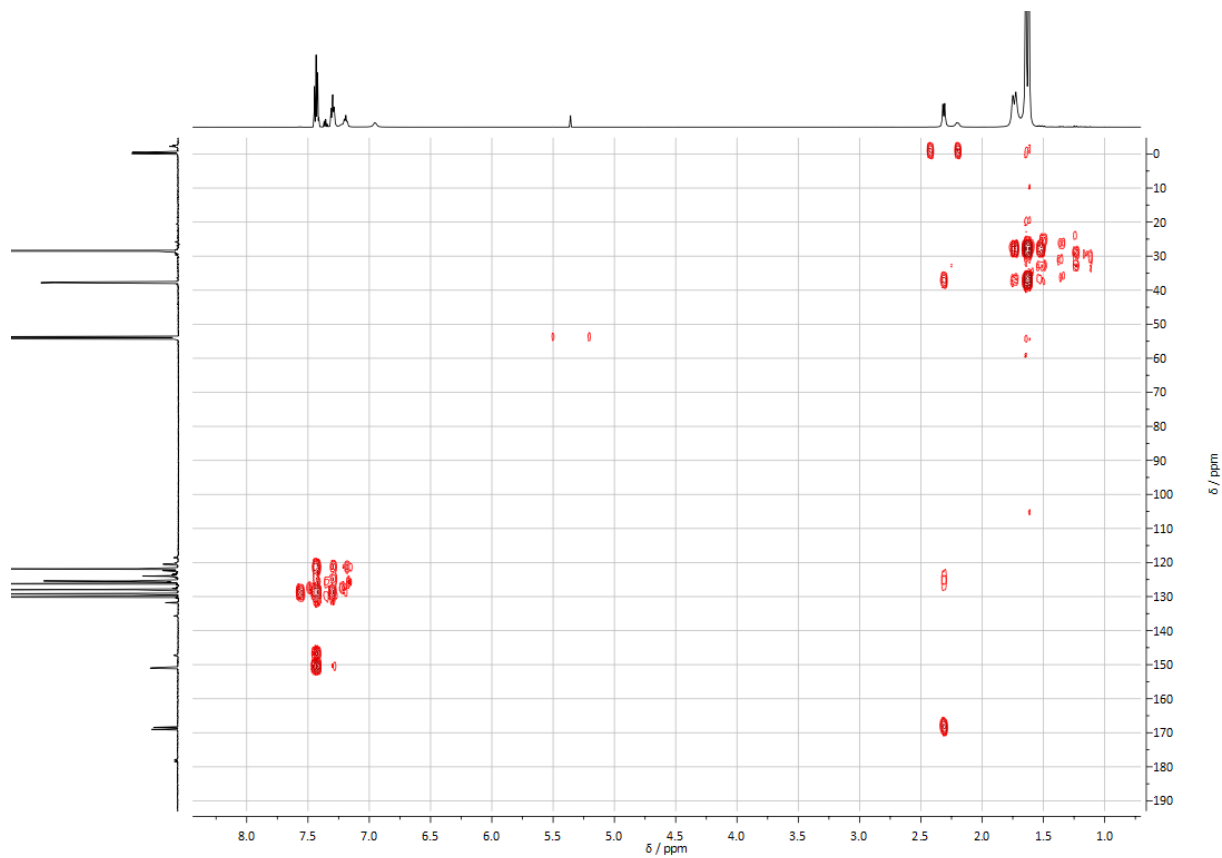

Figure S22  $^{13}\text{C}$   $^1\text{H}$  HMQC NMR spectrum of **5** in  $\text{CD}_2\text{Cl}_2$ .



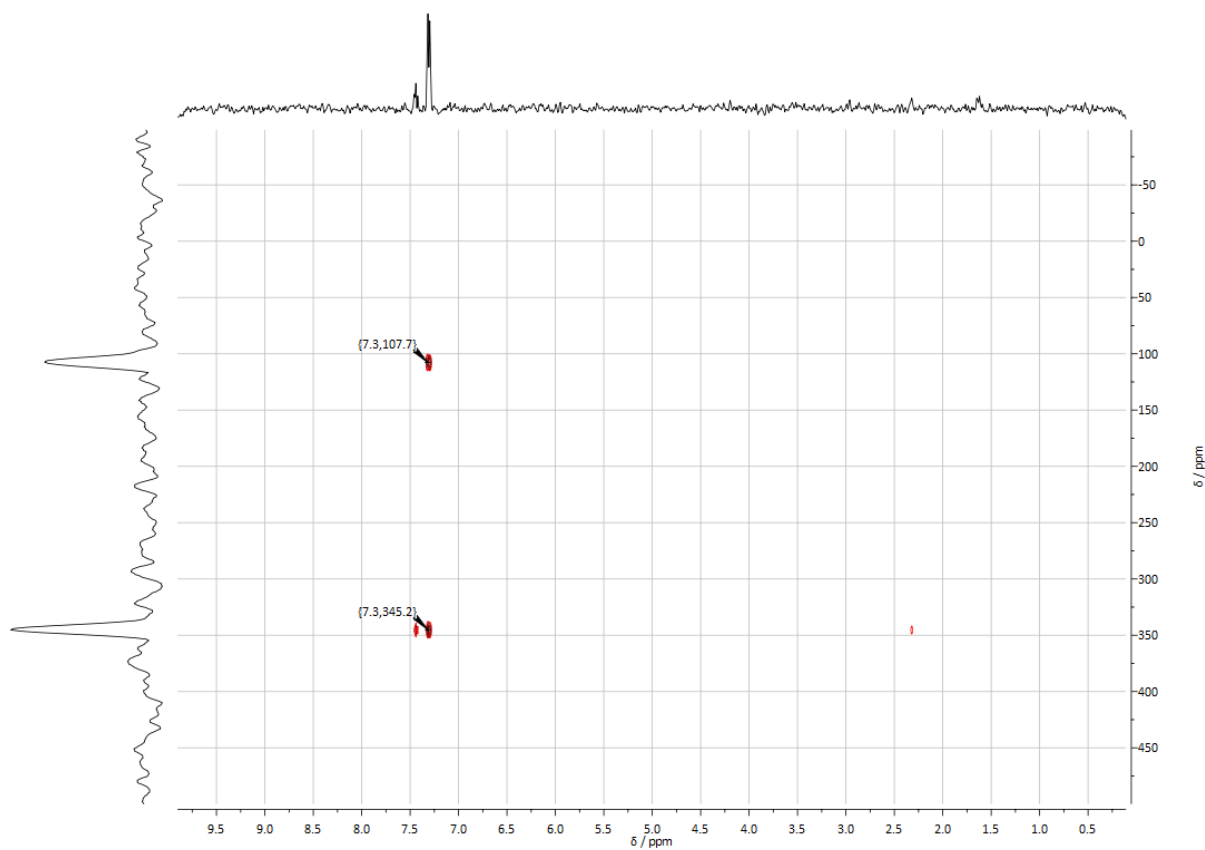

Figure S23  $^{15}\text{N}$   $^1\text{H}$  HMBC NMR spectrum of **5** in  $\text{CD}_2\text{Cl}_2$ .

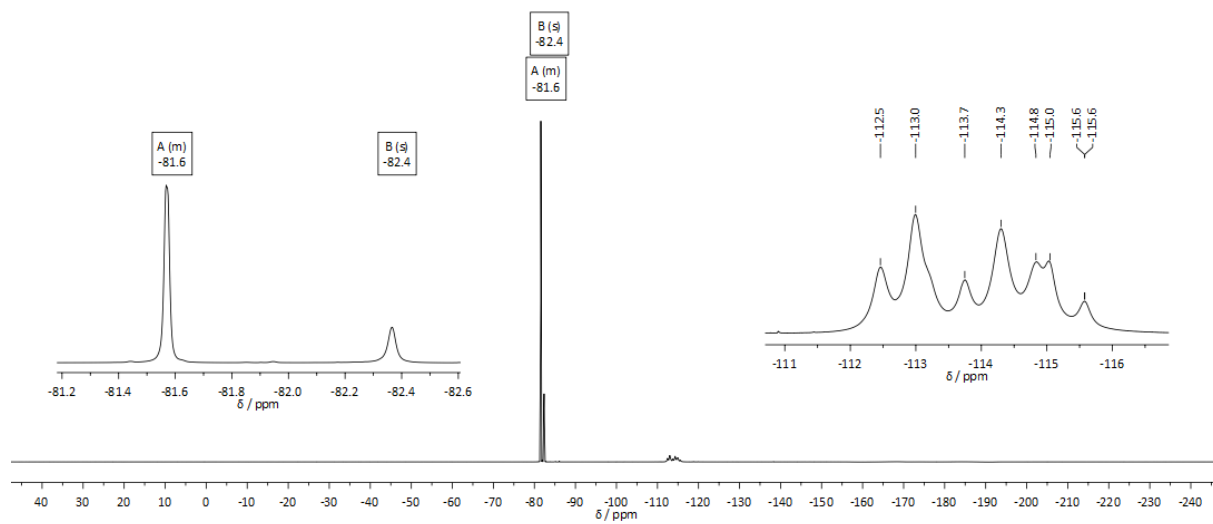

Figure S24  $^{19}\text{F}$  NMR spectrum of **5** in  $\text{CD}_2\text{Cl}_2$ .

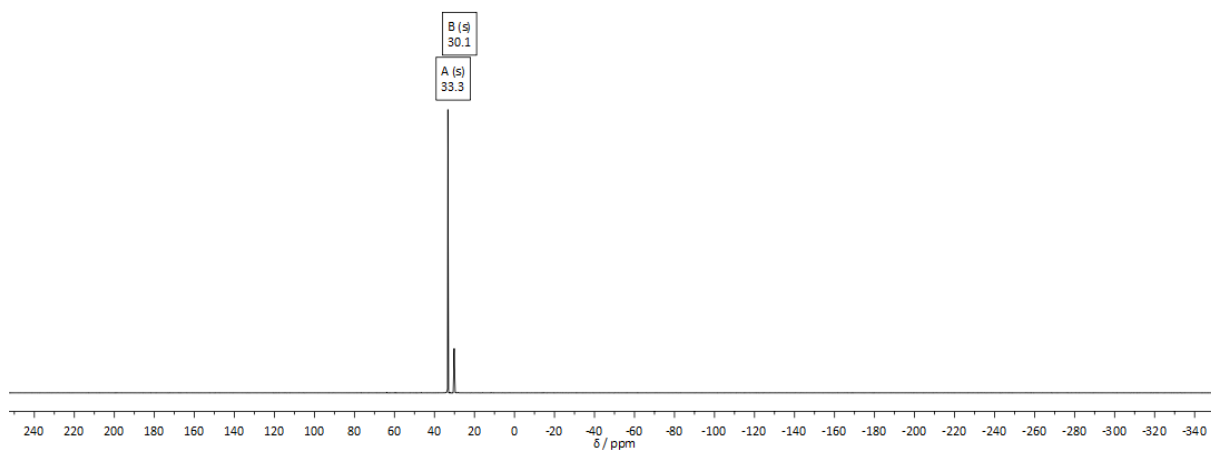

Figure S25  $^{31}\text{P}\{^1\text{H}\}$  NMR spectrum of 5 in  $\text{CD}_2\text{Cl}_2$ .

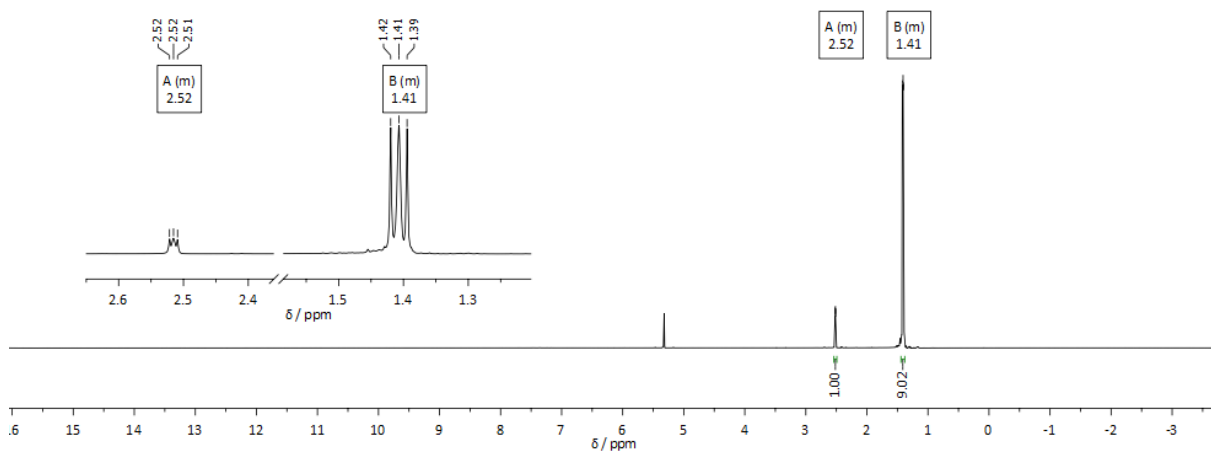

Figure S26  $^1\text{H}$  NMR spectrum of 6 in  $\text{CD}_2\text{Cl}_2$ .

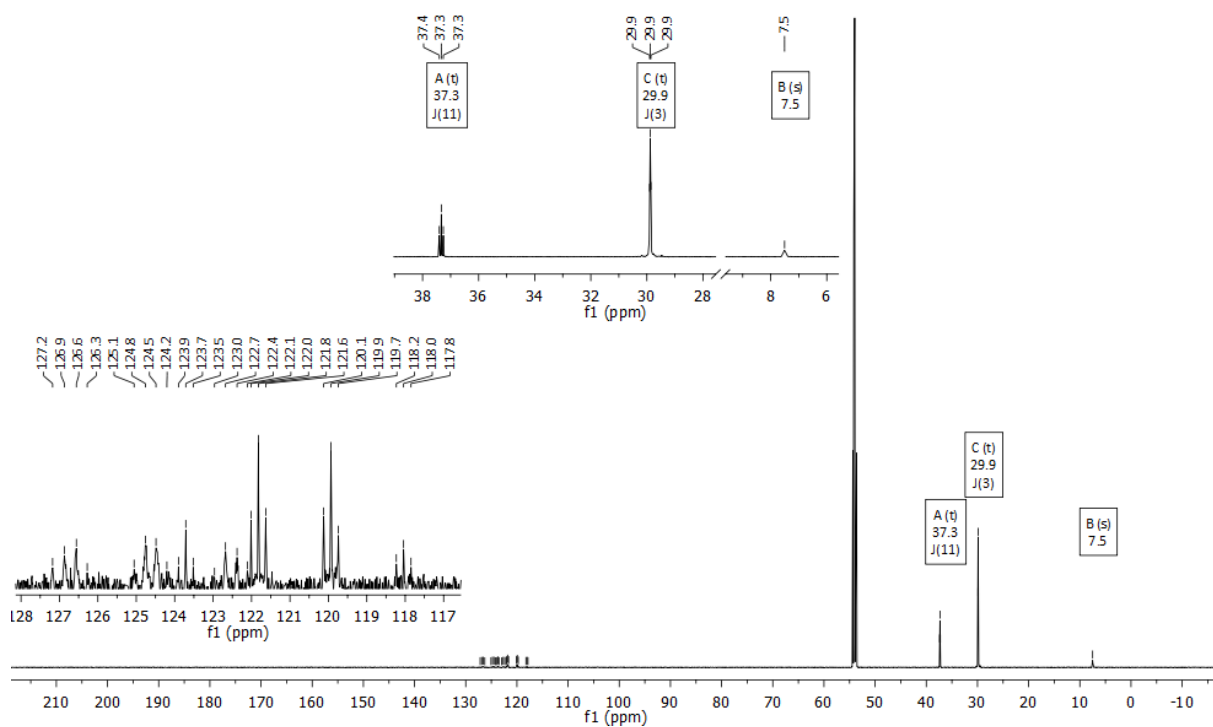

Figure S27  $^{13}\text{C}\{^1\text{H}\}$  NMR spectrum of 6 in  $\text{CD}_2\text{Cl}_2$ .

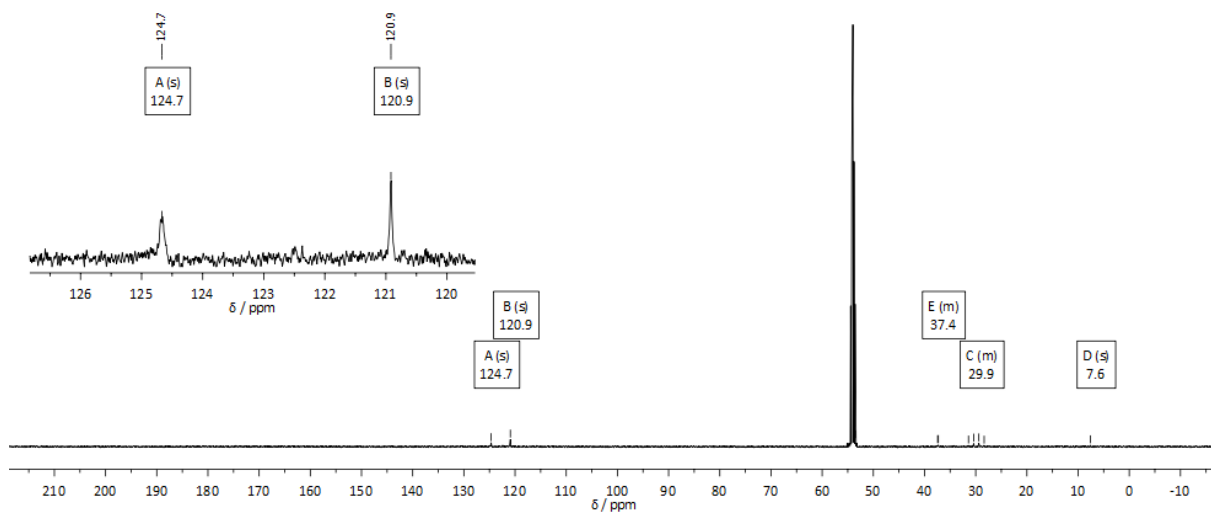

Figure S28  $^{13}\text{C}\{^{19}\text{F}\}$  NMR spectrum of **6** in  $\text{CD}_2\text{Cl}_2$ .

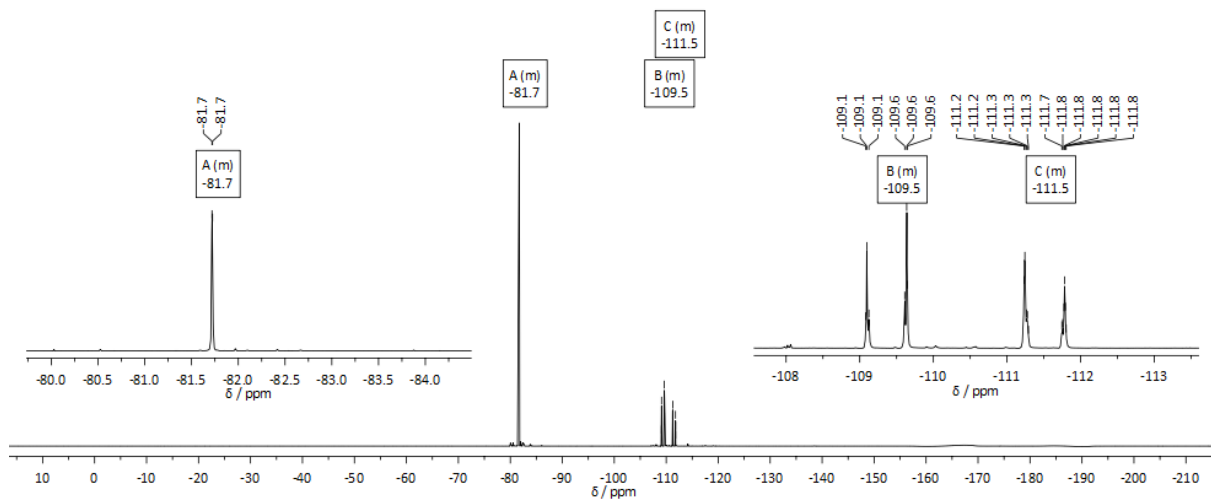

Figure S29  $^{19}\text{F}$  NMR spectrum of **6** in  $\text{CD}_2\text{Cl}_2$ .

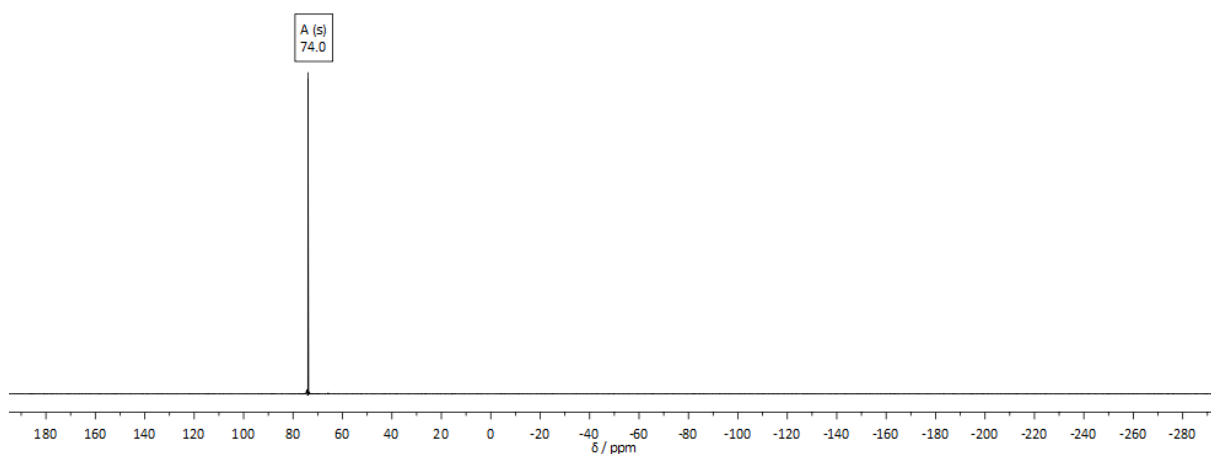

Figure S30  $^{31}\text{P}\{^1\text{H}\}$  NMR spectrum of **6** in  $\text{CD}_2\text{Cl}_2$ .

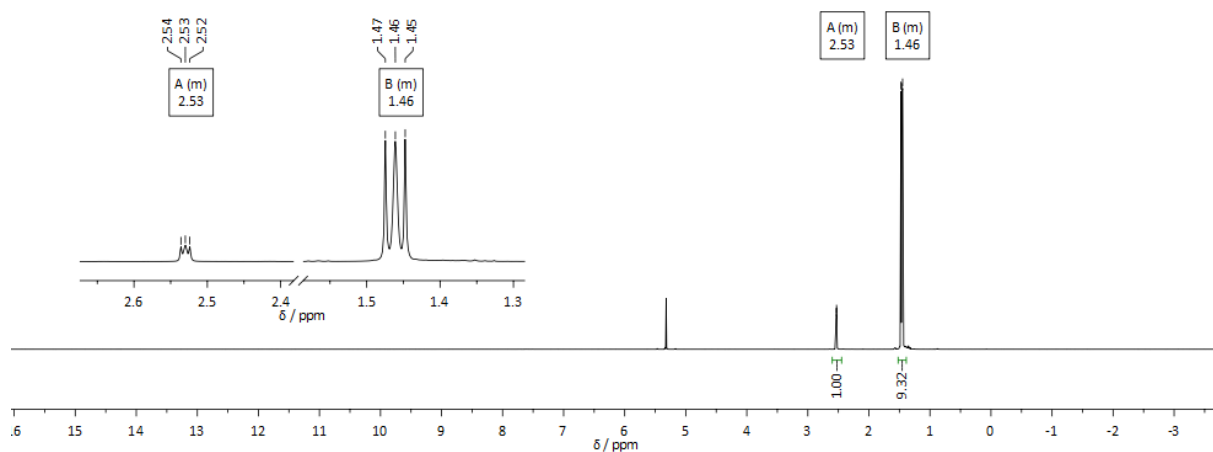

Figure S31  $^1\text{H}$  NMR spectrum of **7** in  $\text{CD}_2\text{Cl}_2$ .

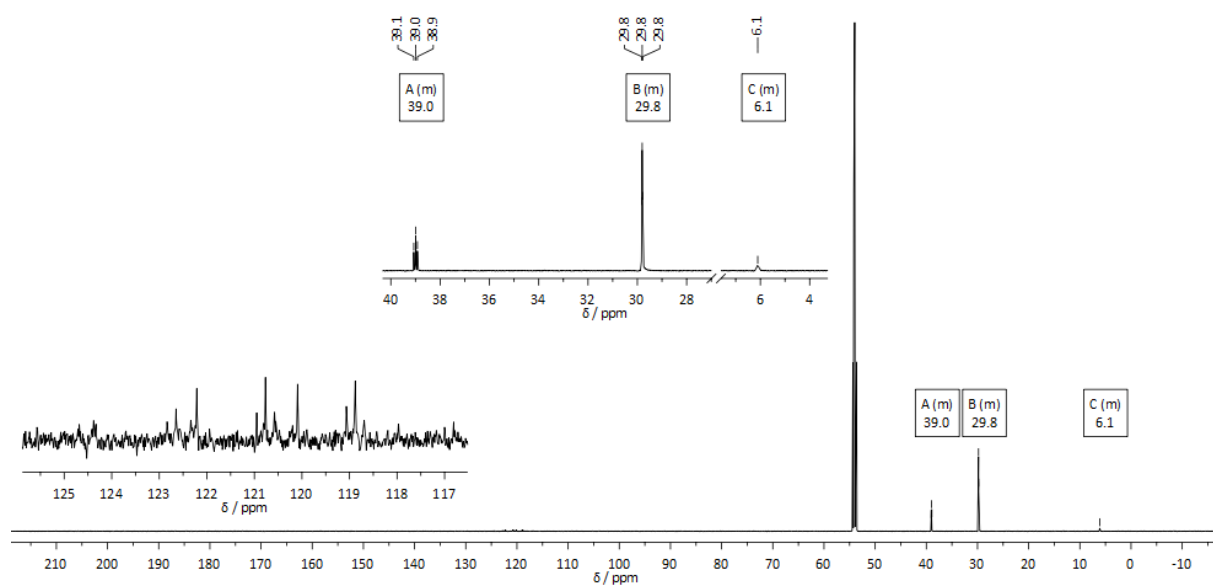

Figure S32  $^{13}\text{C}\{^1\text{H}\}$  NMR spectrum of **7** in  $\text{CD}_2\text{Cl}_2$ .

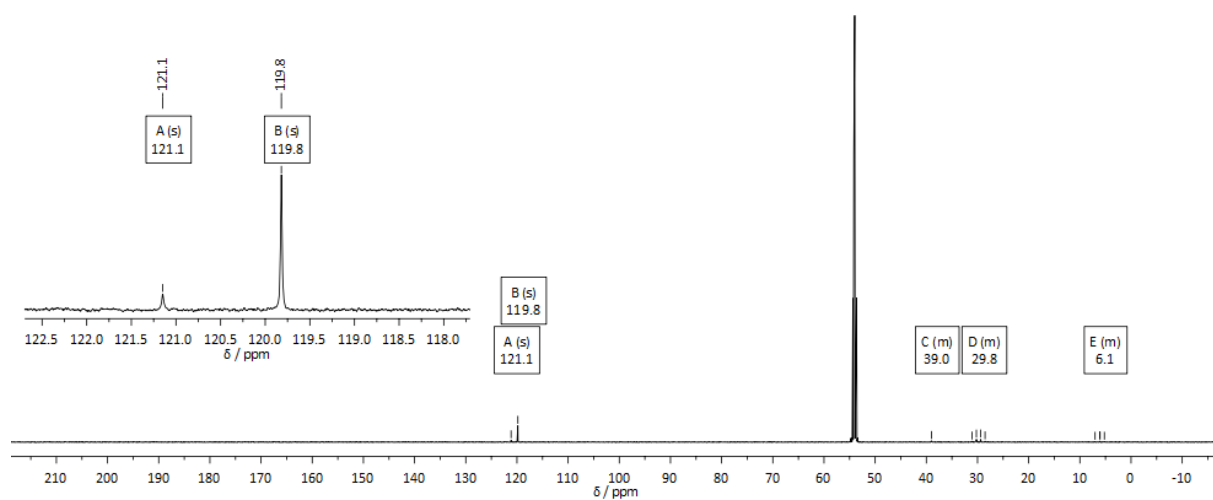

Figure S33  $^{13}\text{C}\{^{19}\text{F}\}$  NMR spectrum of **7** in  $\text{CD}_2\text{Cl}_2$ .

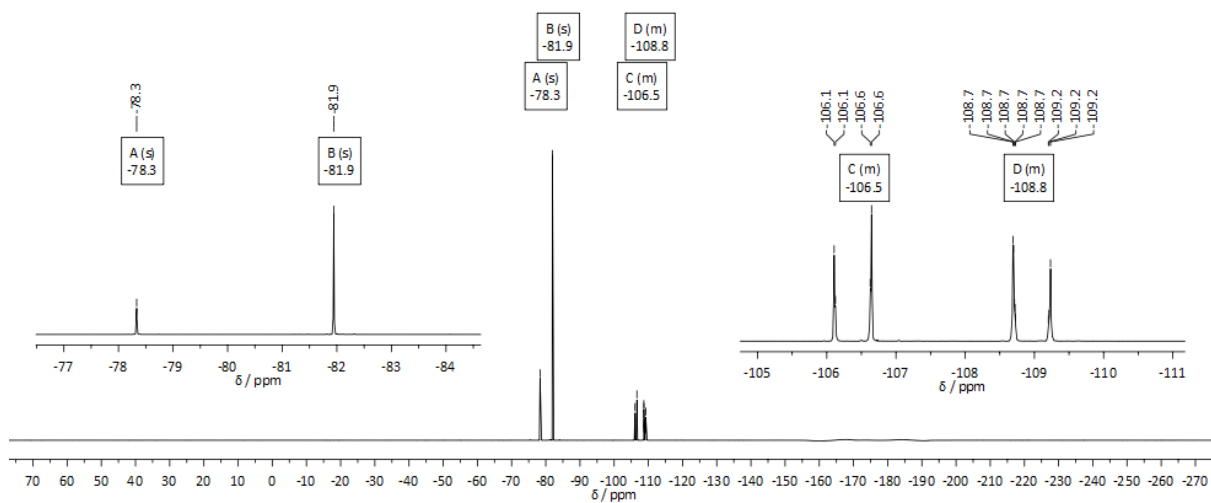

**Figure S34**  $^{19}\text{F}$  NMR spectrum of **7** in  $\text{CD}_2\text{Cl}_2$ .

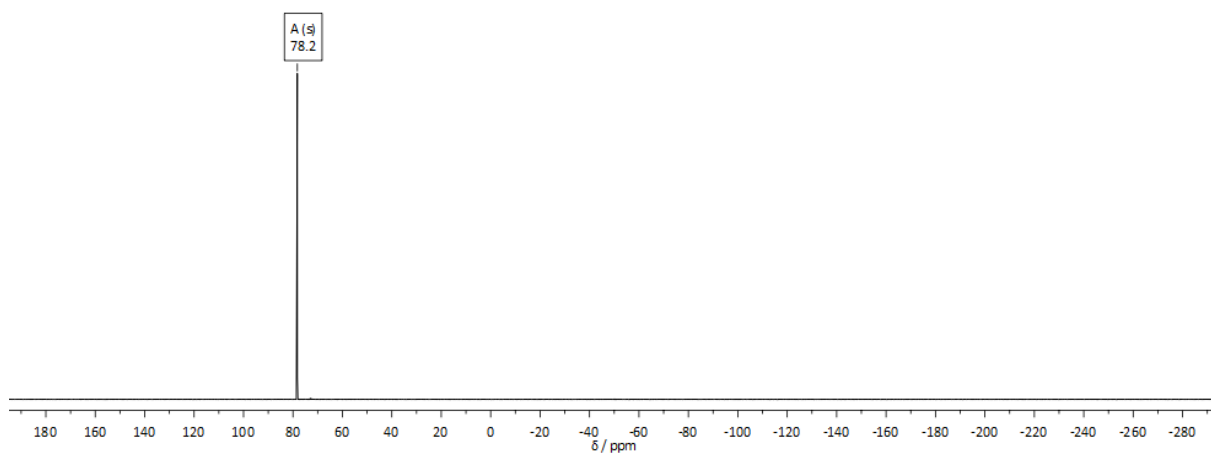

**Figure S35**  $^{31}\text{P}\{^1\text{H}\}$  NMR spectrum of **7** in  $\text{CD}_2\text{Cl}_2$ .

## Supplemental NMR studies

In the following, supplemental NMR studies are listed to examine several aspects.

We performed Lewis acidity tests with the Gutmann-Beckett method<sup>4</sup> with OPET<sub>3</sub> and the modified method for soft Lewis acids with SePMe<sub>3</sub> presented by Lichtenberg.<sup>5</sup> After addition of OPET<sub>3</sub> to **1** (1:1 eq. and 1:5 eq.: OPET<sub>3</sub>:**1**), we do not see any variation of the <sup>31</sup>P{<sup>1</sup>H} NMR chemical shifts of **1** (15.9 ppm) and OPET<sub>3</sub> (50.4 ppm), respectively.

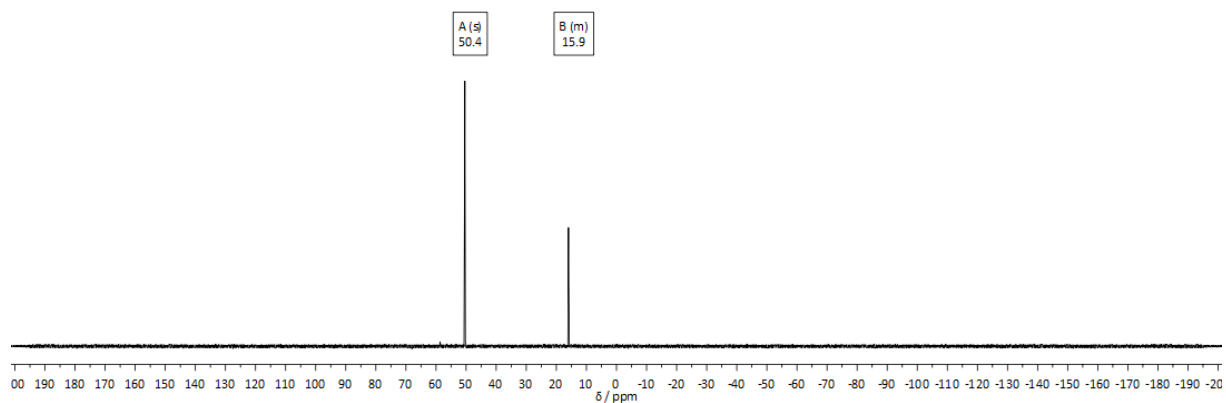

**Figure S36** Gutmann-Beckett test in CD<sub>2</sub>Cl<sub>2</sub> with 1 eq. OPET<sub>3</sub> and 1 eq. **1**.

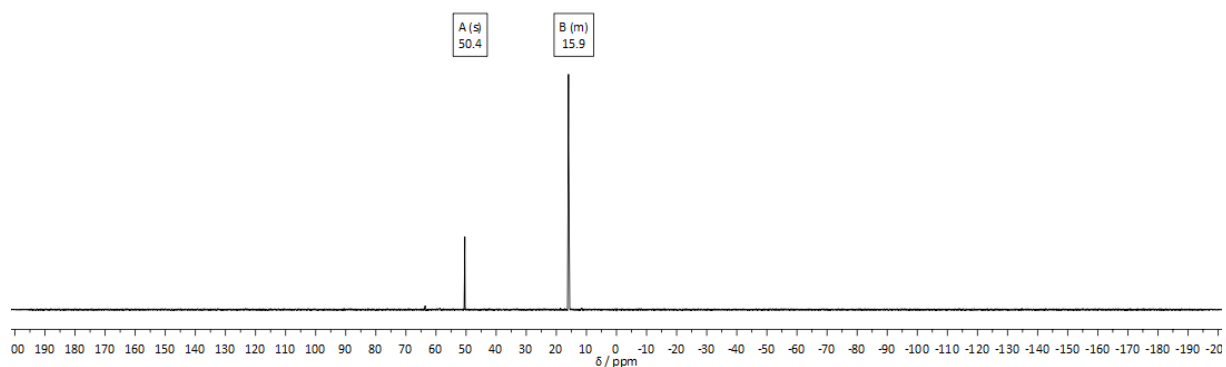

**Figure S37** Gutmann-Beckett test in CD<sub>2</sub>Cl<sub>2</sub> with 1 eq. OPET<sub>3</sub> and 5 eq. **1**.

With the softer Lewis base SePMe<sub>3</sub> (1:1 eq. and 1:5 eq.; SePMe<sub>3</sub>:**1**), we observe a selenium transfer from SePMe<sub>3</sub> (8.8 ppm) to **1** (15.9 ppm) to give (F<sub>5</sub>C<sub>2</sub>)<sub>2</sub>SbCH<sub>2</sub>(Se)P(tBu)<sub>2</sub> (73.0 ppm) and PMe<sub>3</sub> (-61.6 ppm).

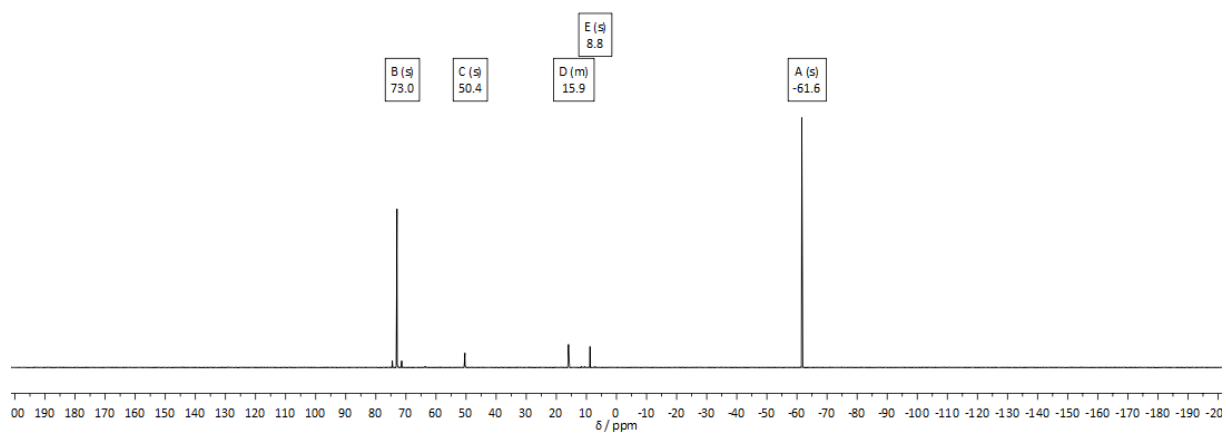

**Figure S38** Modified Gutmann-Beckett test in CD<sub>2</sub>Cl<sub>2</sub> with 1 eq. SePMe<sub>3</sub> and 1 eq. **1**. (OPET<sub>3</sub> is present because of its previous addition in a Gutmann-Beckett test).

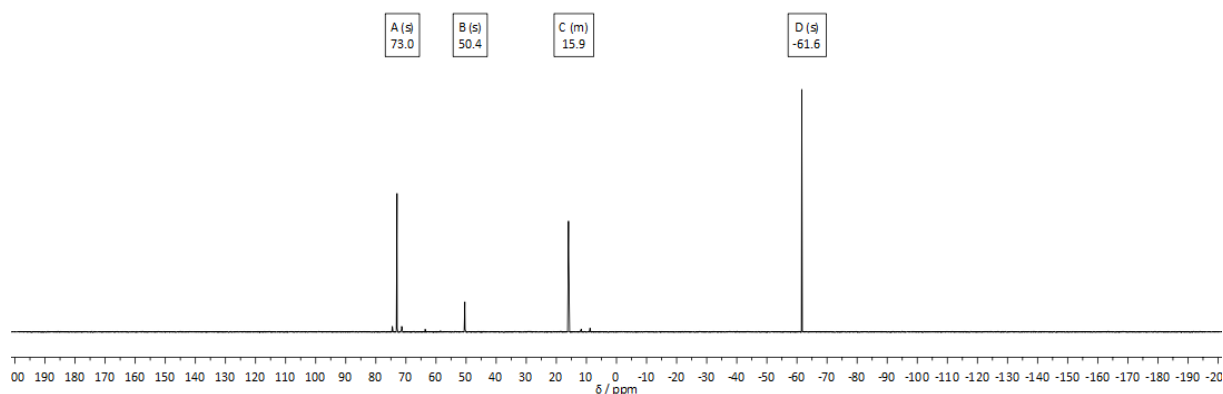

**Figure S39** Modified Gutmann-Beckett test in  $\text{CD}_2\text{Cl}_2$  with 1 eq.  $\text{SePMe}_3$  and 5 eq. **1**. ( $\text{OPeT}_3$  is present because of its previous addition in a Gutmann-Beckett test).

In Figures S40–S42 are reactivity tests of di-*tert*-butylmethylphosphane and the substrates  $\text{CS}_2$ ,  $\text{SO}_2$ ,  $\text{PhNCO}$  and  $\text{PhNCS}$  depicted.  $\text{SO}_2$  and  $\text{PhNCO}$  do not show product formation, whereby  $\text{CS}_2$  and  $\text{PhNCS}$  do. Additional VT-NMR studies show a temperature dependent equilibrium for the reactant/product mixtures, respectively.

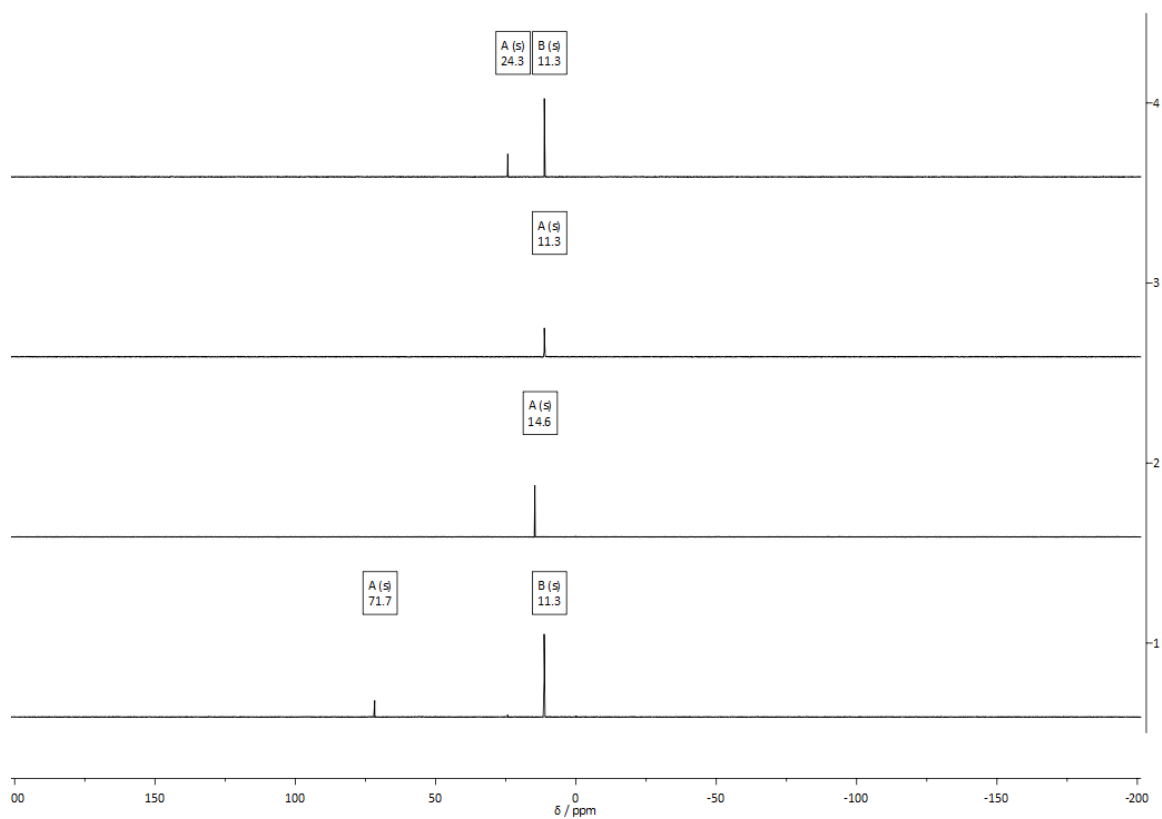

**Figure S40**  $^{31}\text{P}\{^1\text{H}\}$  NMR spectra of mixtures of  $\text{MeP}(\text{tBu})_2$  (11.3 ppm) and  $\text{CS}_2$  (1),  $\text{SO}_2$  (2),  $\text{PhNCO}$  (3) and  $\text{PhNCS}$  (4) in  $\text{C}_6\text{D}_6$ . The slightly shifted reactant peak in 2, may be because of the high excess of  $\text{SO}_2$  in the NMR tube (>1 bar  $\text{SO}_2$ ).

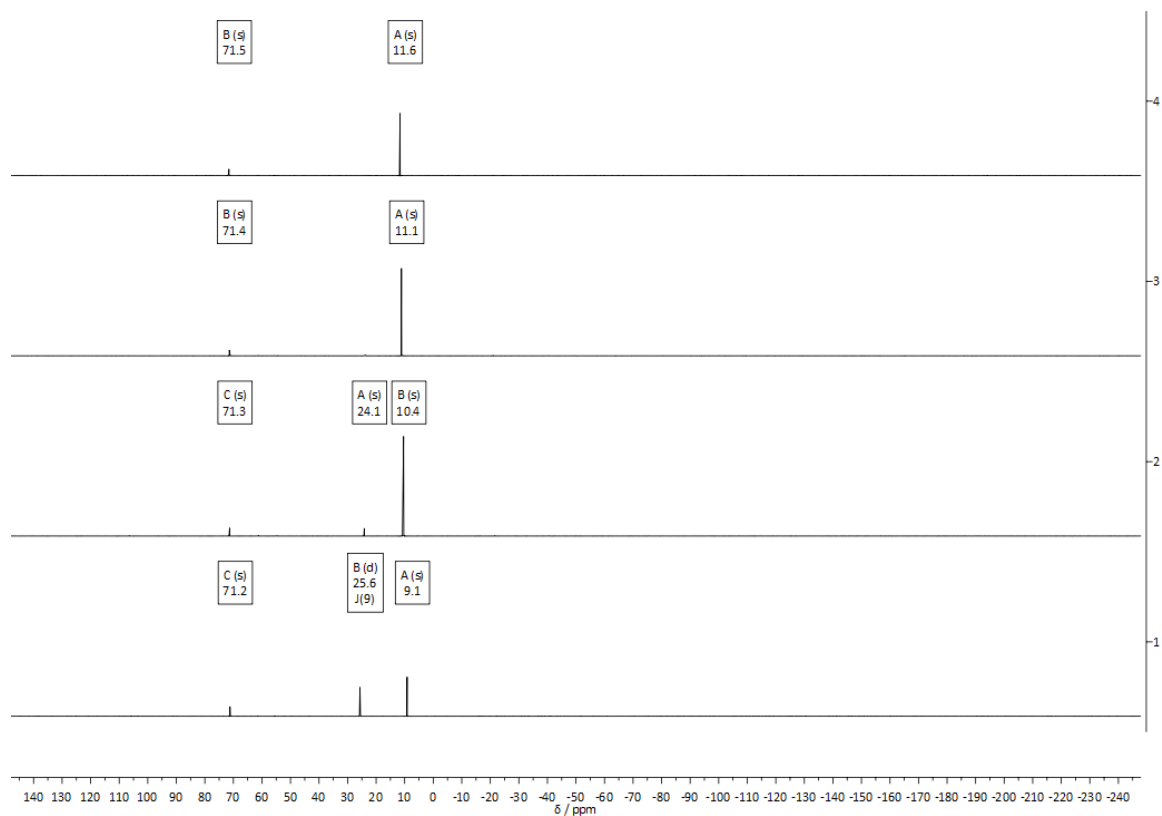

**Figure S41**  $^{31}\text{P}\{^1\text{H}\}$  NMR spectra of a mixture of  $\text{MeP}(t\text{Bu})_2$  (11.1 ppm at 298 K) and  $\text{CS}_2$  at several temperatures (1: 233 K, 2: 273 K, 3: 298 K, 4: 313 K) in  $\text{toluene-}d_8$ .

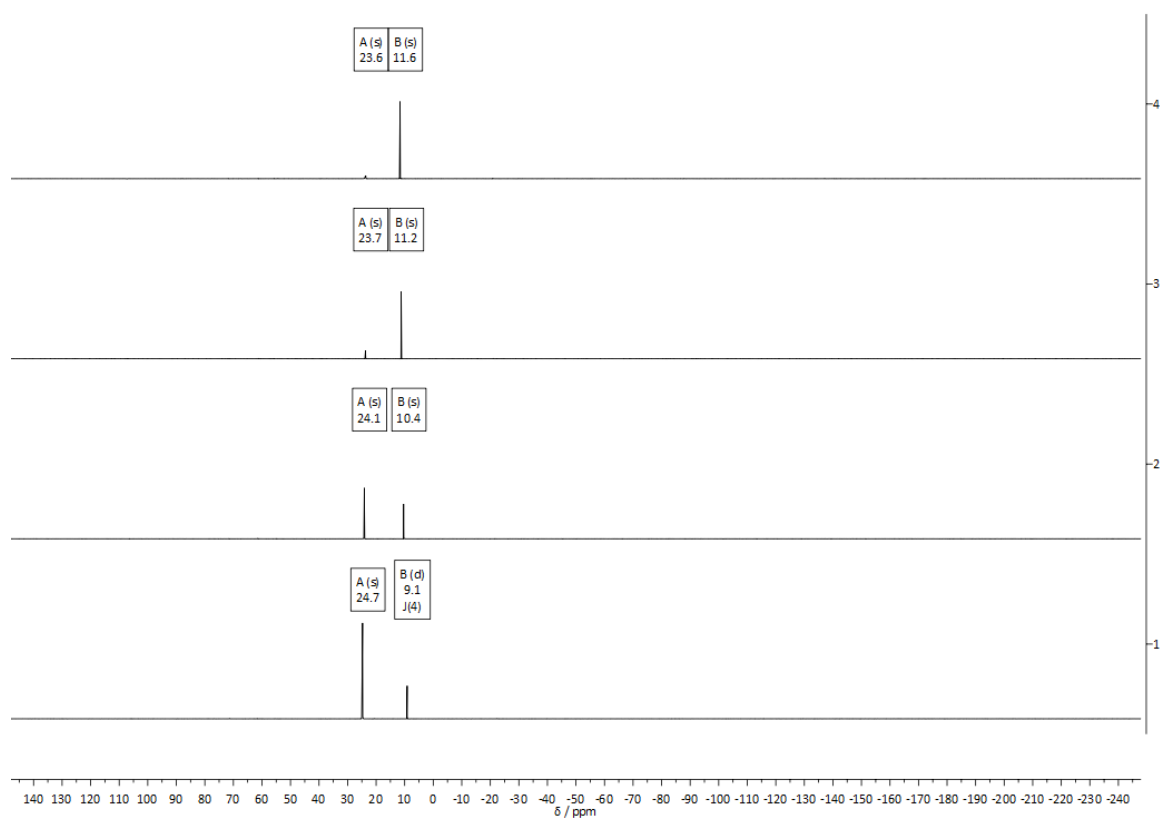

**Figure S42**  $^{31}\text{P}\{^1\text{H}\}$  NMR spectra of a mixture of  $\text{MeP}(t\text{Bu})_2$  (11.2 ppm at 298 K) and  $\text{PhNCS}$  at several temperatures (1: 233 K, 2: 273 K, 3: 298 K, 4: 313 K) in  $\text{toluene-}d_8$ .



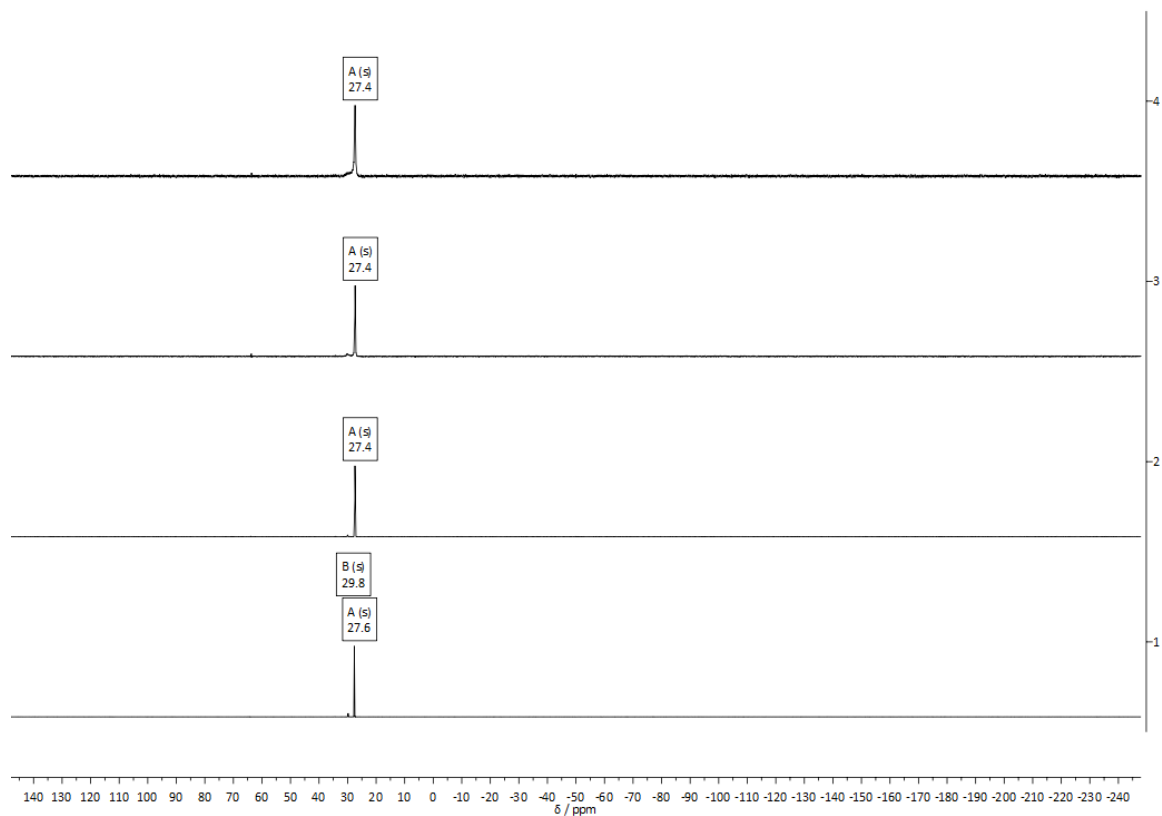

**Figure S43**  $^{31}\text{P}\{^1\text{H}\}$  NMR spectra of **4** at several temperatures (1: 233 K, 2:273 K, 3: 298 K, 4: 318 K) in  $\text{CD}_2\text{Cl}_2$ .

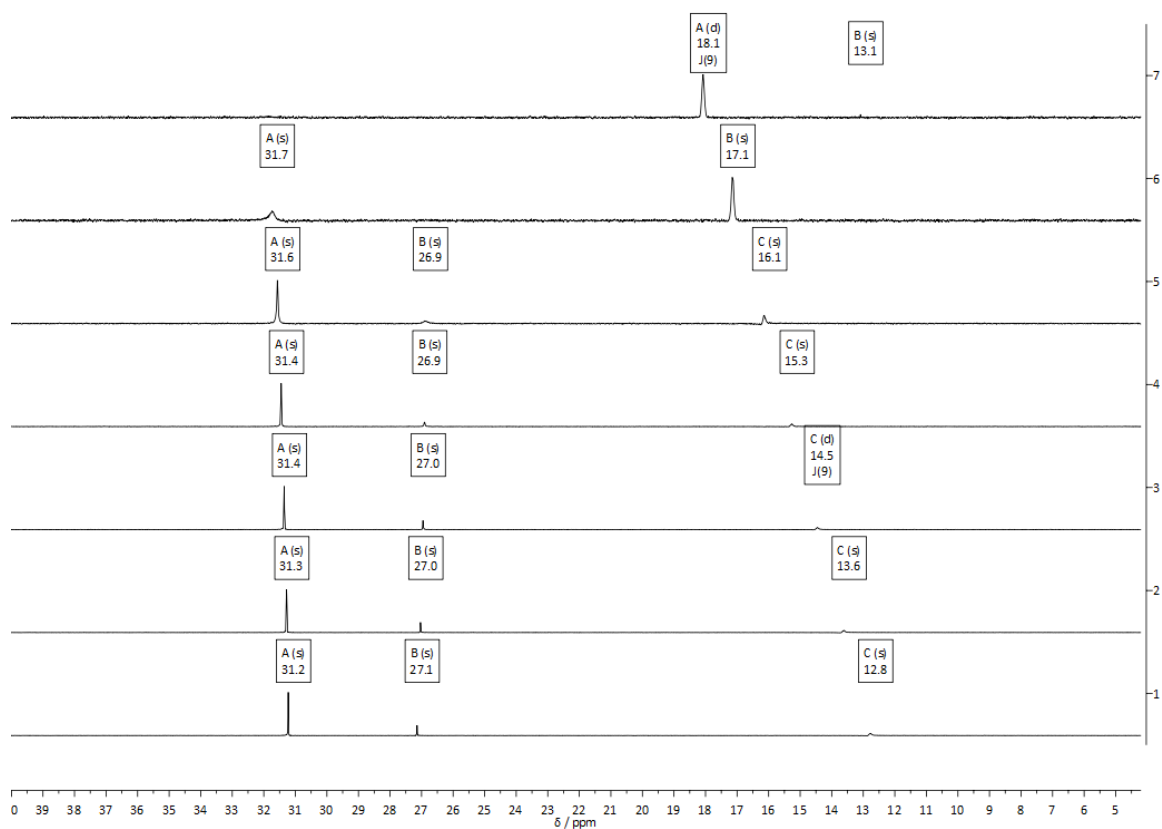

**Figure S44**  $^{31}\text{P}\{^1\text{H}\}$  NMR spectra of **5a/b** at several temperatures (1: 233 K, 2:253 K, 3: 273 K, 4: 293 K, 5: 313 K, 6: 333 K, 7: 353 K) in toluene- $d_8$ . The concentration of **1** (15.3 ppm at 293 K) increases by increasing temperature, while the concentration of **5a** (31.4 ppm at 293 K) and **5b** (26.9 ppm at 293 K) decreases. The ratio of **5a/b** seems to be the same at all temperatures.

## IR Spectroscopy Data

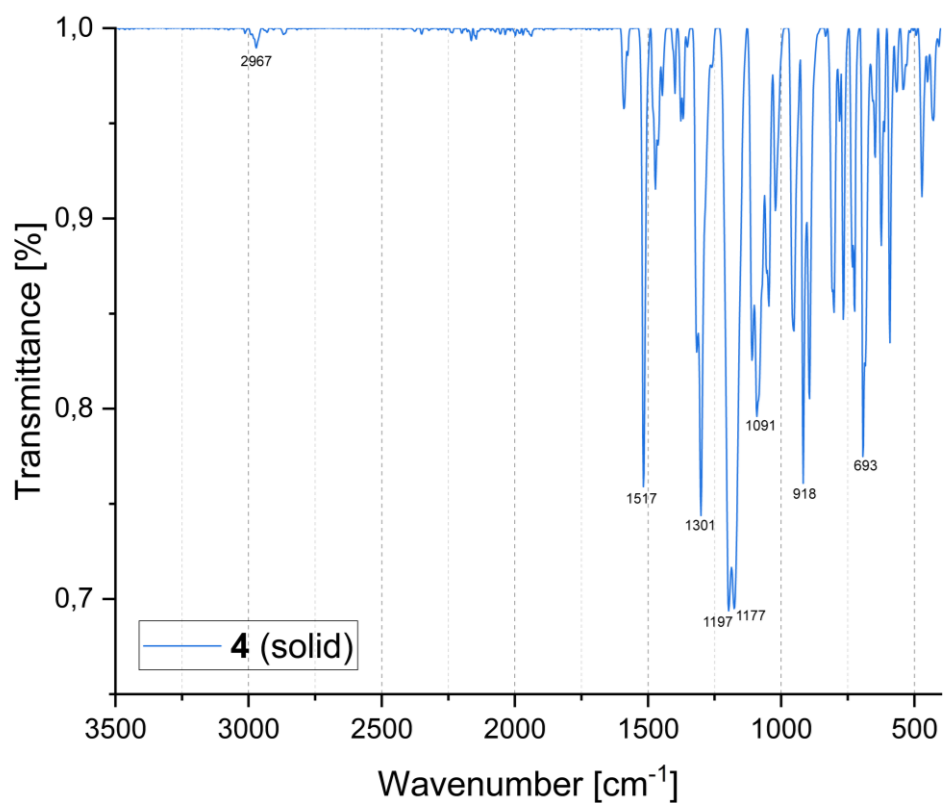

Figure S45 IR spectrum of 4 as solid; some bands were labelled with their respective wavenumber.

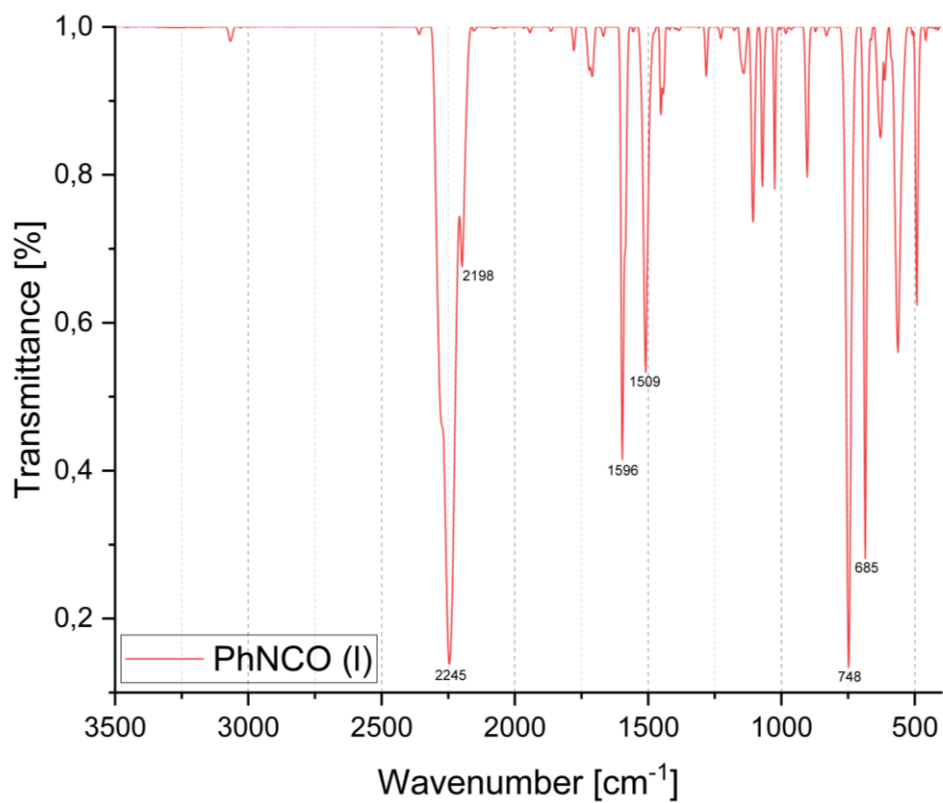

Figure S46 IR spectrum of phenyl isocyanate; some bands were labelled with their respective wavenumber.

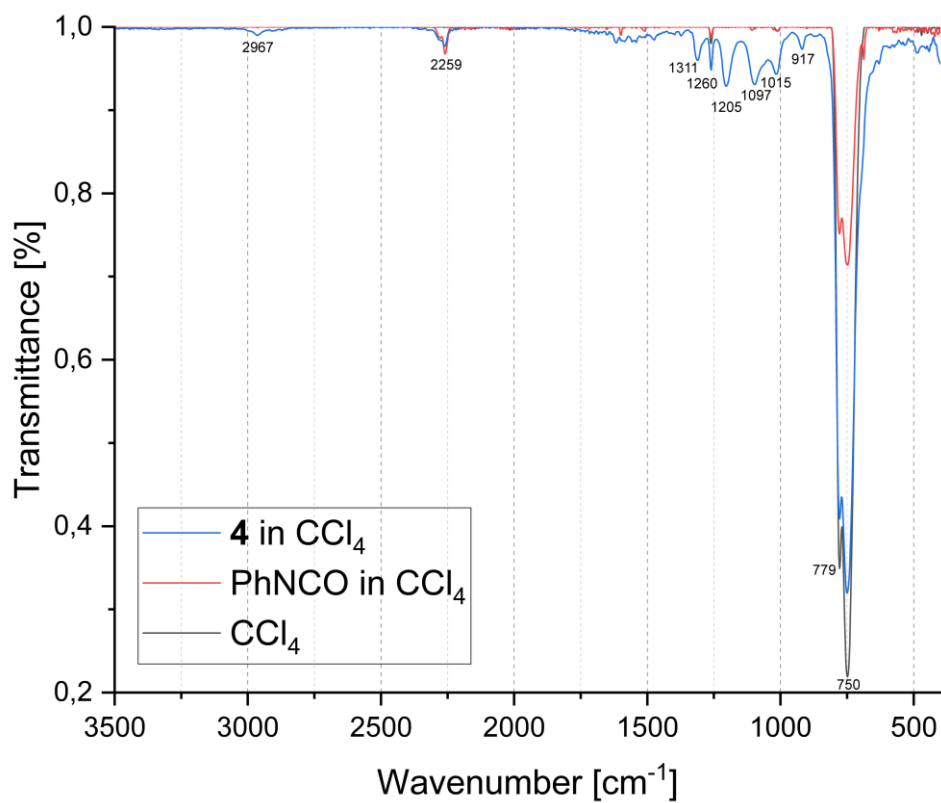

**Figure S47** IR spectra of solutions of **4** and PhNCO in CCl<sub>4</sub> and of the solvent CCl<sub>4</sub>; some bands were labelled with their respective wavenumber. Note that the solutions have different concentrations.

## Crystallographic Data

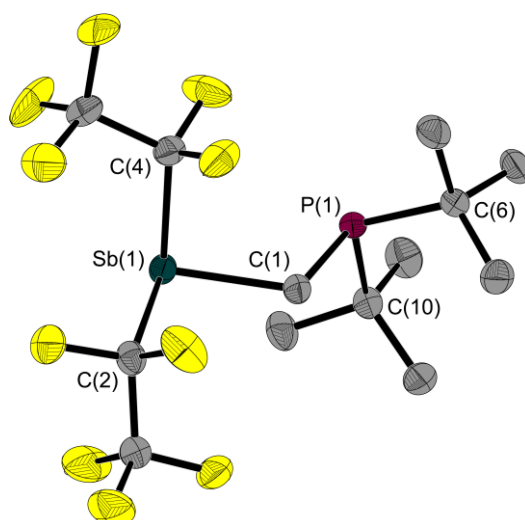

**Figure S48** Molecular structure of **1** in the solid state. Ellipsoids are set at 50 % probability; hydrogen atoms and minor occupied disordered atoms are omitted for clarity. Selected bond lengths and interatomic distances [Å] and angles [°]: Sb(1)–C(1) 2.157(1), Sb(1)–C(2) 2.238(1), Sb(1)–C(4) 2.217(2), P(1)–C(1) 1.860(1), P(1)–C(6) 1.891(1), P(1)–C(10) 1.886(1), Sb(1)⋯P(1) 3.306(1); C(1)–Sb(1)–C(2) 93.2(1), C(1)–Sb(1)–C(4) 91.3(1), C(4)–Sb(1)–C(2) 95.8(1), C(1)–P(1)–C(6) 100.2(1), C(1)–P(1)–C(10) 101.6(1), C(10)–P(1)–C(6) 111.3(1), P(1)–C(1)–Sb(1) 110.6(1).

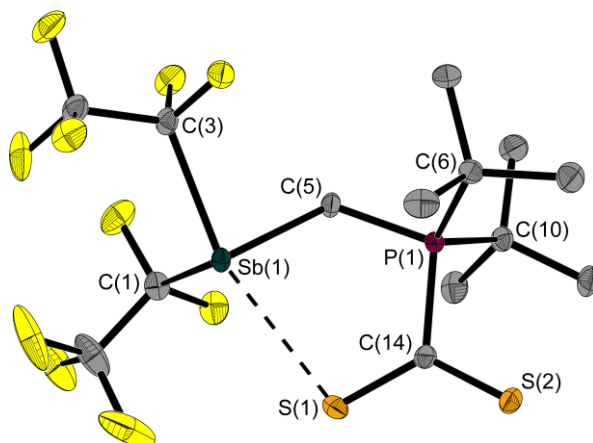

**Figure S49** Molecular structure of compound **2** in the solid state. Ellipsoids are set at 50 % probability; hydrogen atoms are omitted for clarity. Selected bond lengths and interatomic distances [Å] and angles [°]: Sb(1)–C(1) 2.265(2), Sb(1)–C(3) 2.293(2), Sb(1)–C(5) 2.193(2), P(1)–C(5) 1.791(2), P(1)–C(6) 1.870(2), P(1)–C(10) 1.875(2), P(1)–C(14) 1.844(2), S(1)–C(14) 1.681(2), S(2)–C(14) 1.657(2), Sb(1)–S(1) 2.964(1); C(1)–Sb(1)–C(3) 91.1(1), C(5)–Sb(1)–C(1) 90.4(1), C(5)–Sb(1)–C(3) 85.9(1), C(5)–P(1)–C(14) 108.4(1), P(1)–C(5)–Sb(1) 115.2(1), S(1)–C(14)–P(1) 116.6(1), S(2)–C(14)–S(1) 127.1(1), S(2)–C(14)–P(1) 116.3(1), S(1)–Sb(1)–C(3) 160.8(1).

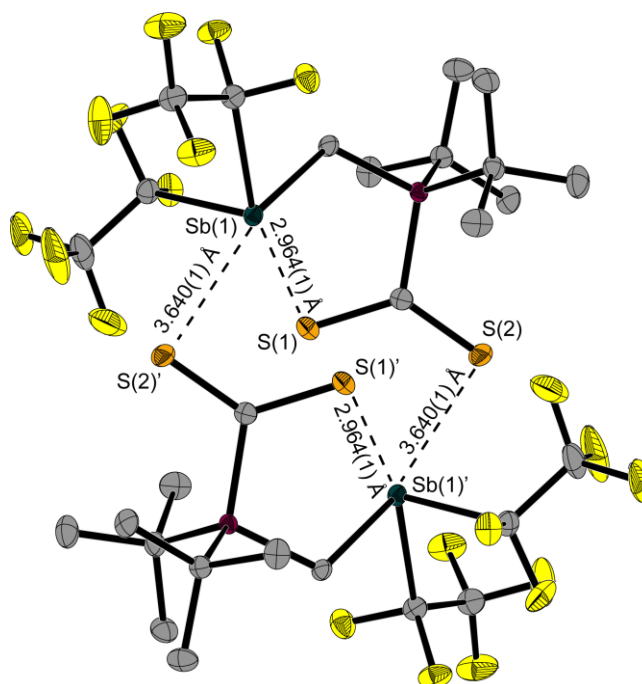

**Figure S50** Molecular structure of a dimer of **2**; second molecule was symmetry generated (1-x, 1-y, 1-z). Ellipsoids are set at 50 % probability; hydrogen atoms are omitted for clarity.

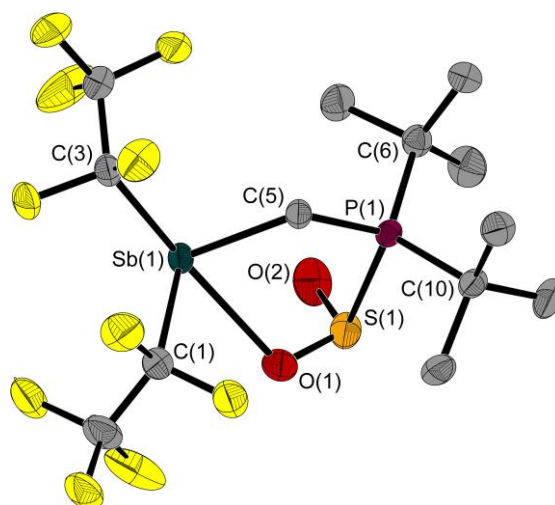

**Figure S51** Molecular structure of compound **3** in the solid state. Ellipsoids are set at 50 % probability; hydrogen atoms and minor occupied disordered atoms are omitted for clarity. Selected bond lengths [Å] and angles [°]: Sb(1)-O(1) 2.483(2), Sb(1)-C(1) 2.242(3), Sb(1)-C(3) 2.281(3), Sb(1)-C(5) 2.199(2), S(1)-P(1) 2.285(1), S(1)-O(1) 1.498(2), S(1)-O(2) 1.470(2), P(1)-C(5) 1.803(2), P(1)-C(6) 1.852(3), P(1)-C(10) 1.857(2); C(1)-Sb(1)-O(1) 77.1(1), C(1)-Sb(1)-C(3) 87.7(1), C(3)-Sb(1)-O(1) 158.5(1), C(5)-Sb(1)-O(1) 78.0(1), C(5)-Sb(1)-C(1) 95.5(1), C(5)-Sb(1)-C(3) 88.6(1), O(1)-S(1)-P(1) 95.1(1), O(2)-S(1)-P(1) 102.8(1), O(2)-S(1)-O(1) 111.8(1), C(5)-P(1)-S(1) 104.3(1), S(1)-O(1)-Sb(1) 112.9(1), P(1)-C(5)-Sb(1) 114.9(1).

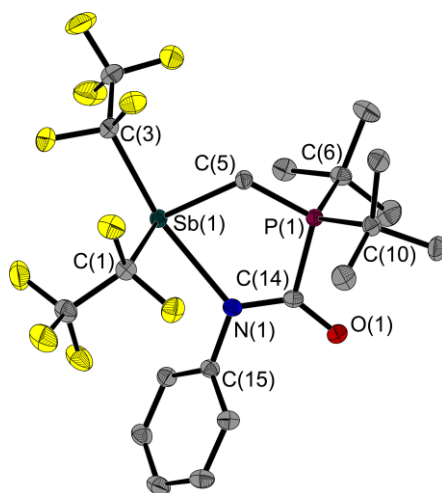

**Figure S52** Molecular structure of compound **4** in the solid state. Ellipsoids are set at 50 % probability; hydrogen atoms are omitted for clarity. Selected bond lengths [Å] and angles [°]: Sb(1)–N(1) 2.473(1), Sb(1)–C(1) 2.253(1), Sb(1)–C(3) 2.332(1), Sb(1)–C(5) 2.180(1), P(1)–C(5) 1.792(1), P(1)–C(6) 1.856(1), P(1)–C(10) 1.852(1), P(1)–C(14) 1.860(1), O(1)–C(14) 1.243(2), N(1)–C(14) 1.322(2), N(1)–C(15) 1.428(2); C(1)–Sb(1)–N(1) 84.0(1), C(3)–Sb(1)–N(1) 159.7(1), C(5)–Sb(1)–N(1) 78.1(1), C(5)–P(1)–C(14) 108.0(1), C(14)–N(1)–Sb(1) 121.5(1), C(14)–N(1)–C(15) 117.7(1), C(15)–N(1)–Sb(1) 120.8(1), P(1)–C(5)–Sb(1) 113.6(1), O(1)–C(14)–P(1) 116.7(1), O(1)–C(14)–N(1) 132.0(1), N(1)–C(14)–P(1) 111.3(1).

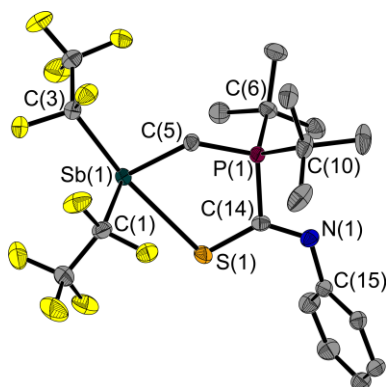

**Figure S53** Molecular structure of compound **5a** in the solid state. Only one of the two molecules in the asymmetric unit is shown. Ellipsoids are set at 50 % probability; hydrogen atoms are omitted for clarity. Selected bond lengths [Å] and angles [°]: Sb(1)–S(1) 2.881(1), Sb(1)–C(1) 2.243(2), Sb(1)–C(3) 2.311(2), Sb(1)–C(5) 2.172(2), S(1)–C(14) 1.713(2), P(1)–C(5) 1.792(2), P(1)–C(6) 1.856(2), P(1)–C(10) 1.857(2), P(1)–C(14) 1.837(2), N(1)–C(14) 1.289(2), N(1)–C(15) 1.419(2); C(1)–Sb(1)–S(1) 86.1(1), C(3)–Sb(1)–S(1) 164.7(1), C(5)–Sb(1)–S(1) 80.1(1), C(14)–S(1)–Sb(1) 102.8(1), C(5)–P(1)–C(14) 109.4(1), C(14)–N(1)–C(15) 122.2(2), P(1)–C(5)–Sb(1) 119.3(1), S(1)–C(14)–P(1) 118.0(1), N(1)–C(14)–S(1) 131.8(1), N(1)–C(14)–P(1) 110.2(1).

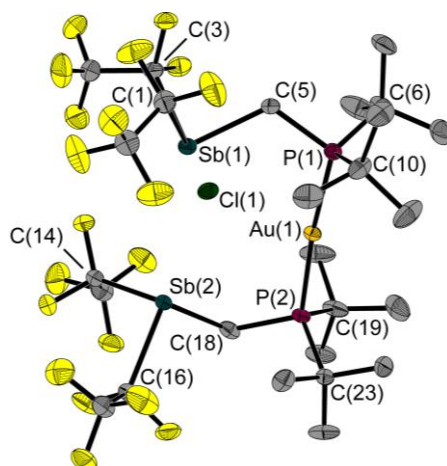

**Figure S54** Molecular structure of compound **6** in the solid state. Ellipsoids are set at 50 % probability; hydrogen atoms and minor occupied disordered atoms are omitted for clarity. Selected bond lengths and interatomic distances [Å] and angles [°]: Au(1)–P(1) 2.311(1), Au(1)–P(2) 2.319(1), Sb(1)–C(1) 2.309(3), Sb(1)–C(3) 2.259(3), Sb(1)–C(5) 2.169(2), Sb(2)–C(14) 2.173(5), Sb(2)–C(16) 2.310(3), Sb(2)–C(18) 2.153(3), P(1)–C(5) 1.823(3), P(2)–C(18) 1.826(3), Au(1)⋯Cl(1) 2.939(1), Cl(1)⋯Sb(1) 2.966(1), Cl(1)⋯Sb(2) 2.981(1); P(1)–Au(1)–P(2) 174.6(1), C(3)–Sb(1)–C(1) 89.7(1), C(5)–Sb(1)–C(1) 93.3(1), C(5)–Sb(1)–C(3) 86.9(1), C(14)–Sb(2)–C(16) 89.8(1), C(18)–Sb(2)–C(16) 91.0(1), C(18)–Sb(2)–C(14) 107.1(2), C(5)–P(1)–Au(1) 112.7(1), C(18)–P(2)–Au(1) 113.7(1), P(1)–C(5)–Sb(1) 118.6(1), P(2)–C(18)–Sb(2) 117.8(1), Sb(1)⋯P(1)⋯P(2)⋯Sb(2) 4.8(1).

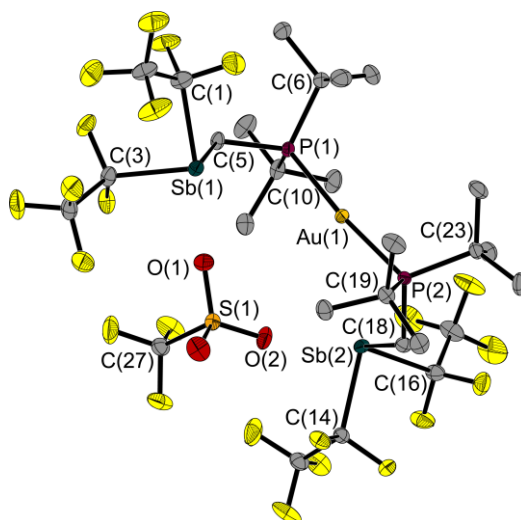

**Figure S55** Molecular structure of compound **7** in the solid state. Ellipsoids are set at 50 % probability; hydrogen atoms are omitted for clarity. Selected bond lengths and interatomic distances [Å] and angles [°]: Au(1)–P(1) 2.328(1), Au(1)–P(2) 2.328(1), Sb(1)–C(1) 2.275(2), Sb(1)–C(3) 2.254(2), Sb(1)–C(5) 2.164(2), Sb(2)–C(14) 2.254(2), Sb(2)–C(16) 2.268(2), Sb(2)–C(18) 2.172(2), P(1)–C(5) 1.826(2), P(2)–C(18) 1.831(2), Au(1)⋯O(2) 3.521(2), O(1)⋯Sb(1) 2.647(2), O(2)⋯Sb(2) 2.808(2); P(1)–Au(1)–P(2) 173.9(1), C(3)–Sb(1)–C(1) 92.3(1), C(5)–Sb(1)–C(1) 91.8(1), C(5)–Sb(1)–C(3) 87.1(1), C(14)–Sb(2)–C(16) 89.8(1), C(18)–Sb(2)–C(16) 96.7(1), C(18)–Sb(2)–C(14) 87.6(1), C(5)–P(1)–Au(1) 116.8(1), C(18)–P(2)–Au(1) 111.7(1), P(1)–C(5)–Sb(1) 120.4(2), P(2)–C(18)–Sb(2) 115.8(2), Sb(1)⋯P(1)⋯P(2)⋯Sb(2) 111.1(1).

### X-Ray Diffraction Studies

Single crystals were examined on a Rigaku Supernova diffractometer. Using Olex2,<sup>6</sup> the structures were solved with the ShelXT<sup>7</sup> structure solution program using Intrinsic Phasing and refined with the ShelXL<sup>8</sup> refinement package using Least Squares minimisation, **7** was refined with the olex2.refine<sup>9</sup> refinement package using Gauss-Newton minimisation. Refinement using NoSpherA2,<sup>10</sup> an implementation of Non-SPHERical Atom-form-factors in Olex2. The following options were used: SOFTWARE: ORCA 5.0, PARTITIONING: NoSpherA2, INT ACCURACY: Normal, METHOD: R2SCAN, BASIS SET: x2c-TZVP, CHARGE: 0, MULTIPLICITY: 1.

A single crystal of **1** was in situ grown by manually generating a seed at 283.9 K and subsequent cooling to 260 K with 1 K/h and with 50 K/h to 100 K.

Crystals of **2** precipitated from solution during the synthesis.

Solutions of **3** (*n*-hexane) and **4** (CD<sub>2</sub>Cl<sub>2</sub>) were cooled to -20 °C, whereupon crystals suitable for diffraction experiments formed.

Single crystals of **5a**, **6** and **7** were grown from saturated solutions in *n*-hexane (**5**), CD<sub>2</sub>Cl<sub>2</sub> (**6**) and C<sub>6</sub>D<sub>6</sub> (**7**).

CCDC 2350371-2350377 contain the supplementary crystallographic data for this paper. These data can be obtained free of charge from The Cambridge Crystallographic Data Centre via <http://www.ccdc.cam.ac.uk/conts/retrieving.html>



|                                                                                      | FLP <b>1</b> <sup>[a]</sup>                         | FLP·CS <sub>2</sub> <b>2</b> <sup>[b]</sup>                        | FLP·SO <sub>2</sub> <b>3</b> <sup>[c]</sup>                         | FLP·PhNCO <b>4</b>                                    |
|--------------------------------------------------------------------------------------|-----------------------------------------------------|--------------------------------------------------------------------|---------------------------------------------------------------------|-------------------------------------------------------|
| Empirical formula                                                                    | C <sub>13</sub> H <sub>20</sub> F <sub>10</sub> PSb | C <sub>14</sub> H <sub>20</sub> F <sub>10</sub> PS <sub>2</sub> Sb | C <sub>13</sub> H <sub>20</sub> O <sub>2</sub> F <sub>10</sub> PSSb | C <sub>20</sub> H <sub>25</sub> F <sub>10</sub> NOPSb |
| <i>M<sub>r</sub></i>                                                                 | 519.01                                              | 595.14                                                             | 583.07                                                              | 638.13                                                |
| $\lambda$ [Å]                                                                        | 0.71073                                             | 0.71073                                                            | 0.71073                                                             | 0.71073                                               |
| <i>T</i> [K]                                                                         | 100.0(1)                                            | 100.0(1)                                                           | 100.0(1)                                                            | 100.0(1)                                              |
| <i>F</i> (000) [e]                                                                   | 2032                                                | 584                                                                | 2288                                                                | 1264                                                  |
| Crystal system                                                                       | orthorhombic                                        | triclinic                                                          | orthorhombic                                                        | monoclinic                                            |
| Space group                                                                          | <i>Pbca</i>                                         | <i>P</i> $\bar{1}$                                                 | <i>Pbca</i>                                                         | <i>P</i> 2 <sub>1</sub> / <i>c</i>                    |
| <i>a</i> [Å]                                                                         | 16.0957(2)                                          | 8.6271(6)                                                          | 17.0497(5)                                                          | 15.3875(2)                                            |
| <i>b</i> [Å]                                                                         | 11.6873(1)                                          | 11.2928(9)                                                         | 11.9276(3)                                                          | 11.5169(1)                                            |
| <i>c</i> [Å]                                                                         | 20.2429(2)                                          | 12.0061(10)                                                        | 20.3495(6)                                                          | 14.6407(2)                                            |
| $\alpha$ [°]                                                                         | 90                                                  | 74.243(7)                                                          | 90                                                                  | 90                                                    |
| $\beta$ [°]                                                                          | 90                                                  | 74.812(7)                                                          | 90                                                                  | 106.704(1)                                            |
| $\gamma$ [°]                                                                         | 90                                                  | 70.602(7)                                                          | 90                                                                  | 90                                                    |
| <i>V</i> [Å <sup>3</sup> ]                                                           | 3808.00(7)                                          | 1042.64(15)                                                        | 4138.3(2)                                                           | 2485.09(5)                                            |
| <i>Z</i>                                                                             | 8                                                   | 2                                                                  | 8                                                                   | 4                                                     |
| $\rho_{\text{calcd.}}$ [g cm <sup>-3</sup> ]                                         | 1.811                                               | 1.896                                                              | 1.872                                                               | 1.706                                                 |
| $\mu$ [mm <sup>-1</sup> ]                                                            | 1.619                                               | 1.685                                                              | 1.605                                                               | 1.262                                                 |
| 2 $\theta$ range [°]                                                                 | 5.896–73.81                                         | 5.508–65.616                                                       | 4.004–60.16                                                         | 4.488–68.784                                          |
| Index ranges <i>h</i>                                                                | –26 ≤ <i>h</i> ≤ 26                                 | –9 ≤ <i>h</i> ≤ 12                                                 | –24 ≤ <i>h</i> ≤ 24                                                 | –24 ≤ <i>h</i> ≤ 24                                   |
| Index ranges <i>k</i>                                                                | –19 ≤ <i>k</i> ≤ 19                                 | –16 ≤ <i>k</i> ≤ 16                                                | –16 ≤ <i>k</i> ≤ 16                                                 | –17 ≤ <i>k</i> ≤ 18                                   |
| Index ranges <i>l</i>                                                                | –33 ≤ <i>l</i> ≤ 34                                 | –18 ≤ <i>l</i> ≤ 17                                                | –28 ≤ <i>l</i> ≤ 28                                                 | –23 ≤ <i>l</i> ≤ 23                                   |
| Reflexes collected                                                                   | 186026                                              | 13487                                                              | 77118                                                               | 147790                                                |
| Independent reflexes                                                                 | 9432                                                | 6656                                                               | 6082                                                                | 10161                                                 |
| <i>R</i> <sub>int</sub>                                                              | 0.0462                                              | 0.0343                                                             | 0.0476                                                              | 0.0667                                                |
| Observed reflexes,<br><i>I</i> > 2 $\sigma$ ( <i>I</i> )                             | 8176                                                | 6207                                                               | 4917                                                                | 9052                                                  |
| Data/restraints/<br>parameters                                                       | 9432/0/358                                          | 6656/0/333                                                         | 6082/99/305                                                         | 10161/0/313                                           |
| <i>R</i> <sub>1</sub> / <i>wR</i> <sub>2</sub> [ <i>I</i> > 2 $\sigma$ ( <i>I</i> )] | 0.0272/0.0589                                       | 0.0292/0.0696                                                      | 0.0320/0.0699                                                       | 0.0287/0.0709                                         |
| <i>R</i> <sub>1</sub> / <i>wR</i> <sub>2</sub> (all data)                            | 0.0337/0.0616                                       | 0.0315/0.0723                                                      | 0.0453/0.0751                                                       | 0.0337/0.0739                                         |
| GoF on <i>F</i> <sup>2</sup>                                                         | 1.031                                               | 1.069                                                              | 1.076                                                               | 1.108                                                 |
| $\rho_{\text{max}}/\rho_{\text{min}}$ [e Å <sup>-3</sup> ]                           | 0.85/–1.21                                          | 0.72/–0.72                                                         | 1.26/–0.60                                                          | 1.64/–0.91                                            |
| CCDC number                                                                          | 2350371                                             | 2350372                                                            | 2350373                                                             | 2350374                                               |

[a] **1** shows a disorder of one C<sub>2</sub>F<sub>5</sub> group with the ratio 77:23. The pairs F(8)/F(8B) and F(10)/F(10B) are nearer than the resolution of 0.59 Å, therefore thermal parameters were constrained to be the same. [b] Hydrogen atoms were refined isotropically. [c] Disorder of one C<sub>2</sub>F<sub>5</sub> group over two sides (55:45).

|                                                                                      | FLP·PhNCS <b>5a</b> <sup>[d]</sup>                    | FLP·AuCl <b>6</b> <sup>[e]</sup>                                                   | FLP·AuOTf <b>7</b>                                                                                |
|--------------------------------------------------------------------------------------|-------------------------------------------------------|------------------------------------------------------------------------------------|---------------------------------------------------------------------------------------------------|
| Empirical formula                                                                    | C <sub>20</sub> H <sub>25</sub> F <sub>10</sub> NPSSb | C <sub>26</sub> H <sub>40</sub> AuClF <sub>20</sub> P <sub>2</sub> Sb <sub>2</sub> | C <sub>27</sub> H <sub>40</sub> O <sub>3</sub> F <sub>23</sub> P <sub>2</sub> SSb <sub>2</sub> Au |
| <i>M<sub>r</sub></i>                                                                 | 654.19                                                | 1270.43                                                                            | 1384.08                                                                                           |
| $\lambda$ [Å]                                                                        | 0.71073                                               | 0.71073                                                                            | 0.71073                                                                                           |
| <i>T</i> [K]                                                                         | 100.0(1)                                              | 100.0(1)                                                                           | 100.0(1)                                                                                          |
| <i>F</i> (000) [e]                                                                   | 1296                                                  | 1208                                                                               | 2633.473                                                                                          |
| Crystal system                                                                       | triclinic                                             | triclinic                                                                          | orthorhombic                                                                                      |
| Space group                                                                          | <i>P</i> $\bar{1}$                                    | <i>P</i> $\bar{1}$                                                                 | <i>P</i> 2 <sub>1</sub> 2 <sub>1</sub> 2 <sub>1</sub>                                             |
| <i>a</i> [Å]                                                                         | 9.9191(2)                                             | 8.8715(2)                                                                          | 11.7280(2)                                                                                        |
| <i>b</i> [Å]                                                                         | 16.6017(3)                                            | 10.8958(2)                                                                         | 18.5033(3)                                                                                        |
| <i>c</i> [Å]                                                                         | 17.2503(3)                                            | 21.7596(4)                                                                         | 19.9201(3)                                                                                        |
| $\alpha$ [°]                                                                         | 64.175(2)                                             | 77.654(2)                                                                          | 90                                                                                                |
| $\beta$ [°]                                                                          | 85.392(1)                                             | 85.919(1)                                                                          | 90                                                                                                |
| $\gamma$ [°]                                                                         | 85.358(1)                                             | 80.909(2)                                                                          | 90                                                                                                |
| <i>V</i> [Å <sup>3</sup> ]                                                           | 2545.37(9)                                            | 2027.35(7)                                                                         | 4322.80(12)                                                                                       |
| <i>Z</i>                                                                             | 4                                                     | 2                                                                                  | 4                                                                                                 |
| $\rho_{\text{calcd.}}$ [g cm <sup>-3</sup> ]                                         | 1.707                                                 | 2.081                                                                              | 2.127                                                                                             |
| $\mu$ [mm <sup>-1</sup> ]                                                            | 1.311                                                 | 5.188                                                                              | 4.877                                                                                             |
| 2 $\theta$ range [°]                                                                 | 5.062–65.776                                          | 4.658–70.62                                                                        | 6.52–78.16                                                                                        |
| Index ranges <i>h</i>                                                                | –14 ≤ <i>h</i> ≤ 15                                   | –14 ≤ <i>h</i> ≤ 14                                                                | –20 ≤ <i>h</i> ≤ 20                                                                               |
| Index ranges <i>k</i>                                                                | –25 ≤ <i>k</i> ≤ 25                                   | –17 ≤ <i>k</i> ≤ 17                                                                | –32 ≤ <i>k</i> ≤ 31                                                                               |
| Index ranges <i>l</i>                                                                | –26 ≤ <i>l</i> ≤ 25                                   | –35 ≤ <i>l</i> ≤ 35                                                                | –35 ≤ <i>l</i> ≤ 34                                                                               |
| Reflexes collected                                                                   | 142479                                                | 160871                                                                             | 200413                                                                                            |
| Independent reflexes                                                                 | 17900                                                 | 17433                                                                              | 24648                                                                                             |
| <i>R</i> <sub>int</sub>                                                              | 0.0545                                                | 0.0393                                                                             | 0.0468                                                                                            |
| Observed reflexes,<br><i>I</i> > 2 $\sigma$ ( <i>I</i> )                             | 14475                                                 | 15922                                                                              | 22719                                                                                             |
| Data/restraints/<br>parameters                                                       | 17900/60/656                                          | 17433/0/545                                                                        | 24648/0/652                                                                                       |
| <i>R</i> <sub>1</sub> / <i>wR</i> <sub>2</sub> [ <i>I</i> > 2 $\sigma$ ( <i>I</i> )] | 0.0300/0.0622                                         | 0.0303/0.0595                                                                      | 0.0230/0.0444                                                                                     |
| <i>R</i> <sub>1</sub> / <i>wR</i> <sub>2</sub> (all data)                            | 0.0454/0.0680                                         | 0.0357/0.0614                                                                      | 0.0298/0.0481                                                                                     |
| GoF on <i>F</i> <sup>2</sup>                                                         | 1.035                                                 | 1.086                                                                              | 1.069                                                                                             |
| $\rho_{\text{max}}/\rho_{\text{min}}$ [e Å <sup>-3</sup> ]                           | 0.99/–0.51                                            | 2.70/–2.26                                                                         | 1.57/–1.24                                                                                        |
| Flack parameter                                                                      |                                                       |                                                                                    | –0.0142(8)                                                                                        |
| CCDC number                                                                          | 2350375                                               | 2350376                                                                            | 2350377                                                                                           |

[d] Disorder of one CF<sub>3</sub> group over two sides (52:48). [e] Disorder of one C<sub>2</sub>F<sub>5</sub> group over two sides (56:44).

## Quantum Chemical Calculations

### Adduct formation of **1** with small molecules

The starting geometries were taken from crystallographic data if available or otherwise built in Molden (Version 6.9).<sup>11,12</sup> After optimisation with the xtb suite,<sup>13–17</sup> the composite method r<sup>2</sup>SCAN-3c<sup>18–23</sup> was used for final geometry optimisation and vibrational analysis in Orca 5.0.2.<sup>24–27</sup> Enthalpies and Free Gibbs Energies were obtained at the same level of theory by using rotational entropies computed according to Herzberg<sup>28</sup> and vibrational entropies computed using the quasi-rigid-rotor-harmonic-oscillator (QRRHO) approximation.<sup>29</sup> The data used in the calculation of reaction enthalpies  $\Delta H$  and Gibbs free energies  $\Delta G$  is shown in Table S1. Cartesian coordinates and relevant data of all computed structures can be found below.

**Table S1** The enthalpies and Gibbs free energies of **1**, several small molecules and the corresponding adducts as well as the reaction enthalpy  $\Delta H$  and Gibbs free energy  $\Delta G$  of the adduct formation reaction calculated with the composite method r<sup>2</sup>SCAN-3c.

|                                 | <i>T</i> / K,<br><i>p</i> / atm | Total<br>enthalpy /<br><i>E<sub>h</sub></i> | Final Gibbs free<br>energy / <i>E<sub>h</sub></i> | Molecule                                        | <i>T</i> / K, <i>p</i> /<br><i>atm</i> | Total<br>enthalpy /<br><i>E<sub>h</sub></i> | Final Gibbs free<br>energy / <i>E<sub>h</sub></i> | $\Delta H$ /<br>kJ mol <sup>-1</sup> | $\Delta G$ /<br>kJ mol <sup>-1</sup> |
|---------------------------------|---------------------------------|---------------------------------------------|---------------------------------------------------|-------------------------------------------------|----------------------------------------|---------------------------------------------|---------------------------------------------------|--------------------------------------|--------------------------------------|
| <b>1</b>                        | 298, 1                          | -2087.074280                                | -2087.163830                                      |                                                 |                                        |                                             |                                                   |                                      |                                      |
|                                 | 298, 10                         | -2087.074307                                | -2087.161614                                      |                                                 |                                        |                                             |                                                   |                                      |                                      |
|                                 | 233, 1                          | -2087.085052                                | -2087.146619                                      |                                                 |                                        |                                             |                                                   |                                      |                                      |
|                                 | 233, 10                         | -2087.085052                                | -2087.144920                                      |                                                 |                                        |                                             |                                                   |                                      |                                      |
| CO <sub>2</sub>                 | 298, 1                          | -188.554807                                 | -188.579075                                       | 1·CO <sub>2</sub>                               | 298, 1                                 | -2275.640467                                | -2275.734116                                      | -30                                  | 23                                   |
|                                 | 298, 10                         | -188.554810                                 | -188.576889                                       |                                                 | 298, 10                                | -2275.640496                                | -2275.731899                                      | -30                                  | 17                                   |
|                                 | 233, 1                          | -188.555690                                 | -188.573878                                       |                                                 | 233, 1                                 | -2275.652235                                | -2275.716136                                      | -30                                  | 11                                   |
|                                 | 233, 10                         | -188.555690                                 | -188.572179                                       |                                                 | 233, 10                                | -2275.652235                                | -2275.714437                                      | -30                                  | 7                                    |
| CS <sub>2</sub>                 | 298, 1                          | -834.431097                                 | -834.458100                                       | 1·CS <sub>2</sub>                               | 298, 1                                 | -2921.525635                                | -2921.620495                                      | -53                                  | 4                                    |
|                                 | 233, 1                          | -834.432180                                 | -834.452329                                       |                                                 | 233, 1                                 | -2921.537609                                | -2921.602309                                      | -54                                  | -9                                   |
| P( <i>t</i> Bu) <sub>2</sub> Me | 298, 1                          | -696.526794                                 | -696.579198                                       | P( <i>t</i> Bu) <sub>2</sub> Me·CS <sub>2</sub> | 298, 1                                 | -1530.962801                                | -1531.023659                                      | -13                                  | 36                                   |
| PhNCO                           | 298, 1                          | -399.541382                                 | -399.581271                                       | 1·PhNCO                                         | 298, 1                                 | -2486.646789                                | -2486.749061                                      | -82                                  | -10                                  |
|                                 |                                 |                                             |                                                   | 1·PhNCO                                         |                                        | -2486.644075                                | -2486.747544                                      | -75                                  | -6                                   |
| PhNCS                           | 298, 1                          | -722.486005                                 | -722.526997                                       | 1·PhNCS                                         | 298, 1                                 | -2809.592235                                | -2809.695109                                      | -84                                  | -11                                  |
|                                 |                                 |                                             |                                                   | 1·PhNCS                                         |                                        | -2809.592447                                | -2809.696820                                      | -84                                  | -16                                  |

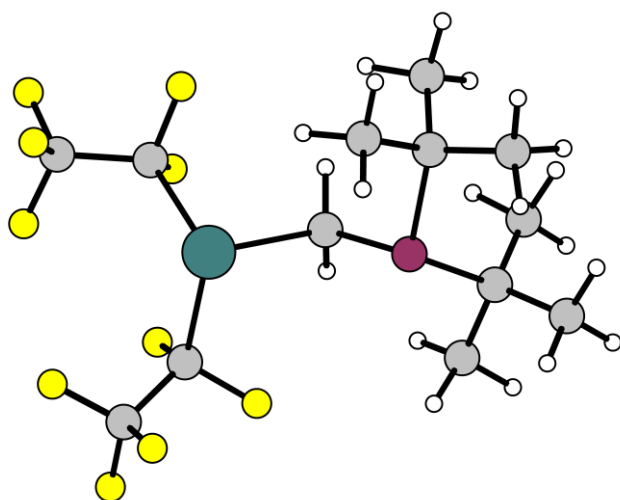

**Figure S56** Molecular structure of **1** obtained from geometry optimisation at r<sup>2</sup>SCAN-3c-D4/def2-TZVPP level of theory.

Coordinates from ORCA-job jonas\_flip\_frei\_r2scan-3c\_def2-tzvpp\_d4

|    |                   |                   |                   |
|----|-------------------|-------------------|-------------------|
| Sb | -0.63450975229723 | -0.30444015114203 | -0.58813637929149 |
| P  | 2.61661783614345  | 0.30703008185624  | -0.44761918955897 |
| F  | -2.07919154586250 | 1.59099344296584  | 1.35374410987942  |
| F  | -0.47835089800951 | 2.57865170218435  | 0.21171341853303  |
| F  | -1.96366597635449 | 2.44029525077127  | -2.05670247530470 |
| F  | -3.03941151592227 | 3.41356989876977  | -0.42818093013291 |
| F  | -3.55138040316357 | 1.37372665526154  | -1.00627742445890 |
| F  | -1.41289210013971 | -1.03412540272230 | 2.29056376740186  |
| F  | -0.79694854652710 | -2.73127727181833 | 1.03013489148609  |
| F  | -3.16281462157581 | -2.56181656011326 | -0.35098113289289 |
| F  | -3.79417197587214 | -0.88452547694996 | 0.89451955858841  |
| F  | -3.42963282732555 | -2.83507592456888 | 1.79619740215948  |
| C  | -1.49924577350852 | 1.66908376032307  | 0.12676034785423  |
| C  | -2.53757441379075 | 2.24602427912466  | -0.85429400427387 |
| C  | -1.54135825044603 | -1.57253526646351 | 1.04936581393247  |
| C  | -3.01273964047046 | -1.97625604788743 | 0.85352027446644  |
| C  | 1.14579998268873  | -0.04141952116050 | 0.64831471015005  |
| H  | 0.93122045077939  | 0.82628899295537  | 1.27477409815112  |
| H  | 1.24871197185710  | -0.91165913169714 | 1.30236362921036  |
| C  | 3.33302966083003  | -1.45763970251736 | -0.66205412718402 |
| C  | 2.46196545139531  | -2.11524418534212 | -1.74874717918136 |
| H  | 2.87465520715980  | -3.10167244965072 | -1.99713626959404 |
| H  | 1.43332793006703  | -2.28138143531198 | -1.40643070488756 |
| H  | 2.42703732101249  | -1.51503099600530 | -2.66365796470691 |
| C  | 3.32513958891446  | -2.36842399344622 | 0.57073129252409  |
| H  | 2.31074711044083  | -2.61213398710327 | 0.90033114694419  |
| H  | 3.80651292909701  | -3.32072870439285 | 0.31075770694519  |
| H  | 3.87019352551444  | -1.94488904219978 | 1.41652893600507  |
| C  | 4.76479377824031  | -1.35144113803473 | -1.20481352720795 |
| H  | 5.47406151922792  | -1.05512675103120 | -0.42686617633345 |
| H  | 5.08253224741855  | -2.33300542989722 | -1.57892506053048 |
| H  | 4.83621628136617  | -0.63775171613451 | -2.03344498364809 |
| C  | 3.72458544158776  | 1.35966747084186  | 0.70440207285016  |
| C  | 2.88892371148732  | 2.60107911172672  | 1.07044598065580  |
| H  | 2.10428805837813  | 2.38273776596993  | 1.80017621205084  |
| H  | 3.54904631324650  | 3.35106208795114  | 1.52338565511751  |
| H  | 2.42219467101561  | 3.05297685386084  | 0.18786573923714  |
| C  | 4.20433440952931  | 0.67901224017969  | 1.98724176198077  |
| H  | 4.92566461195644  | -0.11662429187137 | 1.78030552024899  |
| H  | 4.70580679207325  | 1.41511396324175  | 2.63030962550132  |
| H  | 3.37166432827279  | 0.25368577385836  | 2.55854189729136  |
| C  | 4.92677672805541  | 1.85488384676036  | -0.11713140718579 |
| H  | 5.61404917638187  | 1.05172715311896  | -0.38887414154543 |
| H  | 4.59894127192719  | 2.34966144225845  | -1.03771769283032 |
| H  | 5.49220493520086  | 2.58492180348182  | 0.47627220158369  |

Point Group: C<sub>1</sub>, Symmetry Number: 1

Total Enthalpy ... -2087.07428012 E<sub>h</sub>

Final Gibbs free energy ... -2087.16382953 E<sub>h</sub>

|     |                          |
|-----|--------------------------|
| 0:  | 0.00 cm** <sup>-1</sup>  |
| 1:  | 0.00 cm** <sup>-1</sup>  |
| 2:  | 0.00 cm** <sup>-1</sup>  |
| 3:  | 0.00 cm** <sup>-1</sup>  |
| 4:  | 0.00 cm** <sup>-1</sup>  |
| 5:  | 0.00 cm** <sup>-1</sup>  |
| 6:  | 6.21 cm** <sup>-1</sup>  |
| 7:  | 13.58 cm** <sup>-1</sup> |
| 8:  | 19.06 cm** <sup>-1</sup> |
| 9:  | 32.44 cm** <sup>-1</sup> |
| 10: | 38.38 cm** <sup>-1</sup> |
| 11: | 45.41 cm** <sup>-1</sup> |
| 12: | 48.67 cm** <sup>-1</sup> |

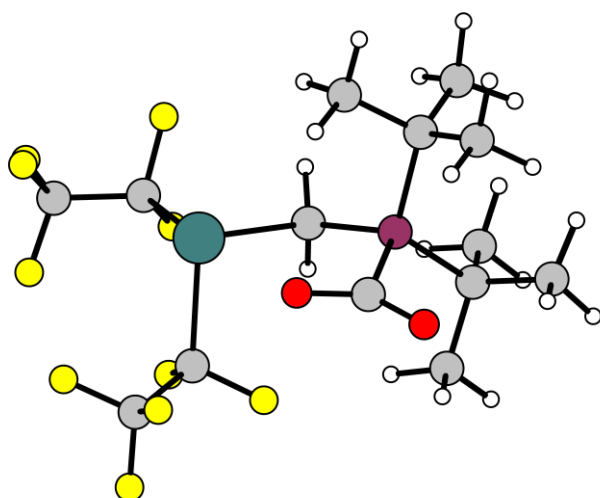

**Figure S57** Molecular structure of **1**·CO<sub>2</sub> obtained from geometry optimisation at r<sup>2</sup>SCAN-3c-D4/def2-TZVPP level of theory.

48

Coordinates from ORCA-job jonas\_flp\_co2\_r2scan-3c\_def2-tzvpp\_d4

|    |                   |                   |                   |
|----|-------------------|-------------------|-------------------|
| C  | 0.82545203092845  | -0.74813339129905 | 0.61734026011100  |
| P  | 2.44223004427045  | -0.13464420791459 | 0.09885683628641  |
| C  | 2.13978913179861  | 1.39894378232828  | -1.06888561405103 |
| O  | 3.09486363324929  | 2.14947161457634  | -1.19095095943404 |
| C  | 3.25038225073734  | -1.44558293976964 | -0.98337508096530 |
| C  | 4.39389177430220  | -0.82145021821840 | -1.79922201424185 |
| C  | 3.40281219572330  | 0.39194335161055  | 1.62473885895956  |
| C  | 4.86374114122421  | 0.69842138852472  | 1.26839619400553  |
| Sb | -0.80132484809591 | -0.22477710770175 | -0.79749447660333 |
| C  | -1.99928281616838 | -1.68691302724342 | 0.53382785572620  |
| C  | -3.50820465190747 | -1.78482352379012 | 0.27028676875261  |
| F  | -4.08152016239117 | -2.81731528631593 | 0.91389643573097  |
| C  | -1.35775009565160 | 1.58540290002985  | 0.45718939039808  |
| C  | -2.25336731696673 | 2.57657373082913  | -0.31049165164787 |
| F  | -3.37217424542120 | 1.93782595927856  | -0.71234734847986 |
| F  | -2.02387249673847 | 1.22529842192701  | 1.59161967580234  |
| F  | -0.23611265808049 | 2.25785103510417  | 0.85345458919610  |
| F  | -1.61527811038601 | 3.03557372340352  | -1.39543781705174 |
| F  | -2.61254465362600 | 3.62134663960182  | 0.45155802272038  |
| F  | -1.81962640482141 | -1.57464788512361 | 1.88486025962389  |
| F  | -1.46172026378835 | -2.91704894590377 | 0.17076970774460  |
| F  | -3.72049504913845 | -1.94708826921656 | -1.05358307375011 |
| F  | -4.12173825451890 | -0.65464355251761 | 0.65881938900546  |
| C  | 2.17715989572646  | -1.94937697683287 | -1.96528526175669 |
| C  | 3.77060195143728  | -2.62247532768651 | -0.14853720080697 |
| C  | 2.72748214975753  | 1.67974172128837  | 2.13168257741100  |
| C  | 3.33209950087403  | -0.68210527889746 | 2.72029730048200  |
| O  | 0.99437653869111  | 1.36597005246712  | -1.57875854483421 |
| H  | 0.54742030376722  | -0.29358317433041 | 1.57255061668672  |
| H  | 0.81408213823029  | -1.83455123400918 | 0.74376052560939  |
| H  | 2.66027455115819  | -2.63726619407744 | -2.66898565973171 |
| H  | 1.37586696621785  | -2.50386246237130 | -1.46662646505218 |
| H  | 1.73916694151959  | -1.13268621946369 | -2.54853183168740 |
| H  | 2.99391768409813  | -3.05790323270045 | 0.48927939258762  |
| H  | 4.11439399002825  | -3.40847008995981 | -0.83177207168737 |
| H  | 4.62063672241856  | -2.33727807932745 | 0.47688296586527  |
| H  | 5.19475922873939  | -0.42343223406045 | -1.17366581377674 |
| H  | 4.82221773484487  | -1.60550779383631 | -2.43488355016473 |
| H  | 4.03868496966632  | -0.01345895485170 | -2.44392625198565 |
| H  | 1.68386518294045  | 1.52142923881539  | 2.41820486008949  |
| H  | 3.26657493332524  | 2.01246231050962  | 3.02639214507779  |
| H  | 2.77148490283394  | 2.47910452406976  | 1.38741500292296  |
| H  | 3.81739000766186  | -1.61607909322898 | 2.42782473966354  |

|   |                  |                   |                  |
|---|------------------|-------------------|------------------|
| H | 3.85428863912098 | -0.30102410954873 | 3.60611656265252 |
| H | 2.30270962396279 | -0.90471038123577 | 3.01667653233136 |
| H | 5.42219984016613 | -0.20636997740031 | 1.01173893099668 |
| H | 4.93306881390707 | 1.41553668572774  | 0.44571783078753 |
| H | 5.34423561437312 | 1.13879208874132  | 2.15017346048179 |

Point Group:  $C_1$ , Symmetry Number: 1

Total Enthalpy ... -2275.64046693  $E_h$

Final Gibbs free energy ... -2275.73411595  $E_h$

|     |                         |
|-----|-------------------------|
| 0:  | 0.00 $\text{cm}^{*-1}$  |
| 1:  | 0.00 $\text{cm}^{*-1}$  |
| 2:  | 0.00 $\text{cm}^{*-1}$  |
| 3:  | 0.00 $\text{cm}^{*-1}$  |
| 4:  | 0.00 $\text{cm}^{*-1}$  |
| 5:  | 0.00 $\text{cm}^{*-1}$  |
| 6:  | 15.68 $\text{cm}^{*-1}$ |
| 7:  | 18.03 $\text{cm}^{*-1}$ |
| 8:  | 36.54 $\text{cm}^{*-1}$ |
| 9:  | 41.94 $\text{cm}^{*-1}$ |
| 10: | 46.41 $\text{cm}^{*-1}$ |
| 11: | 48.58 $\text{cm}^{*-1}$ |
| 12: | 60.73 $\text{cm}^{*-1}$ |

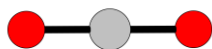

**Figure S58** Molecular structure of  $\text{CO}_2$  obtained from geometry optimisation at  $r^2\text{SCAN-3c-D4/def2-TZVPP}$  level of theory.

3

Coordinates from ORCA-job jonas\_co2\_r2scan-3c\_def2-tzvpp\_d4

|   |                   |                   |                   |
|---|-------------------|-------------------|-------------------|
| C | -0.00000000503786 | 0.00000000476514  | -0.00000000000972 |
| O | 0.00000000251893  | -0.00000000238257 | 1.16342532989592  |
| O | 0.00000000251893  | -0.00000000238257 | -1.16342532988620 |

Point Group:  $D_{\infty h}$ , Symmetry Number: 2

Total Enthalpy ... -188.55480747  $E_h$

Final Gibbs free energy ... -188.57907466  $E_h$

|    |                           |
|----|---------------------------|
| 0: | 0.00 $\text{cm}^{*-1}$    |
| 1: | 0.00 $\text{cm}^{*-1}$    |
| 2: | 0.00 $\text{cm}^{*-1}$    |
| 3: | 0.00 $\text{cm}^{*-1}$    |
| 4: | 0.00 $\text{cm}^{*-1}$    |
| 5: | 666.21 $\text{cm}^{*-1}$  |
| 6: | 666.21 $\text{cm}^{*-1}$  |
| 7: | 1366.45 $\text{cm}^{*-1}$ |
| 8: | 2431.59 $\text{cm}^{*-1}$ |

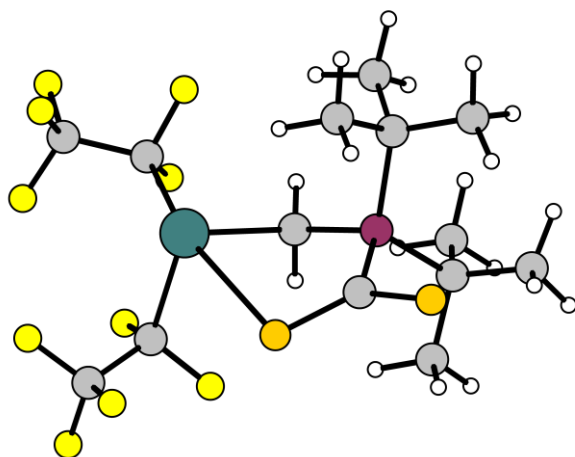

**Figure S59** Molecular structure of **2** obtained from geometry optimisation at  $r^2$ SCAN-3c-D4/def2-TZVPP level of theory.

48

Coordinates from ORCA-job jonas\_flp\_cs2\_r2scan-3c\_def2-tzvpp\_d4

|    |                   |                   |                   |
|----|-------------------|-------------------|-------------------|
| Sb | 0.92391209238229  | 0.03347801525926  | -0.67136665070325 |
| S  | -1.02022424868780 | -2.06390989381207 | -1.20733047917442 |
| S  | -3.98294513321531 | -1.59281321667229 | -1.53366056112591 |
| P  | -2.39300576933723 | 0.23314587488347  | 0.19662271134025  |
| F  | 2.64793595388416  | -0.91317036009009 | 1.67842363011768  |
| F  | 0.90956635563863  | -2.21689263545705 | 1.39552234919634  |
| F  | 2.02674145843574  | -3.16593475377269 | -0.94943486660703 |
| F  | 3.32056442954938  | -3.40124684694665 | 0.78845574013138  |
| F  | 3.73187435390820  | -1.83370247579163 | -0.67258765273291 |
| F  | 1.98003332312375  | 1.79305757908134  | 1.77232878253911  |
| F  | 1.26347885103463  | 2.90129320175697  | 0.00629672696262  |
| F  | 3.49192165022857  | 2.17788014665606  | -1.38385907509623 |
| F  | 4.25661268399097  | 1.06619743024708  | 0.33052986346555  |
| F  | 3.94276620021643  | 3.21708968271033  | 0.48055526540562  |
| C  | 1.86709898689348  | -1.50247087090844 | 0.73181181006067  |
| C  | 2.75449602344912  | -2.50441377250527 | -0.03202470149969 |
| C  | 2.00928143489598  | 1.79571595637252  | 0.40528173757828  |
| C  | 3.45123402328006  | 2.07683855418313  | -0.03773722595764 |
| C  | -0.69167065449335 | 0.46612553427654  | 0.77164635824203  |
| H  | -0.50807131831577 | -0.24893811260086 | 1.57828473198771  |
| H  | -0.55675442806399 | 1.47281247658260  | 1.17159563127503  |
| C  | -2.87727219263181 | 1.78957745454130  | -0.76805757642231 |
| C  | -2.25780633237500 | 1.64563680194643  | -2.16964006193296 |
| H  | -2.43701687045557 | 2.57917803144613  | -2.71545609831916 |
| H  | -1.17271646869056 | 1.49486921552400  | -2.13413683123226 |
| H  | -2.70808275830429 | 0.82359183878934  | -2.73121066715733 |
| C  | -2.29333446618492 | 3.03879736199095  | -0.08843333598616 |
| H  | -1.20236466836893 | 3.06820273038705  | -0.12807043262767 |
| H  | -2.66267388754434 | 3.91449069582311  | -0.63476296557524 |
| H  | -2.61493047172014 | 3.14555301693730  | 0.95187705602862  |
| C  | -4.39731921809812 | 1.95531711929294  | -0.90188777354686 |
| H  | -4.85162463240018 | 2.28573352162452  | 0.03532614651602  |
| H  | -4.58128458361923 | 2.73675087881186  | -1.64867847414526 |
| H  | -4.88693241802798 | 1.03837657420337  | -1.23825065853690 |
| C  | -3.38036165251107 | -0.18719353916536 | 1.76089478756997  |
| C  | -2.96339836650880 | -1.61719695690469 | 2.15286117064693  |
| H  | -1.88151079456112 | -1.74043528732196 | 2.26201190270250  |
| H  | -3.42076227637091 | -1.84456567212299 | 3.12254935805845  |
| H  | -3.32057856802916 | -2.35019946014240 | 1.42502539687562  |
| C  | -2.99209894210157 | 0.79623539681140  | 2.87716709909510  |
| H  | -3.25987453111037 | 1.82753281216269  | 2.62876704106151  |
| H  | -3.55458352710338 | 0.52156707889291  | 3.77713997189391  |
| H  | -1.92912752779115 | 0.75960600496013  | 3.12882522012762  |

|   |                   |                   |                   |
|---|-------------------|-------------------|-------------------|
| C | -4.90223294549104 | -0.15017464175375 | 1.57192862563044  |
| H | -5.27932154177034 | 0.86982895009613  | 1.48338858992560  |
| H | -5.22296333678865 | -0.72601434387228 | 0.70131498999486  |
| H | -5.35598654197080 | -0.59257046290966 | 2.46680743142885  |
| C | -2.46651474826847 | -1.23330563350074 | -0.93209203747910 |

Point Group:  $C_1$ , Symmetry Number: 1

Total Enthalpy ... -2921.52563463  $E_h$

Final Gibbs free energy ... -2921.62049473  $E_h$

|     |                          |
|-----|--------------------------|
| 0:  | 0.00 cm** <sup>-1</sup>  |
| 1:  | 0.00 cm** <sup>-1</sup>  |
| 2:  | 0.00 cm** <sup>-1</sup>  |
| 3:  | 0.00 cm** <sup>-1</sup>  |
| 4:  | 0.00 cm** <sup>-1</sup>  |
| 5:  | 0.00 cm** <sup>-1</sup>  |
| 6:  | 22.50 cm** <sup>-1</sup> |
| 7:  | 23.22 cm** <sup>-1</sup> |
| 8:  | 34.03 cm** <sup>-1</sup> |
| 9:  | 39.39 cm** <sup>-1</sup> |
| 10: | 41.74 cm** <sup>-1</sup> |
| 11: | 50.47 cm** <sup>-1</sup> |
| 12: | 55.71 cm** <sup>-1</sup> |

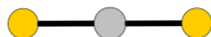

**Figure S60** Molecular structure of  $CS_2$  obtained from geometry optimisation at  $r^2SCAN$ -3c-D4/def2-TZVPP level of theory.

3

Coordinates from ORCA-job jonas\_cs2\_r2scan-3c\_def2-tzvpp\_d4

|   |                   |                   |                   |
|---|-------------------|-------------------|-------------------|
| C | 0.00000000297790  | -0.00000000281344 | -0.00000000011395 |
| S | -0.00000000148895 | 0.00000000140672  | 1.56062319819370  |
| S | -0.00000000148895 | 0.00000000140672  | -1.56062319807975 |

Point Group:  $D_{\infty h}$ , Symmetry Number: 2

Total Enthalpy ... -834.43109677  $E_h$

Final Gibbs free energy ... -834.45809978  $E_h$

|    |                            |
|----|----------------------------|
| 0: | 0.00 cm** <sup>-1</sup>    |
| 1: | 0.00 cm** <sup>-1</sup>    |
| 2: | 0.00 cm** <sup>-1</sup>    |
| 3: | 0.00 cm** <sup>-1</sup>    |
| 4: | 0.00 cm** <sup>-1</sup>    |
| 5: | 397.24 cm** <sup>-1</sup>  |
| 6: | 397.24 cm** <sup>-1</sup>  |
| 7: | 675.79 cm** <sup>-1</sup>  |
| 8: | 1576.24 cm** <sup>-1</sup> |



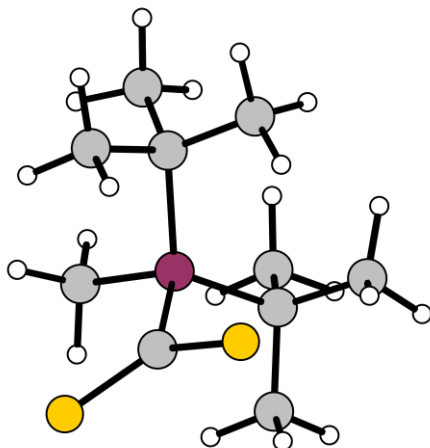

**Figure S61** Molecular structure of  $P(tBu)_2Me-CS_2$  obtained from geometry optimisation at  $r^2SCAN-3c-D4/def2-TZVPP$  level of theory.

34

Coordinates from ORCA-job jonas\_ptbu2me\_cs2\_r2scan-3c\_def2-tzvpp\_d4

|   |                   |                   |                   |
|---|-------------------|-------------------|-------------------|
| P | 0.92528607322546  | 0.02276930217023  | -0.68290660094742 |
| C | -0.35698468323668 | -1.23294997974744 | -1.02248661843006 |
| C | -0.01088474305336 | 1.66687856258884  | -0.63226462449340 |
| C | -1.08112400908538 | 1.70470527858236  | -1.73535144990469 |
| C | 2.22321819301164  | -0.22847708014961 | -2.03755525295280 |
| C | 1.54002742582082  | -0.48198077650249 | -3.39073249016411 |
| C | 3.19412788179353  | 0.95083235142378  | -2.17856543830263 |
| C | 3.01550478136974  | -1.48370806110241 | -1.62530730328805 |
| C | 0.90278861783962  | 2.89074467295723  | -0.77854306966376 |
| H | 0.10142574131844  | -2.22366647184310 | -0.99183437663815 |
| H | -0.83507508841851 | -1.06407295907660 | -1.99009673162484 |
| H | 0.32064101294401  | 3.77883357149488  | -0.50440510469572 |
| H | -0.65488446881483 | 1.59629887335103  | -2.73735270809643 |
| H | -1.57122801097497 | 2.68469036160028  | -1.69385832060740 |
| H | -1.85553792836749 | 0.94562464982145  | -1.59649390254232 |
| H | 1.23969879057922  | 3.02461703835672  | -1.80931333271589 |
| H | 1.77202613741927  | 2.82798518600573  | -0.11944924477552 |
| H | 0.91682902298383  | 0.35890574314254  | -3.71009762531326 |
| H | 2.32572143693289  | -0.60859118767560 | -4.14522660282318 |
| H | 0.93550944127617  | -1.39280723343517 | -3.39328504577930 |
| H | 4.02128369441263  | 0.62717935946226  | -2.82183793934875 |
| H | 2.72307526324473  | 1.81228711598191  | -2.65711296309945 |
| H | 3.60333554592891  | 1.25591290677268  | -1.21243430885646 |
| H | 3.71780033798037  | -1.72056230359982 | -2.43332367013806 |
| H | 3.58642056818398  | -1.31226556570404 | -0.70929602017689 |
| H | 2.37405717152124  | -2.35759704643447 | -1.47417694372158 |
| H | 0.03051913017867  | 1.79365375462174  | 1.55299131413837  |
| H | -1.32697709347467 | 0.83579496077845  | 0.93261739061152  |
| H | -1.34724335104503 | 2.59784865337147  | 0.76914499523900  |
| C | -0.70007601344982 | 1.71312004086038  | 0.74437936278974  |
| C | 1.68110444857962  | -0.31900869368086 | 0.97544483434223  |
| S | 1.09691681017636  | -1.64779989152423 | 1.80341960269710  |
| S | 2.86937247990720  | 0.80485787977324  | 1.38255617010957  |
| H | -1.10087061670762 | -1.19960401264136 | -0.22337198082740 |

Point Group:  $C_1$ , Symmetry Number: 1

Total Enthalpy ... -1530.96280080  $E_h$

Final Gibbs free energy ... -1531.02365908  $E_h$

0: 0.00  $cm^{-1}$   
 1: 0.00  $cm^{-1}$   
 2: 0.00  $cm^{-1}$   
 3: 0.00  $cm^{-1}$

- 4: 0.00 cm<sup>-1</sup>
- 5: 0.00 cm<sup>-1</sup>
- 6: 30.36 cm<sup>-1</sup>
- 7: 51.03 cm<sup>-1</sup>
- 8: 83.73 cm<sup>-1</sup>
- 9: 137.62 cm<sup>-1</sup>
- 10: 138.53 cm<sup>-1</sup>
- 11: 171.92 cm<sup>-1</sup>
- 12: 206.68 cm<sup>-1</sup>

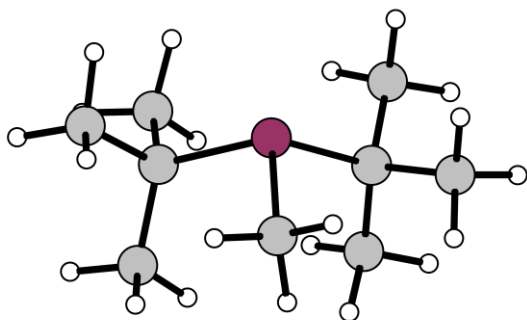

**Figure S62** Molecular structure of **P(tBu)<sub>2</sub>Me** obtained from geometry optimisation at r<sup>2</sup>SCAN-3c-D4/def2-TZVPP level of theory.

31

Coordinates from ORCA-job jonas\_ptbu2me\_r2scan-3c\_def2-tzvpp\_d4

|   |                   |                   |                   |
|---|-------------------|-------------------|-------------------|
| P | 1.10712685596457  | 0.10791165702935  | -0.47066032432185 |
| C | -0.10754470357730 | -1.29307000278056 | -0.66632549578192 |
| C | -0.05628040392452 | 1.60303769505350  | -0.73130973307175 |
| C | -1.16153802146491 | 1.42666163578463  | -1.77827387939226 |
| C | 2.20984826993433  | -0.14756809853708 | -2.01006581744489 |
| C | 1.55156719345389  | 0.05435888272996  | -3.37697754132095 |
| C | 3.42858900271926  | 0.78042251401293  | -1.87942360870748 |
| C | 2.71436204475705  | -1.59913003518785 | -1.91469343255374 |
| C | 0.77075619060072  | 2.85316065213391  | -1.05639951522070 |
| H | 0.36919272980755  | -2.23051247393073 | -0.36799360654849 |
| H | -0.50043455280128 | -1.40419258343223 | -1.68329253341674 |
| H | 0.13680368892325  | 3.74509216166872  | -0.96623343648391 |
| H | -0.76465028427859 | 1.26121618834952  | -2.78205930429890 |
| H | -1.77906013348733 | 2.33486072563954  | -1.81181934690572 |
| H | -1.82549509993722 | 0.59262866637836  | -1.53208958959099 |
| H | 1.16230423658242  | 2.83345364501623  | -2.07767491135299 |
| H | 1.61296638772353  | 2.97010720541458  | -0.36467436138970 |
| H | 1.28491169970989  | 1.10020599279675  | -3.55376091631295 |
| H | 2.25382901029681  | -0.24098144525113 | -4.16898216489451 |
| H | 0.65127727607731  | -0.55774269585639 | -3.49424061225932 |
| H | 4.14388603429664  | 0.56229468598885  | -2.68346983894516 |
| H | 3.15795863579733  | 1.83655385949082  | -1.95544320759365 |
| H | 3.93646002313198  | 0.63015744609893  | -0.92079178951260 |
| H | 3.52747795963425  | -1.74732986679032 | -2.63688037409655 |
| H | 3.10760330065649  | -1.82653103873504 | -0.91649371700225 |
| H | 1.92763452197363  | -2.32269269798427 | -2.14926818409440 |
| H | 0.03250628428405  | 2.01946008137622  | 1.41802680535797  |
| H | -1.29982764141757 | 0.94535864473663  | 0.96206235588304  |
| H | -1.40191133915106 | 2.67158947914234  | 0.59400584791047  |
| C | -0.71536756820771 | 1.81608135208811  | 0.64495566136441  |
| H | -0.95022759807749 | -1.13080223244430 | 0.01265657199851  |

Point Group:  $C_1$ , Symmetry Number: 1  
 Total Enthalpy ... -696.52679411  $E_h$   
 Final Gibbs free energy ... -696.57919757  $E_h$

|     |                          |
|-----|--------------------------|
| 0:  | 0.00 $\text{cm}^{*-1}$   |
| 1:  | 0.00 $\text{cm}^{*-1}$   |
| 2:  | 0.00 $\text{cm}^{*-1}$   |
| 3:  | 0.00 $\text{cm}^{*-1}$   |
| 4:  | 0.00 $\text{cm}^{*-1}$   |
| 5:  | 0.00 $\text{cm}^{*-1}$   |
| 6:  | 88.76 $\text{cm}^{*-1}$  |
| 7:  | 91.64 $\text{cm}^{*-1}$  |
| 8:  | 170.00 $\text{cm}^{*-1}$ |
| 9:  | 210.96 $\text{cm}^{*-1}$ |
| 10: | 217.49 $\text{cm}^{*-1}$ |
| 11: | 225.23 $\text{cm}^{*-1}$ |
| 12: | 235.59 $\text{cm}^{*-1}$ |

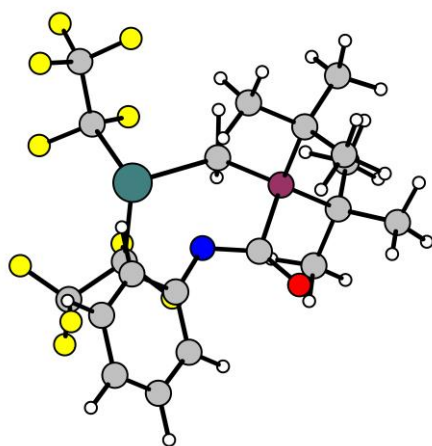

**Figure S63** Molecular structure of the energetically favoured regioisomer of **4** (with  $N\cdots\text{Sb}$  and  $C\cdots\text{P}$ ) obtained from geometry optimisation at  $r^2\text{SCAN-3c-D4/def2-TZVPP}$  level of theory.

59

Coordinates from ORCA-job jonas\_flp\_phnco\_nc\_r2scan-3c\_def2-tzvpp\_d4

|    |                   |                   |                   |
|----|-------------------|-------------------|-------------------|
| P  | 1.11719134491536  | 0.81806227368918  | -0.19542269124041 |
| C  | -0.56760802488050 | 1.41001459428031  | -0.42854686139997 |
| Sb | -2.10509551680121 | 0.09662000344456  | 0.47054346436297  |
| H  | -0.80485675325239 | 1.43921088506361  | -1.49552207367349 |
| H  | -0.70854269966436 | 2.41940840293874  | -0.03259207731336 |
| C  | -3.58653422428964 | 1.78479833863400  | -0.24315328851042 |
| C  | -3.87664921600509 | 2.74318407961115  | 0.92234698221932  |
| F  | -4.79553184818601 | 1.28054083612739  | -0.64508016745813 |
| F  | -3.11380212807475 | 2.57269771125933  | -1.27193503312302 |
| F  | -2.69948162730832 | 3.24285971950057  | 1.39398029479530  |
| F  | -4.47006577490425 | 2.08281765121019  | 1.93373977798500  |
| F  | -4.65294239430431 | 3.78528082964257  | 0.58763101286271  |
| C  | -2.44231070622068 | -0.92934948134235 | -1.53423496270473 |
| C  | -3.47131550335206 | -2.07511489831163 | -1.47015399620871 |
| F  | -2.87748823387313 | -0.03405463072751 | -2.46979786046212 |
| F  | -1.27518128201727 | -1.45644114203493 | -2.01193672676323 |
| F  | -4.64663588618114 | -1.60516891447560 | -1.01457118526609 |
| F  | -3.67377963062747 | -2.62952013178548 | -2.67682690014777 |
| F  | -3.04141212917340 | -3.02900086327813 | -0.62914276443422 |
| C  | 1.80546964356656  | 1.57067222270910  | 1.38424130660881  |
| C  | 0.70038396520460  | 1.47854692802235  | 2.45154868164410  |
| H  | 4.08119409877710  | 0.96927641919583  | -2.54033732440739 |
| C  | 3.01716598269218  | 0.75709909220706  | 1.86591288530917  |
| C  | 2.19359669621197  | 3.04081067861828  | 1.18013361787546  |
| H  | 1.12154467343521  | 1.82410599675104  | 3.40283558122640  |

|   |                   |                   |                   |
|---|-------------------|-------------------|-------------------|
| H | -0.15906854254765 | 2.11678086928412  | 2.22435619169161  |
| H | 0.35567380260920  | 0.44915251926498  | 2.59176834036997  |
| H | 2.45926705581871  | 3.46646734367045  | 2.15510781637372  |
| H | 3.06354500267366  | 3.14928739040627  | 0.52707950646323  |
| H | 1.36985241169711  | 3.63804183278454  | 0.77463975591210  |
| H | 3.37980184095419  | 1.20832376141652  | 2.79716851136425  |
| H | 3.83969704987879  | 0.75940016022937  | 1.14858321209703  |
| H | 2.75180204128936  | -0.28345847488616 | 2.06898880516758  |
| C | 2.08906039635952  | 1.14948338956838  | -1.76704056233934 |
| C | 1.85762753697271  | 2.58978569898632  | -2.24995753314274 |
| C | 1.54296028443563  | 0.16831971204492  | -2.82120046021275 |
| C | 3.58811804549716  | 0.89041809809879  | -1.56392865192888 |
| H | 2.23782221354758  | 3.33651454594412  | -1.54926780441690 |
| H | 4.04775154571179  | 1.63430825715701  | -0.90656281230033 |
| H | 3.76889923591373  | -0.11145021866581 | -1.16624808943480 |
| H | 2.39486525542356  | 2.72062712361763  | -3.19672910966183 |
| H | 0.80097100529223  | 2.79951921995399  | -2.44107697357646 |
| H | 2.06340977540764  | 0.36536027886752  | -3.76570327356678 |
| H | 0.47212896669118  | 0.29928597474243  | -3.00431961879647 |
| H | 1.72683864317678  | -0.87051965303822 | -2.53648625717336 |
| C | 1.09212114455880  | -1.05245877860904 | 0.09310187376664  |
| N | -0.07412243470682 | -1.40113098025810 | 0.60834707637938  |
| O | 2.14042834000357  | -1.66296396301727 | -0.13816319774789 |
| C | -0.32825480747506 | -2.74558221510668 | 0.96227612346787  |
| C | 0.08921104068174  | -3.82752221766506 | 0.17739219850827  |
| C | -0.26204454745958 | -5.12147020601396 | 0.53943956636665  |
| C | -1.02414742867677 | -5.36060927507923 | 1.68057971492335  |
| C | -1.43482535366332 | -4.28756032051233 | 2.46527699704489  |
| C | -1.09072203327844 | -2.98872366052539 | 2.11084641791025  |
| H | 0.68039258369707  | -3.64618780288977 | -0.71248586433154 |
| H | 0.06231192458752  | -5.95326461697763 | -0.07974651972887 |
| H | -1.29542833696699 | -6.37543450679133 | 1.95532342798896  |
| H | -2.02597784956189 | -4.46021071929030 | 3.36018214056930  |
| H | -1.40727873422972 | -2.14988506766073 | 2.72479926021770  |

Point Group:  $C_1$ , Symmetry Number: 1

Total Enthalpy ... -2486.64678858  $E_h$

Final Gibbs free energy ... -2486.74906063  $E_h$

|     |                          |
|-----|--------------------------|
| 0:  | 0.00 cm** <sup>-1</sup>  |
| 1:  | 0.00 cm** <sup>-1</sup>  |
| 2:  | 0.00 cm** <sup>-1</sup>  |
| 3:  | 0.00 cm** <sup>-1</sup>  |
| 4:  | 0.00 cm** <sup>-1</sup>  |
| 5:  | 0.00 cm** <sup>-1</sup>  |
| 6:  | 21.32 cm** <sup>-1</sup> |
| 7:  | 30.11 cm** <sup>-1</sup> |
| 8:  | 32.95 cm** <sup>-1</sup> |
| 9:  | 36.22 cm** <sup>-1</sup> |
| 10: | 41.24 cm** <sup>-1</sup> |
| 11: | 47.24 cm** <sup>-1</sup> |
| 12: | 49.67 cm** <sup>-1</sup> |

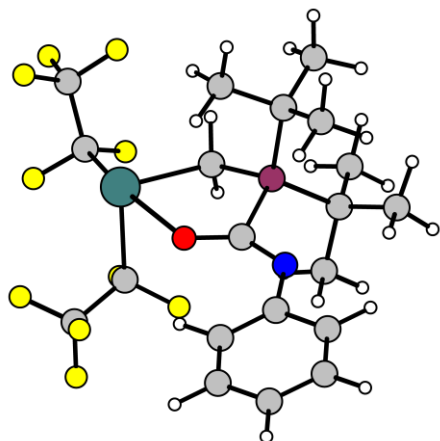

**Figure S64** Molecular structure of the energetically favoured regioisomer of **4** (with O...Sb and C...P) obtained from geometry optimisation at r<sup>2</sup>SCAN-3c-D4/def2-TZVPP level of theory.

59

Coordinates from ORCA-job jonas\_flp\_phnco\_oc\_r2scan-3c\_def2-tzvpp\_d4

|    |                   |                   |                   |
|----|-------------------|-------------------|-------------------|
| Sb | -2.46023653557181 | 1.08136127620692  | -0.87056427455309 |
| C  | -1.76891237474293 | -0.59895893315338 | 0.40058285632266  |
| P  | -0.01918653638778 | -0.99128219264557 | 0.20271658205603  |
| C  | -2.14461808710259 | 2.55052622948772  | 0.83468521816948  |
| C  | -2.21050291565876 | 4.01350236166104  | 0.35850012150666  |
| C  | -4.56856518085492 | 0.61844196155234  | 0.00832526318521  |
| C  | -5.34344745415569 | -0.32662849382992 | -0.92411391985528 |
| F  | -0.92397717413487 | 2.35779599903641  | 1.41758400077938  |
| F  | -3.07716380316915 | 2.39534654842255  | 1.81838833602011  |
| F  | -2.04338714275148 | 4.88282675081406  | 1.36661729024426  |
| F  | -1.25851400809152 | 4.24063900157559  | -0.56286847295537 |
| F  | -3.41141221110761 | 4.24207232864934  | -0.20793565306018 |
| F  | -4.56225769168849 | 0.01457071733240  | 1.24548508041750  |
| F  | -5.31502899886856 | 1.76317845973479  | 0.11314476797658  |
| F  | -4.62820344096092 | -1.47273280855811 | -1.09624226472379 |
| F  | -5.49973370010695 | 0.23917671999020  | -2.13509458577421 |
| F  | -6.55370617970977 | -0.66888653765213 | -0.45904720890708 |
| H  | -2.40708772764631 | -1.45972603839168 | 0.18576486615603  |
| H  | -1.96770190305022 | -0.28827446710299 | 1.43004641660665  |
| C  | 0.66253453645903  | -1.49338662364933 | 1.88384039009762  |
| C  | -0.29359621011756 | -2.48156428581288 | 2.57218523212689  |
| C  | 0.74546331975652  | -0.20598001968859 | 2.72242704373139  |
| C  | 2.06006275136585  | -2.11330783418689 | 1.76136895489787  |
| H  | -0.38748224956552 | -3.42653065715263 | 2.03261153571868  |
| H  | -1.29348484488198 | -2.06278140720087 | 2.71719816347683  |
| H  | 0.11449333034581  | -2.70767774606223 | 3.56443227405161  |
| H  | 1.44275840129272  | 0.51241554935492  | 2.28517463217849  |
| H  | -0.22822897464439 | 0.27809613475317  | 2.84419264845883  |
| H  | 1.10442829027739  | -0.47851582322072 | 3.72184603193338  |
| H  | 2.03255826887660  | -3.09365067295072 | 1.27664567836005  |
| H  | 2.45535287437088  | -2.26011693226305 | 2.77362217006532  |
| H  | 2.73710539435438  | -1.45240148396409 | 1.21445144385865  |
| C  | 0.13129692995695  | -2.27004846127021 | -1.17196356924953 |
| C  | 1.58478943653427  | -2.36322710601538 | -1.66053512425807 |
| H  | 2.27274019548202  | -2.69498204522183 | -0.88094529054873 |
| H  | 1.61923493444324  | -3.09588800337901 | -2.47566768554887 |
| H  | 1.94465002887855  | -1.40428932296541 | -2.04042308619338 |
| C  | -0.36427826221298 | -3.64661420428407 | -0.70992320290814 |
| H  | -0.39222287444032 | -4.31295941667139 | -1.58035113828648 |
| H  | -1.37617779352051 | -3.61091042221306 | -0.29256410845205 |
| H  | 0.30541520570115  | -4.09813767515775 | 0.02685846076476  |
| C  | -0.74323670183041 | -1.77886214935610 | -2.33996059274013 |

|   |                   |                   |                   |
|---|-------------------|-------------------|-------------------|
| H | -1.81046347902779 | -1.78813313537490 | -2.09740081073709 |
| H | -0.46027463625197 | -0.77475189076494 | -2.67180137832665 |
| H | -0.59571949611334 | -2.46358804813171 | -3.18337070675018 |
| C | 0.77123017093766  | 0.57953089695628  | -0.45074458384147 |
| O | -0.03051238943896 | 1.36069218822624  | -1.05891236868178 |
| N | 2.04766011297954  | 0.58004354510934  | -0.23481502695505 |
| C | 2.89933495162455  | 1.61544788502657  | -0.64837166557693 |
| C | 4.27376398668634  | 1.36053733937102  | -0.50974506198143 |
| C | 5.21692836589091  | 2.31261902508183  | -0.86711138934800 |
| C | 4.80975421123920  | 3.54949987272441  | -1.36216657948757 |
| C | 3.44977273026773  | 3.81663416476203  | -1.49411940640602 |
| C | 2.49514533240405  | 2.86669145215988  | -1.14904574451100 |
| H | 4.57894471947479  | 0.39559457729608  | -0.11433726761407 |
| H | 6.27480045889338  | 2.09137980634642  | -0.75473194079186 |
| H | 5.54528018712480  | 4.29878662662874  | -1.63949342283198 |
| H | 3.12259735758151  | 4.78061204047508  | -1.87458739632443 |
| H | 1.44122429460623  | 3.08677517955615  | -1.25974103098100 |

Point Group:  $C_1$ , Symmetry Number: 1

Total Enthalpy ... -2486.64407499  $E_h$

Final Gibbs free energy ... -2486.74754418  $E_h$

|     |                           |
|-----|---------------------------|
| 0:  | 0.00 $\text{cm}^{** -1}$  |
| 1:  | 0.00 $\text{cm}^{** -1}$  |
| 2:  | 0.00 $\text{cm}^{** -1}$  |
| 3:  | 0.00 $\text{cm}^{** -1}$  |
| 4:  | 0.00 $\text{cm}^{** -1}$  |
| 5:  | 0.00 $\text{cm}^{** -1}$  |
| 6:  | 8.23 $\text{cm}^{** -1}$  |
| 7:  | 14.78 $\text{cm}^{** -1}$ |
| 8:  | 16.28 $\text{cm}^{** -1}$ |
| 9:  | 28.98 $\text{cm}^{** -1}$ |
| 10: | 39.31 $\text{cm}^{** -1}$ |
| 11: | 42.21 $\text{cm}^{** -1}$ |
| 12: | 46.08 $\text{cm}^{** -1}$ |

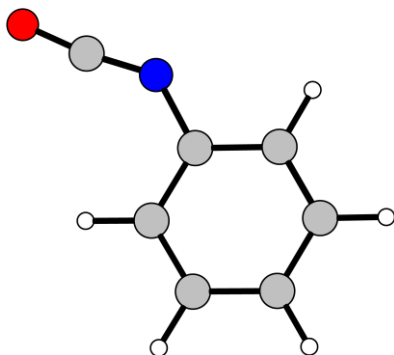

**Figure S65** Molecular structure of PhNCO obtained from geometry optimisation at  $r^2\text{SCAN-3c-D4/def2-TZVPP}$  level of theory.

14

Coordinates from ORCA-job jonas\_phnco\_r2scan-3c\_def2-tzvpp\_d4

|   |                   |                   |                   |
|---|-------------------|-------------------|-------------------|
| C | 0.01290609215540  | 0.00073550114333  | -0.29676041283612 |
| C | -0.22032760268064 | -0.00050080555484 | 1.07881015592310  |
| C | 0.85418171507347  | -0.00144548033292 | 1.97392083327375  |
| C | 2.15360136373669  | -0.00134339492459 | 1.48492577484784  |
| C | 2.39273925533888  | -0.00027482753411 | 0.11268303070775  |
| C | 1.31861643483960  | 0.00086981798576  | -0.77225894447680 |
| N | -1.54705969123008 | -0.00074422234079 | 1.52254542875056  |
| C | -2.10697429236663 | 0.00142411484081  | 2.59335907194295  |
| H | 0.66376288856335  | -0.00215604506315 | 3.04377592481543  |
| H | 2.98556031773665  | -0.00217637904267 | 2.18307623870024  |
| H | 3.41096711519360  | -0.00029782249935 | -0.26330337997126 |

|   |                   |                  |                   |
|---|-------------------|------------------|-------------------|
| H | 1.49553476022976  | 0.00188211796856 | -1.84369856516558 |
| H | -0.83256805258800 | 0.00167515607251 | -0.97682849629889 |
| O | -2.77382730400205 | 0.00235226928145 | 3.55645533978703  |

Point Group:  $C_1$ , Symmetry Number: 1

Total Enthalpy ... -399.54138170  $E_h$

Final Gibbs free energy ... -399.58127097  $E_h$

|     |                          |
|-----|--------------------------|
| 0:  | 0.00 $\text{cm}^{*-1}$   |
| 1:  | 0.00 $\text{cm}^{*-1}$   |
| 2:  | 0.00 $\text{cm}^{*-1}$   |
| 3:  | 0.00 $\text{cm}^{*-1}$   |
| 4:  | 0.00 $\text{cm}^{*-1}$   |
| 5:  | 0.00 $\text{cm}^{*-1}$   |
| 6:  | 51.93 $\text{cm}^{*-1}$  |
| 7:  | 94.66 $\text{cm}^{*-1}$  |
| 8:  | 234.49 $\text{cm}^{*-1}$ |
| 9:  | 392.36 $\text{cm}^{*-1}$ |
| 10: | 412.81 $\text{cm}^{*-1}$ |
| 11: | 473.01 $\text{cm}^{*-1}$ |
| 12: | 495.87 $\text{cm}^{*-1}$ |

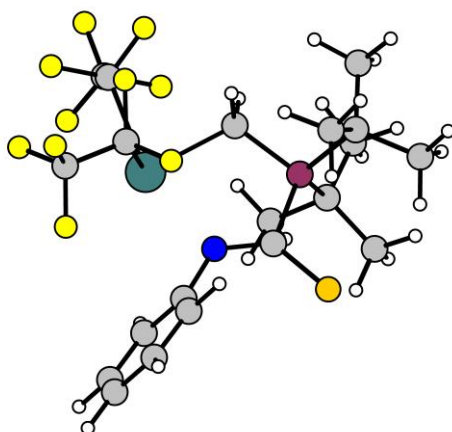

**Figure S66** Molecular structure of the regioisomer of **5** with N...Sb and C...P contacts obtained from geometry optimisation at  $r^2$ SCAN-3c-D4/def2-TZVPP level of theory.

59

Coordinates from ORCA-job jonas\_flip\_phncs\_nc\_r2scan-3c\_def2-tzvpp\_d4

|    |                   |                   |                   |
|----|-------------------|-------------------|-------------------|
| P  | 1.07241083784699  | 0.89970836885949  | 0.16664544486268  |
| C  | -0.68482997612487 | 1.19263499597578  | 0.46935706631772  |
| Sb | -2.06472153768870 | -0.22670335404676 | -0.50297080298118 |
| H  | -0.89206899009737 | 1.09017797601380  | 1.53816602288419  |
| H  | -0.97614248734086 | 2.20442565361332  | 0.17794293446985  |
| C  | -2.36938973853226 | -1.33141497532673 | 1.46558967334324  |
| C  | -3.28470953095102 | -2.56594358299826 | 1.34402829138749  |
| F  | -2.91376930691897 | -0.50364486593217 | 2.40539490667216  |
| F  | -1.17283023534869 | -1.75958110372886 | 1.96868243822177  |
| F  | -4.48910380965239 | -2.19360660714913 | 0.87569644198048  |
| F  | -2.75133486853884 | -3.45001118784052 | 0.48547286015716  |
| F  | -3.45830580553615 | -3.17331645717068 | 2.52932689512164  |
| C  | -3.73127410466691 | 1.28211476754870  | 0.18237964365165  |
| C  | -4.06992710879698 | 2.24858071259644  | -0.96298147326007 |
| F  | -3.38659637673248 | 2.07175424093998  | 1.25781497482936  |
| F  | -4.89641272626268 | 0.63921807534792  | 0.50741457731711  |
| F  | -5.00209377742779 | 3.15911836959142  | -0.64524711610499 |
| F  | -4.49913447568627 | 1.56253489917411  | -2.03887736061832 |
| F  | -2.94391016502480 | 2.92254055309096  | -1.32952016086962 |
| C  | 1.97161660022429  | 1.35577378734387  | 1.76271185884938  |
| C  | 1.71728948298878  | 0.20493479866676  | 2.75248533271398  |

|   |                   |                   |                   |
|---|-------------------|-------------------|-------------------|
| C | 1.37448344492675  | 2.65269473185826  | 2.33860643517117  |
| C | 3.48078859210592  | 1.54470152449359  | 1.56043622119882  |
| H | 2.15055654512567  | 0.48939314955586  | 3.71851638171521  |
| H | 0.65063057877549  | 0.01612635899255  | 2.91332253308226  |
| H | 2.19184241629234  | -0.72062937676641 | 2.41793117559988  |
| H | 1.91437901619237  | 2.87874210751108  | 3.26540114899961  |
| H | 0.79229499659175  | 2.04946623251343  | -3.37537500813665 |
| H | 0.31580172027280  | 2.55881153204202  | 2.59316194036105  |
| H | 1.49742063691743  | 3.50959096078315  | 1.67254409854274  |
| H | 3.93536230815489  | 1.69059275114013  | 2.54766307612084  |
| H | 3.93560301358223  | 0.66896229978856  | 1.09208764778592  |
| H | 3.70335753363265  | 2.43492021060122  | 0.96469985168415  |
| C | 1.53518475264943  | 1.89646481236311  | -1.36570083132912 |
| C | 0.49403138257345  | 1.55036998878604  | -2.44607513630351 |
| C | 2.92884472088653  | 1.53864869800881  | -1.90000329972112 |
| C | 1.47105463380347  | 3.40098149732637  | -1.06108406542542 |
| H | 0.45384599731501  | 0.47443571997941  | -2.64455672675922 |
| H | -0.50909556341428 | 1.90766430323349  | -2.19385338710393 |
| H | 2.98862119941271  | 0.49384994603552  | -2.20927080550946 |
| H | 3.72092503556275  | 1.71714836510930  | -1.17071532347929 |
| H | 3.11996479686794  | 2.17621749889929  | -2.77193887639141 |
| H | 1.58521934600667  | 3.94287290847496  | -2.00718143119929 |
| H | 0.51638174152380  | 3.70889981185507  | -0.62312364007276 |
| H | 2.28240137985626  | 3.72041897481649  | -0.40177568642646 |
| C | 1.28218720210266  | -0.89614308729965 | -0.23571041079885 |
| N | 0.13752138572404  | -1.45392504618742 | -0.54660790428104 |
| S | 2.86444020309127  | -1.49109722381885 | -0.23758257040078 |
| C | 0.04727603017211  | -2.81876517515326 | -0.90506976195352 |
| C | 0.47500460492730  | -3.83039387448729 | -0.04089147592680 |
| C | 0.27340466353141  | -5.15957188592182 | -0.38463649082897 |
| C | -0.34377510202489 | -5.49530540901854 | -1.58820427022074 |
| C | -0.76522740673610 | -4.48790200466634 | -2.44906921784213 |
| C | -0.57761127820454 | -3.15232120176818 | -2.10886179886530 |
| H | 0.95044030397140  | -3.56591505589483 | 0.89698518004997  |
| H | 0.60064657939240  | -5.94161617471816 | 0.29445428766419  |
| H | -0.49689611842555 | -6.53765003674882 | -1.85086352229636 |
| H | -1.24615651467651 | -4.73885091575943 | -3.39003910219616 |
| H | -0.90591657819106 | -2.36118338052813 | -2.77713178345319 |

Point Group:  $C_1$ , Symmetry Number: 1

Total Enthalpy ... -2809.59223533  $E_h$

Final Gibbs free energy ... -2809.69510933  $E_h$

|     |                          |
|-----|--------------------------|
| 0:  | 0.00 cm** <sup>-1</sup>  |
| 1:  | 0.00 cm** <sup>-1</sup>  |
| 2:  | 0.00 cm** <sup>-1</sup>  |
| 3:  | 0.00 cm** <sup>-1</sup>  |
| 4:  | 0.00 cm** <sup>-1</sup>  |
| 5:  | 0.00 cm** <sup>-1</sup>  |
| 6:  | 19.86 cm** <sup>-1</sup> |
| 7:  | 30.98 cm** <sup>-1</sup> |
| 8:  | 33.91 cm** <sup>-1</sup> |
| 9:  | 36.01 cm** <sup>-1</sup> |
| 10: | 42.26 cm** <sup>-1</sup> |
| 11: | 48.40 cm** <sup>-1</sup> |
| 12: | 50.80 cm** <sup>-1</sup> |



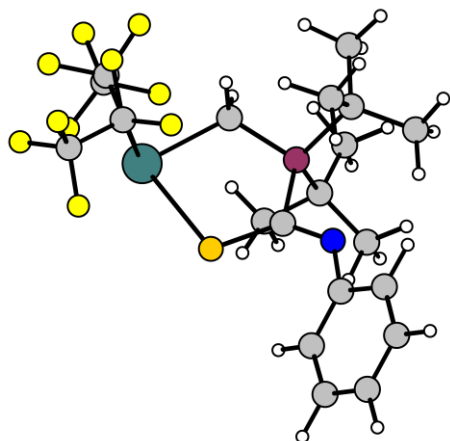

**Figure S67** Molecular structure of the regioisomer of **5** with S...Sb and C...P contacts obtained from geometry optimisation at  $r^2$ SCAN-3c-D4/def2-TZVPP level of theory.

59

Coordinates from ORCA-job jonas\_flp\_phncs\_sc\_r2scan-3c\_def2-tzvpp\_d4

|    |                   |                   |                   |
|----|-------------------|-------------------|-------------------|
| C  | 4.30901079484402  | -1.59231568269537 | 0.23872583519138  |
| C  | 3.20597182140592  | -1.46050897356785 | -0.61793242196131 |
| C  | 3.22516050257150  | -2.11690550347514 | -1.85757451574971 |
| C  | 4.32074819860226  | -2.89356759449793 | -2.21360670678373 |
| C  | 5.39725427333768  | -3.04847234393811 | -1.34406959204026 |
| C  | 5.38462271985816  | -2.39430895686332 | -0.11419050648015 |
| N  | 2.19232360069179  | -0.58926097946517 | -0.20401921301779 |
| C  | 0.93114670231832  | -0.74965344624723 | -0.42805519451434 |
| P  | 0.01093677139377  | 0.74830635902548  | 0.15222477234264  |
| C  | 0.67983172682718  | 1.29360512378331  | 1.83229239932900  |
| C  | 2.04511632796538  | 1.98638478898189  | 1.72927968623639  |
| C  | -1.73688976697781 | 0.39218357260698  | 0.39816308779229  |
| Sb | -2.71006560192801 | -1.16931086610378 | -0.83016160727253 |
| C  | -4.71038385061037 | -0.24009291692267 | 0.01324094895066  |
| C  | -5.27960572806715 | 0.79944300341974  | -0.96300103579689 |
| F  | -4.36448884704927 | 1.79363683038461  | -1.14524769160944 |
| C  | -2.73433503128865 | -2.57040375204728 | 0.97018687807733  |
| C  | -3.08342314708542 | -4.01898764583140 | 0.58263174187533  |
| F  | -3.09935149482798 | -4.83520646482096 | 1.64812247018411  |
| C  | 0.13684506388681  | 2.01872664077404  | -1.23371810920052 |
| C  | -0.33962542800271 | 3.39923774289340  | -0.76011522919718 |
| F  | -3.63890311834816 | -2.16882305776314 | 1.90889515709694  |
| F  | -1.51521958524792 | -2.58554724432092 | 1.58711684184095  |
| F  | -4.30024555188371 | -4.04698146948482 | 0.00615903110419  |
| F  | -2.18659022942474 | -4.49010533047006 | -0.30138976291935 |
| F  | -5.66940846979265 | -1.21041015024654 | 0.15105437274269  |
| F  | -4.59697409217814 | 0.40299335573751  | 1.22786561533529  |
| F  | -5.50870448127183 | 0.23670670817532  | -2.16389132652620 |
| F  | -6.41853230133926 | 1.37122912860707  | -0.54229878063321 |
| C  | 1.57825166954156  | 2.10851364700058  | -1.75623040271247 |
| C  | -0.77393169569292 | 1.54015502619662  | -2.37903542576301 |
| C  | 0.81120700907954  | 0.01450296264703  | 2.67926610502381  |
| C  | 0.32176143812985  | 2.24241804277001  | 2.51505034381925  |
| S  | -0.02068594232035 | -2.00774222289821 | -1.18033856087583 |
| H  | -2.31887980312843 | 1.30727928118665  | 0.25936604682598  |
| H  | -1.89242659369646 | 0.06241746911694  | 1.42892703365948  |
| H  | 1.90299033866023  | 1.16810720226311  | -2.20732794156520 |
| H  | 2.29763052532385  | 2.37509073773492  | -0.97943461469810 |
| H  | 1.60602084008360  | 2.88687542322865  | -2.52788648136351 |
| H  | -0.61795243844771 | 2.20734377682130  | -3.23490917833073 |
| H  | -1.83473603486681 | 1.59331147704519  | -2.11595193202636 |
| H  | -0.53433885148397 | 0.52102007244675  | -2.69900590646939 |

|   |                   |                   |                   |
|---|-------------------|-------------------|-------------------|
| H | -0.37629233195934 | 4.06293474094047  | -1.63203057741742 |
| H | 0.34438825340370  | 3.84786420487736  | -0.03513120914403 |
| H | -1.34631617308977 | 3.37302517129721  | -0.33042820141245 |
| H | 1.09799957931376  | 0.31053630521535  | 3.69507723134700  |
| H | 1.57806006241875  | -0.65383883045304 | 2.28241277241274  |
| H | -0.12920137104134 | -0.54152038105443 | 2.75318385980655  |
| H | -0.48346588490855 | 3.16535710740090  | 1.95394230343593  |
| H | 0.09697787863651  | 2.51965895262493  | 3.48954461801883  |
| H | -1.29138970696441 | 1.77267067239930  | 2.69860044473075  |
| H | 1.97665031832039  | 2.95881931626544  | 1.23287130451773  |
| H | 2.77208788563977  | 1.36280873134513  | 1.20569108097655  |
| H | 2.40752686018800  | 2.16696169062891  | 2.74864016988952  |
| H | 2.39026548428264  | -2.00735819725946 | -2.53975690624596 |
| H | 4.32858247764411  | -3.38999733057465 | -3.18000052354156 |
| H | 6.24320110618593  | -3.66806199881168 | -1.62597521372174 |
| H | 6.22310100866722  | -2.50061941876433 | 0.56823324412952  |
| H | 4.29884340532064  | -1.06012470726458 | 1.18594957229755  |

Point Group:  $C_1$ , Symmetry Number: 1

Total Enthalpy ... -2809.59244734  $E_h$

Final Gibbs free energy ... -2809.69682037  $E_h$

|     |                         |
|-----|-------------------------|
| 0:  | 0.00 $\text{cm}^{*-1}$  |
| 1:  | 0.00 $\text{cm}^{*-1}$  |
| 2:  | 0.00 $\text{cm}^{*-1}$  |
| 3:  | 0.00 $\text{cm}^{*-1}$  |
| 4:  | 0.00 $\text{cm}^{*-1}$  |
| 5:  | 0.00 $\text{cm}^{*-1}$  |
| 6:  | 7.22 $\text{cm}^{*-1}$  |
| 7:  | 17.06 $\text{cm}^{*-1}$ |
| 8:  | 21.53 $\text{cm}^{*-1}$ |
| 9:  | 33.68 $\text{cm}^{*-1}$ |
| 10: | 35.48 $\text{cm}^{*-1}$ |
| 11: | 38.21 $\text{cm}^{*-1}$ |
| 12: | 43.40 $\text{cm}^{*-1}$ |

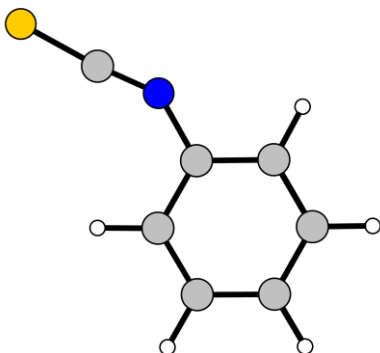

**Figure S68** Molecular structure of PhNCS obtained from geometry optimisation at  $r^2\text{SCAN-3c-D4/def2-TZVPP}$  level of theory.

14

Coordinates from ORCA-job jonas\_phncs\_r2scan-3c\_def2-tzvpp\_d4

|   |                   |                   |                   |
|---|-------------------|-------------------|-------------------|
| C | -0.72217207816599 | 0.20052874956955  | 0.00000009187300  |
| C | -0.66267387748478 | -1.19508987361464 | 0.00000006541992  |
| C | 0.57418021731090  | -1.82668006655011 | -0.00000002830491 |
| C | 1.74839452061109  | -1.07892541315479 | -0.00000002078098 |
| C | 1.68203114605635  | 0.31304144433388  | 0.00000002529600  |
| C | 0.45464420006859  | 0.95985783416700  | 0.00000005712045  |
| H | -1.58607352898607 | -1.76484430993533 | 0.00000005114447  |
| H | 0.61969751689114  | -2.91157688154262 | -0.00000008142008 |
| H | 2.71255150957671  | -1.57760381043363 | -0.00000008097735 |
| H | 2.59474584631231  | 0.90171046741681  | 0.00000000176986  |
| H | 0.39117020201402  | 2.04389640047577  | 0.00000006599034  |

|   |                   |                  |                   |
|---|-------------------|------------------|-------------------|
| N | -1.96288477327010 | 0.81857006665575 | 0.00000001283596  |
| C | -2.50599163128751 | 1.88848848872835 | -0.00000004210573 |
| S | -3.33761946964667 | 3.22862710388400 | -0.00000011786096 |

Point Group:  $C_s$ , Symmetry Number: 1

Total Enthalpy ... -722.48600520  $E_h$

Final Gibbs free energy ... -722.52699700  $E_h$

|     |                          |
|-----|--------------------------|
| 0:  | 0.00 $\text{cm}^{*-1}$   |
| 1:  | 0.00 $\text{cm}^{*-1}$   |
| 2:  | 0.00 $\text{cm}^{*-1}$   |
| 3:  | 0.00 $\text{cm}^{*-1}$   |
| 4:  | 0.00 $\text{cm}^{*-1}$   |
| 5:  | 0.00 $\text{cm}^{*-1}$   |
| 6:  | 54.69 $\text{cm}^{*-1}$  |
| 7:  | 63.15 $\text{cm}^{*-1}$  |
| 8:  | 235.37 $\text{cm}^{*-1}$ |
| 9:  | 359.46 $\text{cm}^{*-1}$ |
| 10: | 411.33 $\text{cm}^{*-1}$ |
| 11: | 411.52 $\text{cm}^{*-1}$ |
| 12: | 447.02 $\text{cm}^{*-1}$ |

### Interacting Quantum Atoms (IQA) and Quantum Theory of Atoms in Molecules (QTAIM)

Free molecular structures of **2** and **6** were optimised at the PBE0-D3BJ/def2-QZVPP<sup>30–32</sup> and r<sup>2</sup>SCAN-3c<sup>18</sup> levels of theory starting from the determined XRD structures. These calculations were performed using the Orca 5.0.3 and 5.0.4 program packages<sup>27</sup> with the settings *TightSCF*, *DefGrid3* and *TightOpt*. The RIJCOSX accelerating approximation<sup>33</sup> was also used. Closed-shell singlet ground state electronic solutions were calculated in all cases.

For the structures obtained, electronic wave functions were calculated at the PBE0/def2-TZVPP level of theory using the Gaussian 16 package.<sup>34</sup> These were further processed by the AIMAll software<sup>35</sup> for analyses using quantum theory of atoms in molecules (QTAIM)<sup>36</sup> and interacting quantum atoms (IQA).<sup>37</sup> For comparison, similar calculations were performed for other molecular systems: Me<sub>2</sub>Sb–SMe, LiF and Xe<sub>2</sub>. All results are summarised in Tables S2 and S3 and the corresponding plots are shown in Figures S59–S64.

Summarising, for the Sb(1)–S(2) interaction in **2** the following conclusions can be made:

1. Stabilising,
2. Weak,
3. Polar,
4. Partially covalent,
5. Essentially due to the electron exchange-correlation effects.

The main results for **6** are as follows:

1. Au–P are typical polarised bonds with large covalent character.
2. Au–Cl is a weak polarised bond with large covalent character. Its stabilisation energy is ~3 times less than that for Au–P.
3. Sb–Cl are strongly stabilising primarily ionic interactions. The stabilisation energy is the same as for bonded Au–P.
4. P...Cl are purely ionic and also stabilising (twice larger than Au–Cl!), although without bond critical points and bond paths!
5. Notably, there are other, weaker bond paths Cl...F and Cl...H.

**Table S2** Results of QTAIM and IQA analyses for selected atom pairs in several compounds. All quantities are in atomic units, unless otherwise stated. Atomic charge  $q$ , electron delocalisation index  $f_{AB}$ , electron density in bond critical point  $\rho_{BCP}$  [ $e \text{ \AA}^{-3}$ ], Laplacian of the electron density in bond critical point  $\nabla^2\rho_{BCP}$  [ $e \text{ \AA}^{-5}$ ], total interaction energy between atoms A and B in IQA analysis  $E_{int}^{AB}$ ,  $V_{eeX}^{AB}/E_{int}^{AB}$  electron exchange-correlation contribution in  $E_{int}^{AB}$  in percent. Negative values indicate different signs of  $V_{eeX}^{AB}$  and  $E_{int}^{AB}$ . For atom numeration see Figure S59; note that the numeration in the article and in the supporting information is partly different.

| Compound, atom pair A–B      | $q(A)$ | $q(B)$ | $f_{AB}$ | $\rho_{BCP}$ | $\nabla^2\rho_{BCP}$ | $E_{int}^{AB}$        | $V_{eeX}^{AB}/E_{int}^{AB}$ , % |
|------------------------------|--------|--------|----------|--------------|----------------------|-----------------------|---------------------------------|
| <b>2</b> , Sb(1)–S(2)        | 1.22   | 0.05   | 0.39     | 0.27         | 0.96                 | $-8.20 \cdot 10^{-2}$ | 84                              |
| <b>2</b> , Sb(1)–C(19)       | 1.22   | -1.03  | 0.80     | 0.67         | 1.69                 | $-5.49 \cdot 10^{-1}$ | 32                              |
| <b>2</b> , S(2)–C(48)        | 0.05   | -1.28  | 1.59     | 1.55         | -9.64                | $-5.95 \cdot 10^{-1}$ | 67                              |
| <b>2</b> , Sb(1)⋯P(4)        | 1.22   | 2.22   | 0.03     | -            | -                    | $4.69 \cdot 10^{-1}$  | -1                              |
| Me <sub>2</sub> Sb–SMe, Sb–S | 1.10   | -0.43  | 0.97     | 0.61         | 1.20                 | $-3.25 \cdot 10^{-1}$ | 57                              |
| LiF, Li–F                    | 0.92   | -0.92  | 0.22     | 0.54         | 16.87                | $-3.27 \cdot 10^{-1}$ | 16                              |
| Xe <sub>2</sub> , Xe⋯Xe      | 0.00   | 0.00   | 0.05     | 0.02         | 0.21                 | $-5.78 \cdot 10^{-3}$ | 97                              |

**Table S3** Results of QTAIM and IQA analyses for selected atom pairs in molecule **6**. All quantities are in atomic units, unless otherwise stated. Atomic charge  $q$ , electron delocalisation index  $f_{AB}$ , electron density in bond critical point  $\rho_{BCP}$  [ $e \text{ \AA}^{-3}$ ], Laplacian of the electron density in bond critical point  $\nabla^2\rho_{BCP}$  [ $e \text{ \AA}^{-5}$ ], total interaction energy between atoms A and B in IQA analysis  $E_{int}^{AB}$ ,  $V_{eeX}^{AB}/E_{int}^{AB}$  electron exchange-correlation contribution in  $E_{int}^{AB}$  in percent. For atom numeration see Figure S62; note that the numeration in the article and in the supporting information is partly different.

| Atom pair A–B | $q(A)$ | $q(B)$ | $f_{AB}$ | $\rho_{BCP}$ | $\nabla^2\rho_{BCP}$ | $E_{int}^{AB}$        | $V_{eeX}^{AB}/E_{int}^{AB}$ , % |
|---------------|--------|--------|----------|--------------|----------------------|-----------------------|---------------------------------|
| Au(1)–P(4)    | -0.06  | 1.47   | 0.90     | 0.73         | 1.66                 | $-1.97 \cdot 10^{-1}$ | 105                             |
| Au(1)–P(5)    | -0.06  | 1.44   | 0.89     | 0.72         | 1.66                 | $-1.93 \cdot 10^{-1}$ | 105                             |
| Au(1)–Cl(92)  | -0.06  | -0.67  | 0.34     | 0.22         | 2.19                 | $-5.88 \cdot 10^{-2}$ | 98                              |
| Sb(2)–Cl(92)  | 1.22   | -0.67  | 0.29     | 0.19         | 1.20                 | $-1.94 \cdot 10^{-1}$ | 25                              |
| Sb(3)–Cl(92)  | 1.21   | -0.67  | 0.27     | 0.18         | 1.13                 | $-1.92 \cdot 10^{-1}$ | 23                              |
| P(4)⋯Cl(92)   | 1.47   | -0.67  | 0.02     | -            | -                    | $-1.32 \cdot 10^{-1}$ | 2                               |
| P(5)⋯Cl(92)   | 1.44   | -0.67  | 0.03     | -            | -                    | $-1.35 \cdot 10^{-1}$ | 2                               |

**Table S4** Optimised Cartesian coordinates of **2**.

---

|    |                   |                  |                   |
|----|-------------------|------------------|-------------------|
| Sb | 7.26069120955552  | 6.70617307251217 | 2.97844295733453  |
| S  | 6.26782785570409  | 5.23424012826055 | 5.24551637445319  |
| S  | 7.67789017883385  | 2.88571662517114 | 6.44207536515756  |
| P  | 7.94866993603683  | 3.43620286448896 | 3.56570359258784  |
| F  | 4.93486521649706  | 7.11232468523563 | 1.07637708361372  |
| F  | 4.43537288424945  | 5.67948940169329 | 2.62460276940982  |
| F  | 4.39391155183667  | 7.71474650718133 | 4.46911572249862  |
| F  | 3.07817087561091  | 8.04929627487239 | 2.79422817133999  |
| F  | 4.94743625355557  | 9.12058261041200 | 2.92734751585099  |
| F  | 7.33967844387640  | 6.48580073147103 | -0.16909069509586 |
| F  | 9.26346173212359  | 6.72649969572382 | 0.82876440386320  |
| F  | 8.70974761251960  | 9.32145080309904 | 1.34189272374594  |
| F  | 6.79026567633047  | 9.15579505668264 | 0.36845952368288  |
| F  | 8.59925505804170  | 8.82455307642305 | -0.75525687766668 |
| C  | 5.08202053631142  | 6.84324288317814 | 2.38861302757735  |
| C  | 4.34976397652754  | 7.95202796720120 | 3.16098737425411  |
| C  | 7.95884819716866  | 7.16374144177519 | 0.82529706548204  |
| C  | 8.01437196897068  | 8.64097275613622 | 0.42649707216505  |
| C  | 7.40924214945600  | 4.62803616675127 | 2.34522413287108  |
| H  | 6.38846637836204  | 4.37480132590877 | 2.064160205665505 |
| H  | 8.03266937909162  | 4.56477164912953 | 1.45774852222764  |
| C  | 9.81015292531151  | 3.51704998031211 | 3.63472496339187  |
| C  | 10.16186797598182 | 4.74268472199343 | 4.48280641444025  |
| H  | 11.24642430844750 | 4.86762546552719 | 4.46162102648466  |
| H  | 9.72381212654772  | 5.66398911401443 | 4.09363989068735  |
| H  | 9.84867704170497  | 4.62056719592181 | 5.51802179911296  |
| C  | 10.38497320026284 | 3.70088510211160 | 2.22930626333765  |
| H  | 10.11845780766081 | 4.65866296214628 | 1.78724515266678  |
| H  | 11.47353177413165 | 3.67380929364696 | 2.31131916762814  |
| H  | 10.09097031352311 | 2.90394897564122 | 1.54672123441096  |
| C  | 10.43362948939839 | 2.27617978441495 | 4.26933259339283  |
| H  | 10.39872466548359 | 1.41978201663497 | 3.59839775013482  |
| H  | 11.48560525993605 | 2.49655952816392 | 4.46380885818038  |
| H  | 9.95738150711128  | 2.01470140110406 | 5.21225201591461  |
| C  | 7.16952780628392  | 1.82043142972172 | 3.04267280982121  |

|   |                  |                   |                  |
|---|------------------|-------------------|------------------|
| C | 5.66764539399812 | 1.97702942834306  | 3.30456724940086 |
| H | 5.22962925790593 | 2.84701570308903  | 2.81591085830603 |
| H | 5.16564803804512 | 1.09130215905007  | 2.91030724956687 |
| H | 5.45512640253202 | 2.04236325054047  | 4.37058467134527 |
| C | 7.41748253897430 | 1.60723325393275  | 1.54872681383021 |
| H | 8.47581961038040 | 1.47626507322187  | 1.32368002523984 |
| H | 6.90591537831836 | 0.68973245011581  | 1.25054507569762 |
| H | 7.02676256254614 | 2.41602583089053  | 0.93310191896890 |
| C | 7.66782387270366 | 0.59854237316540  | 3.80929852023270 |
| H | 8.68418099997337 | 0.32679641161413  | 3.53619210453289 |
| H | 7.61982840839650 | 0.74581053392666  | 4.88610643988083 |
| H | 7.02063536073471 | -0.24089206919643 | 3.54502973158392 |
| C | 7.25873890304559 | 3.89039290664413  | 5.19830337080115 |

---

**Table S5** Optimised Cartesian coordinates of **6**.

|    |                  |                   |                   |
|----|------------------|-------------------|-------------------|
| Au | 3.30533015814677 | 6.94081540112967  | 4.83992743043433  |
| Sb | 5.35353389933368 | 9.33451817518781  | 7.52510968628018  |
| Sb | 3.33384019609624 | 10.68033881158383 | 3.96614527899271  |
| P  | 3.82588463322386 | 6.21210189466914  | 7.00368385601110  |
| P  | 2.57005857641383 | 7.58499626132714  | 2.70316140699873  |
| F  | 6.57412541949649 | 9.72941898570595  | 10.46079358412020 |
| F  | 4.71985323458440 | 8.54158855543514  | 10.48872083871619 |
| F  | 3.29448751215505 | 10.76796772839221 | 9.75960719348659  |
| F  | 5.13308538774793 | 11.94381946682484 | 9.67845478396745  |
| F  | 4.48214888187557 | 11.06206879931002 | 11.56321397124453 |
| F  | 8.02668608699668 | 8.40465127721463  | 8.66417891767865  |
| F  | 7.99012185524944 | 8.24751376838790  | 6.48632982288306  |
| F  | 8.11115711590195 | 10.95351801864887 | 6.23590428586511  |
| F  | 8.03390730120302 | 11.19809649120810 | 8.40118595267908  |
| F  | 9.72360765295331 | 10.17184034935797 | 7.47864438456401  |
| F  | 2.43121687569656 | 12.96475639620672 | 1.92438081176337  |
| F  | 0.90700502198858 | 11.40856538626350 | 2.17949848218628  |
| F  | 0.24707089900621 | 13.85874866277609 | 3.26714638953311  |
| F  | 1.98793643853707 | 13.75108564275965 | 4.57467714933990  |

|   |                  |                   |                   |
|---|------------------|-------------------|-------------------|
| F | 0.42161030061071 | 12.23511816292579 | 4.71241564553190  |
| C | 5.35677067298503 | 9.60140879304967  | 9.86428332679862  |
| C | 4.55706932228401 | 10.86315243571227 | 10.23701002406177 |
| C | 7.61589342839969 | 9.04181242159306  | 7.52778092304021  |
| C | 8.39631738867613 | 10.36418679792213 | 7.40688622220498  |
| C | 5.20922257097070 | 7.14462151445389  | 7.76557322012719  |
| H | 6.11797456868596 | 6.79412826226592  | 7.26570799984742  |
| H | 5.29597890561213 | 6.91708232191819  | 8.83211214215919  |
| C | 4.51039684439799 | 4.44195107818148  | 6.93712433918265  |
| C | 5.47076897001874 | 4.40980720687497  | 5.73390348122699  |
| H | 4.92837707462978 | 4.5552888693641   | 4.79337893594933  |
| H | 5.96053537918968 | 3.42886031307525  | 5.69983493643972  |
| H | 6.25522872381991 | 5.17163293095999  | 5.79026550541723  |
| C | 5.28162140801673 | 4.04879185244235  | 8.20407767289346  |
| H | 6.16554060572159 | 4.67377559003956  | 8.35767622541797  |
| H | 5.62788267084957 | 3.01376632065397  | 8.09358414237782  |
| H | 4.66584924303411 | 4.09632943745975  | 9.10515644506495  |
| C | 3.37970781538722 | 3.43964632798735  | 6.67811407312920  |
| H | 2.74312240918741 | 3.29991108750787  | 7.55628577825983  |
| H | 3.82152441587835 | 2.46535748136849  | 6.43544781431532  |
| H | 2.75484682892619 | 3.74570437468135  | 5.83116094759540  |
| C | 2.33437589779120 | 6.40963406641449  | 8.14673049951527  |
| C | 2.53811517771076 | 5.78276763091198  | 9.52997055043146  |
| H | 2.56463835996685 | 4.69032926439673  | 9.48378125375245  |
| H | 1.69408482472938 | 6.06301627264999  | 10.17222199132854 |
| H | 3.44920653871232 | 6.14038940453798  | 10.01936231452032 |
| C | 1.08169474049409 | 5.82254423265676  | 7.47915802013096  |
| H | 0.90818843247615 | 6.28017872387503  | 6.49947421388369  |
| H | 0.21537037461210 | 6.03704929264274  | 8.11657800973912  |
| H | 1.13574687330366 | 4.74056842395094  | 7.34590367552991  |
| C | 2.12048496458102 | 7.92463023777170  | 8.29897614081177  |
| H | 2.89617675284972 | 8.38486795511380  | 8.91331052665458  |
| H | 1.16506853090266 | 8.09863005633832  | 8.80839526207840  |
| H | 2.07749516965976 | 8.43473012913318  | 7.32806561956704  |
| C | 1.87527574449120 | 12.13872949882404 | 2.85171936858677  |
| C | 1.11537551825367 | 13.02063756016279 | 3.85695931232684  |
| C | 3.13692688960703 | 9.28233207215120  | 2.27727893832358  |



|    |                   |                   |                   |
|----|-------------------|-------------------|-------------------|
| H  | 2.51637596279944  | 9.73570527698928  | 1.49981777918122  |
| H  | 4.15494788914126  | 9.17902857963799  | 1.89586931035726  |
| C  | 3.35984745239797  | 6.52901733944184  | 1.33840791600727  |
| C  | 4.84968210827776  | 6.41239736388575  | 1.70751131064981  |
| H  | 5.34715503375566  | 7.38159977444205  | 1.80722053059045  |
| H  | 5.36056912422985  | 5.85107270909162  | 0.91558232690909  |
| H  | 4.98826140998520  | 5.87869200414200  | 2.65341061811236  |
| C  | 2.75020935083120  | 5.12253411581055  | 1.32238389237285  |
| H  | 2.70332719968500  | 4.68649175663334  | 2.32705202711999  |
| H  | 3.38098243969933  | 4.47310800969436  | 0.70330679769521  |
| H  | 1.74763077685378  | 5.11534361195881  | 0.88645501245178  |
| C  | 3.23524321737195  | 7.16800757972635  | -0.05110494988404 |
| H  | 2.19635983861063  | 7.30569013340595  | -0.35994683785445 |
| H  | 3.71371063055128  | 6.50506382193296  | -0.78260538274849 |
| H  | 3.74218464856684  | 8.13527779380360  | -0.10771943746554 |
| C  | 0.67763952589747  | 7.60077242466455  | 2.68194220802553  |
| C  | 0.13850586129509  | 6.22147007476550  | 3.09327469757161  |
| H  | 0.27514531376301  | 5.46493385890944  | 2.31927103028434  |
| H  | -0.93843882290970 | 6.31192066622220  | 3.27992239797731  |
| H  | 0.61618013978182  | 5.86660837631349  | 4.01350982576687  |
| C  | 0.07870393106914  | 8.01634820947292  | 1.33489233433034  |
| H  | 0.46813619532962  | 8.97509802827328  | 0.98000400039314  |
| H  | -1.00657024514093 | 8.12866254214936  | 1.44848850454900  |
| H  | 0.24878016978910  | 7.25783817691092  | 0.56546649094761  |
| C  | 0.25916214254850  | 8.60262230650550  | 3.77244990236157  |
| H  | 0.68725581289380  | 8.33639538311603  | 4.74651510207877  |
| H  | -0.83331420855009 | 8.58262531770835  | 3.86717213285632  |
| H  | 0.53825570764898  | 9.62877592758150  | 3.52888551629213  |
| F  | 4.73139195383963  | 13.23580663845966 | 3.28816315686418  |
| F  | 6.11769438175934  | 11.79481958168278 | 4.17251889071775  |
| F  | 6.25607616846861  | 10.41365948612558 | 1.82779194537793  |
| F  | 4.75193518807144  | 11.70635683071900 | 0.92683142684832  |
| F  | 6.66545569075726  | 12.53447177870062 | 1.55909915906770  |
| C  | 5.11244370358951  | 11.92379189010050 | 3.26733339497319  |
| C  | 5.71196217464724  | 11.64269875145218 | 1.87125267851110  |
| Cl | 5.55759064866349  | 8.73251538763809  | 4.59254456574314  |

---

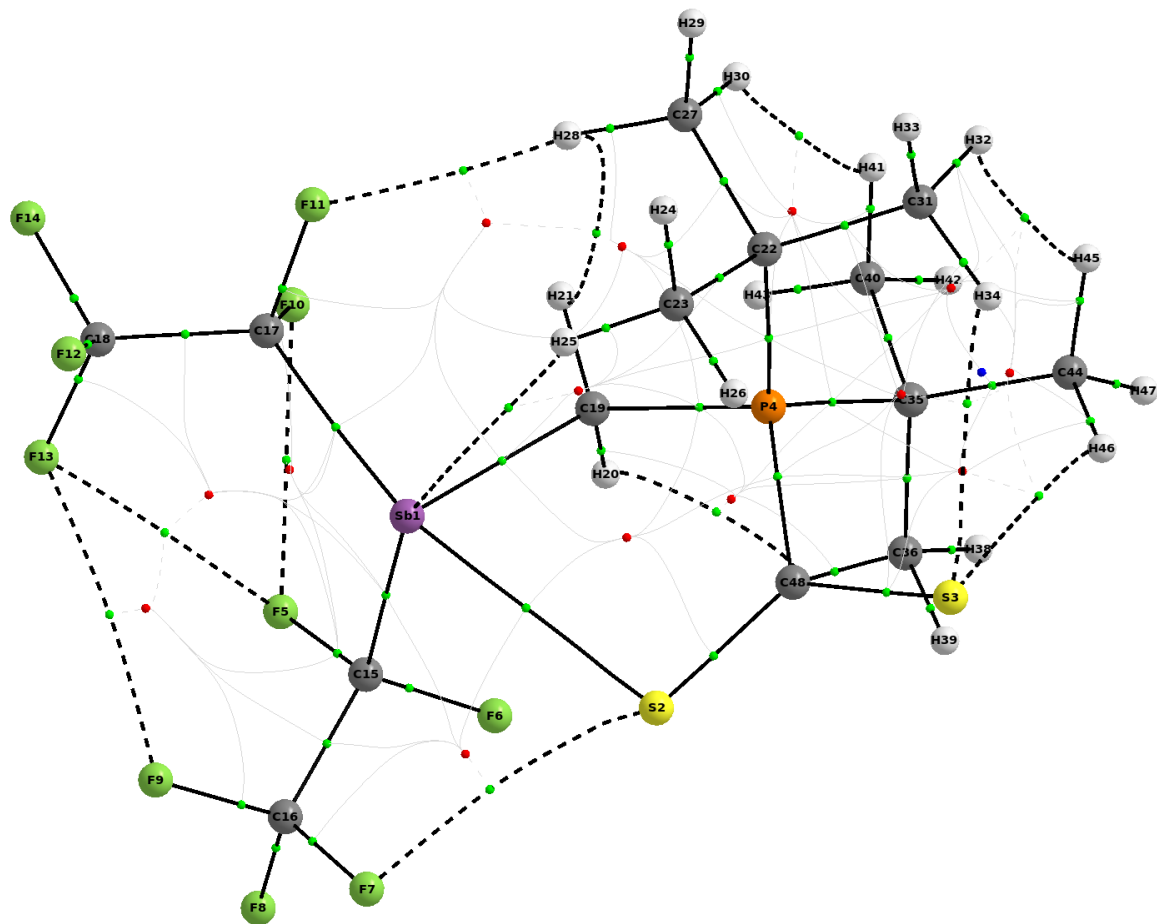

Figure S69 Bond paths and critical points in **2**. Internal working numeration of atoms is shown.

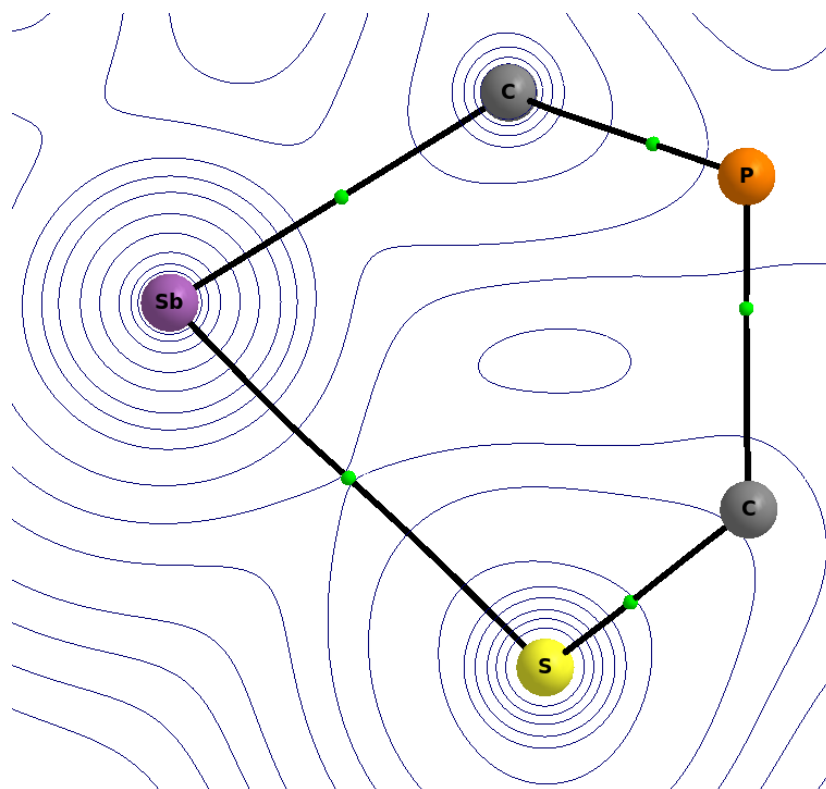

**Figure S70** Contour plot of electron density in the plane C(19)–Sb(1)–S(2) of **2**.

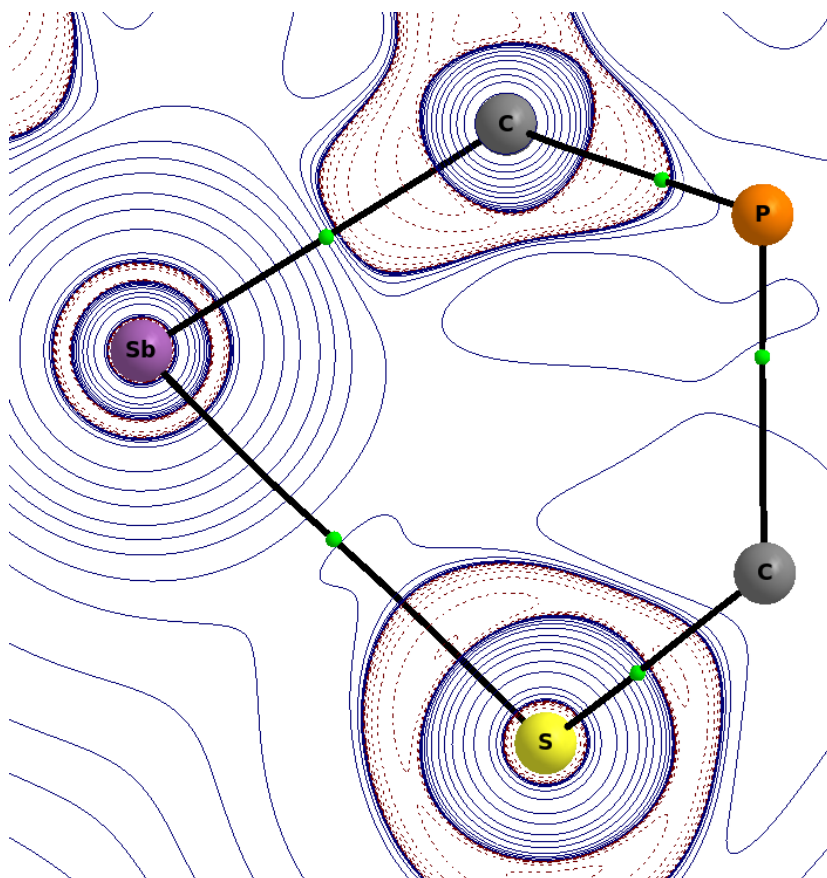

**Figure S71** Contour plot of the Laplacian  $\nabla^2\rho$  (positive and negative isovalues are full blue and dashed red lines, respectively) of the electron density of **2** in the plane C(19)–Sb(1)–S(2).

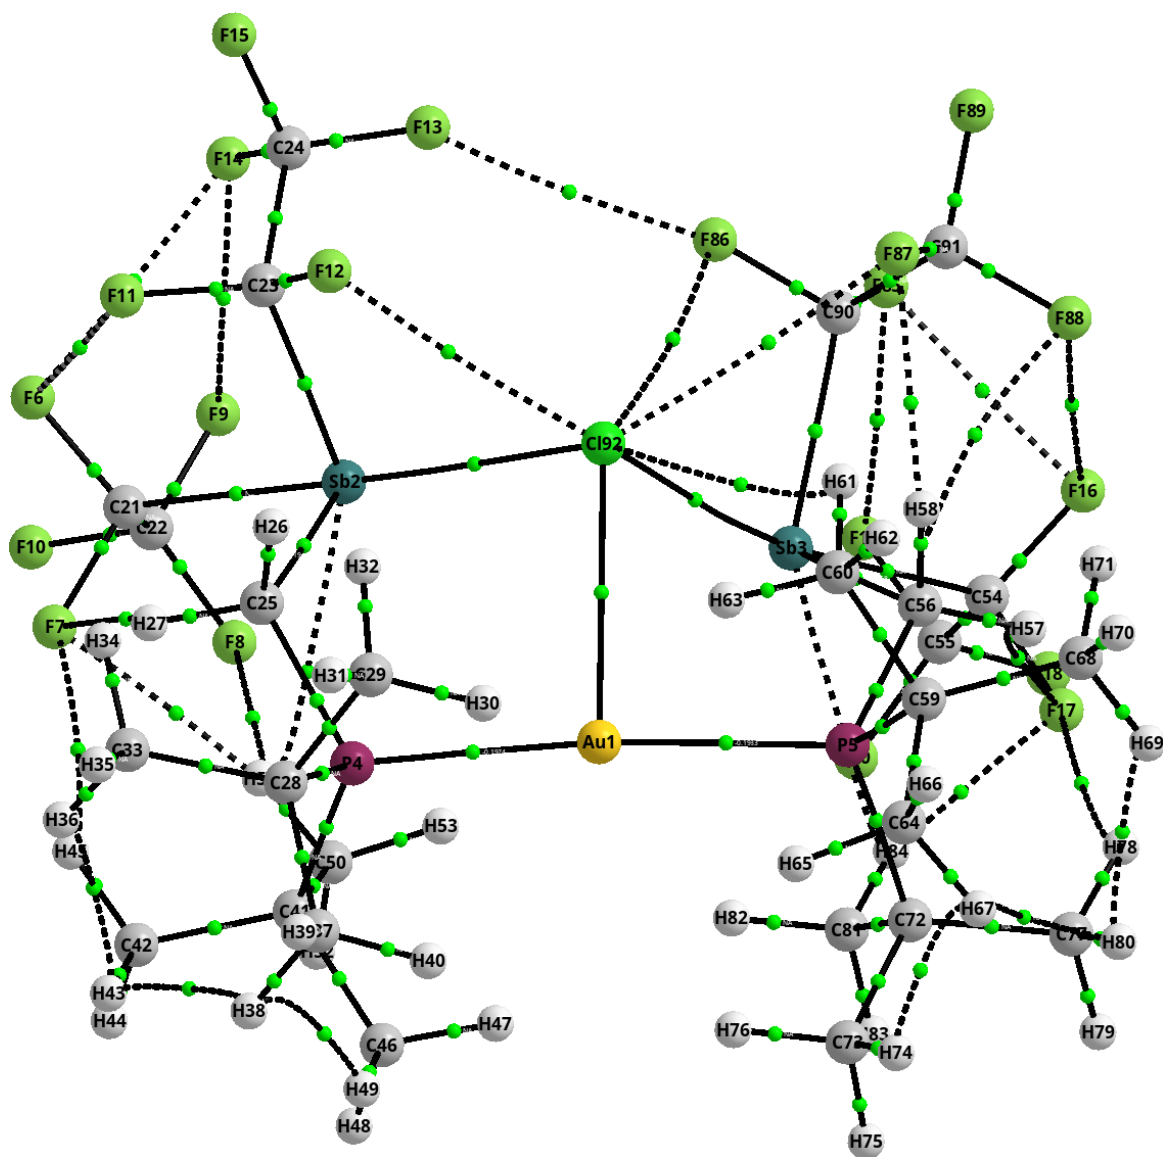

Figure S72 Bond paths and critical points in **6**. Internal working numeration of atoms is shown.

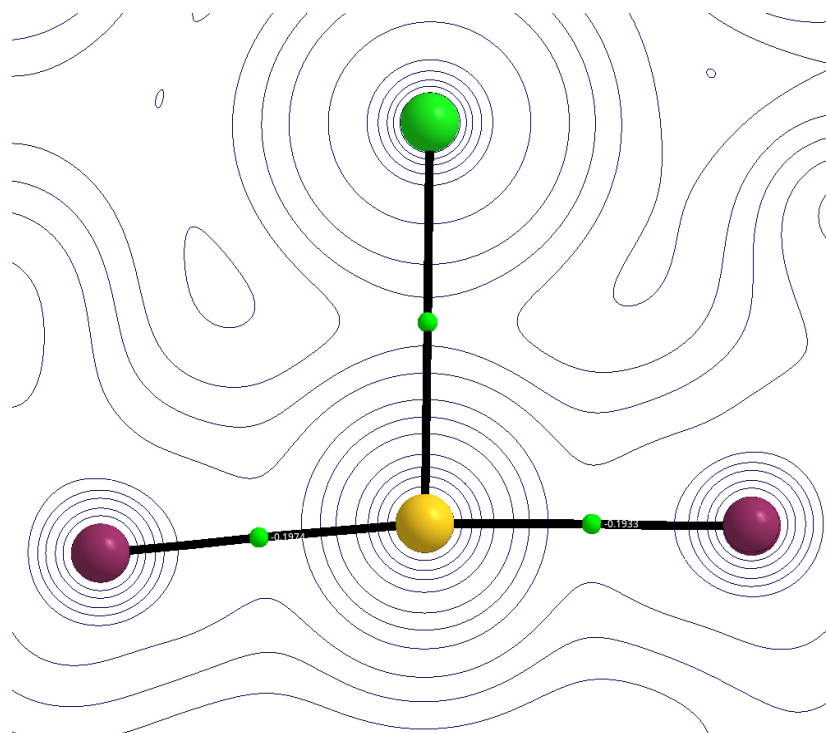

**Figure S73** Contour plot of electron density in the plane Cl(92)-Au(1)(P4)-P(5) of **6**.

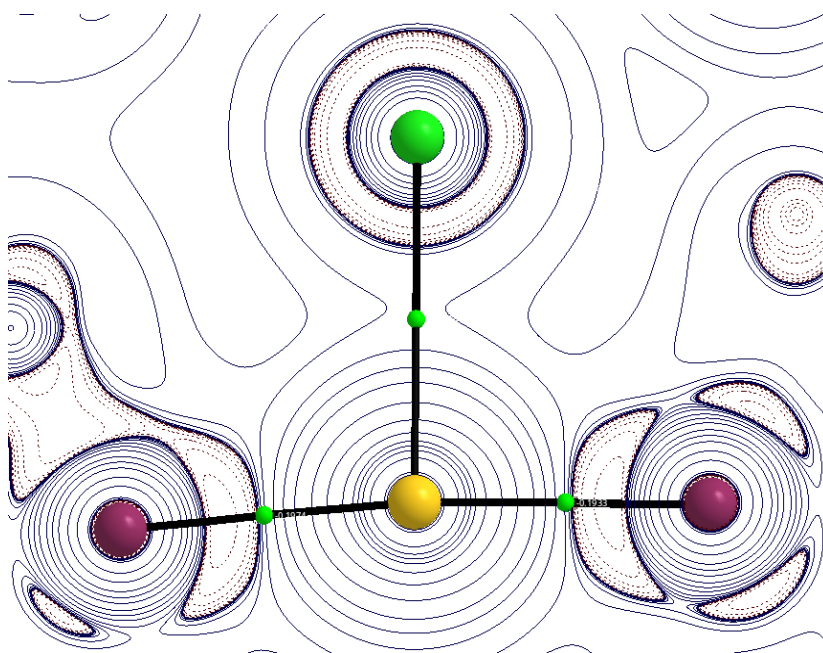

**Figure S74** Contour plot of Laplacian  $\nabla^2\rho$  (positive and negative isovalues are full blue and dashed red lines, respectively) of the electron density of **6** in the plane Cl(92)-Au(1)(P4)-P(5).

#### Fluoride Ion Affinity (FIA) of **1**

The fluoride ion affinity of **1** was computed as described by Greb et al.<sup>38</sup> Geometry optimization and vibrational analysis was performed with the composite functional PBEh-3c.<sup>22,31,39-41</sup> The thermal corrections obtained were combined with the electronic energy calculated at the DSD-BLYP(GD3BJ)/def2-QZVPP<sup>31-32,40-43</sup> level of theory (method L3). To set up anisodesmic reaction equation for FIA computation the  $\text{Me}_3\text{SiF}/\text{Me}_3\text{Si}^+$  system was used with its anchor value of  $952.5 \text{ kJ mol}^{-1}$ .<sup>38</sup> All calculations were performed with Orca 5.0.<sup>24-27</sup> and the energetic data is summarized in Table S6. The cartesian coordinates of the optimized molecular structures are included below. Attempts to calculate the hydride ion affinity failed.

**Table S6.** The total correction to the electronic energy and thermal enthalpy correction obtained from PBEh-3c geometry optimization and vibrational analysis for **1**,  $[\mathbf{1}\text{-F}]^-$  and the reference system  $\text{Me}_3\text{SiF}/\text{Me}_3\text{Si}^+$  as well as the electronic energy calculated at the DSD-BLYP(GD3BJ)/def2-QZVPP level of theory.

|                           | Total correction to electronic energy / $E_h$ | Thermal enthalpy correction / $E_h$ | Electronic energy / $E_h$ | Enthalpy / $E_h$ | FIA / $\text{kJ mol}^{-1}$ |
|---------------------------|-----------------------------------------------|-------------------------------------|---------------------------|------------------|----------------------------|
| $\text{Me}_3\text{SiF}$   | 0.12525603                                    | 0.00094421                          | -508.8756731913           | -508.74947295    |                            |
| $\text{Me}_3\text{Si}^+$  | 0.11999520                                    | 0.00094421                          | -408.6884443066           | -408.56750490    |                            |
| <b>1</b>                  | 0.36630269                                    | 0.00094421                          | -2086.4277560434          | -2086.06050914   | 278                        |
| $[\mathbf{1}\text{-F}]^-$ | 0.36824433                                    | 0.00094421                          | -2186.3547241650          | -2185.98553563   |                            |

$\text{Me}_3\text{SiF}$ :

14

Coordinates from ORCA-job jonas\_me3sif\_pbeh-3c\_def2-msvp

```

C 0.03223021586528 -0.03689916274419 -0.17684604104881
Si 0.03539906992482 0.03342238318567 1.69323025530693
C 1.77730188883268 0.09847973555284 2.37396100304842
H 0.50421189847945 0.84773661614874 -0.60767339131342
H -0.98157999809898 -0.08985000911845 -0.57557955197408
H 2.29842062956767 0.99573877991475 2.03537511713709
H 2.36878362771907 -0.75970544186495 2.05263599927881
H 0.57574628400275 -0.90701345253884 -0.54716360934047
H 1.78550746751294 0.11246152814377 3.46467451093120

```

|   |                   |                   |                  |
|---|-------------------|-------------------|------------------|
| C | -0.99040727852269 | 1.46880461299345  | 2.31958422886217 |
| H | -1.02140942014689 | 1.50225968005432  | 3.40930952520038 |
| H | -0.57863432725119 | 2.42079360242026  | 1.97916668781449 |
| H | -2.02004335357641 | 1.41740254836160  | 1.96336597455852 |
| F | -0.64977270430850 | -1.34371342050898 | 2.22794429153873 |

Point Group:  $C_1$ , Symmetry Number: 1

|     |                           |
|-----|---------------------------|
| 0:  | 0.00 cm** <sup>-1</sup>   |
| 1:  | 0.00 cm** <sup>-1</sup>   |
| 2:  | 0.00 cm** <sup>-1</sup>   |
| 3:  | 0.00 cm** <sup>-1</sup>   |
| 4:  | 0.00 cm** <sup>-1</sup>   |
| 5:  | 0.00 cm** <sup>-1</sup>   |
| 6:  | 134.86 cm** <sup>-1</sup> |
| 7:  | 155.32 cm** <sup>-1</sup> |
| 8:  | 156.16 cm** <sup>-1</sup> |
| 9:  | 189.59 cm** <sup>-1</sup> |
| 10: | 191.52 cm** <sup>-1</sup> |
| 11: | 233.68 cm** <sup>-1</sup> |
| 12: | 280.95 cm** <sup>-1</sup> |

$Me_3Si^+$

13

Coordinates from ORCA-job jonas\_me3si+\_pbeh-3c\_def2-msvp

|    |                   |                   |                   |
|----|-------------------|-------------------|-------------------|
| Si | -0.00206938228384 | -0.00005263858114 | 0.00231734055847  |
| C  | -0.01525883980758 | 0.09019991428207  | 1.83259635241751  |
| C  | 1.58193594831287  | -0.22023344877842 | -0.89053842945871 |
| C  | -1.56774959213409 | 0.13215893411611  | -0.94059018784654 |
| H  | 0.32777202921434  | -0.86080438292304 | 2.25507576475128  |
| H  | 0.69496648519360  | 0.84111283246969  | 2.19047584582851  |
| H  | -0.99773995322048 | 0.30924258670431  | 2.24715253468615  |
| H  | 2.44989840651760  | -0.22859338736725 | -0.23358974344146 |
| H  | 1.71591536966484  | 0.56898809612536  | -1.63683823192286 |
| H  | 1.57070159364161  | -1.15750167699511 | -1.45685401107184 |
| H  | -1.99750931559327 | 1.13149486007440  | -0.80885537466944 |
| H  | -1.44237321072027 | -0.04385197035459 | -2.00753381493732 |
| H  | -2.31848953878533 | -0.56215971877239 | -0.55281904489374 |

Point Group:  $C_1$ , Symmetry Number: 1

|     |                           |
|-----|---------------------------|
| 0:  | 0.00 cm** <sup>-1</sup>   |
| 1:  | 0.00 cm** <sup>-1</sup>   |
| 2:  | 0.00 cm** <sup>-1</sup>   |
| 3:  | 0.00 cm** <sup>-1</sup>   |
| 4:  | 0.00 cm** <sup>-1</sup>   |
| 5:  | 0.00 cm** <sup>-1</sup>   |
| 6:  | 41.94 cm** <sup>-1</sup>  |
| 7:  | 46.46 cm** <sup>-1</sup>  |
| 8:  | 79.90 cm** <sup>-1</sup>  |
| 9:  | 214.11 cm** <sup>-1</sup> |
| 10: | 214.71 cm** <sup>-1</sup> |
| 11: | 226.01 cm** <sup>-1</sup> |
| 12: | 619.94 cm** <sup>-1</sup> |

$(F_5C_2)_3SbCH_2P(CH_3)_3$  (1)

45

Coordinates from ORCA-job jonas\_flp\_pbeh-3c\_def2-msvp

|    |                   |                   |                   |
|----|-------------------|-------------------|-------------------|
| Sb | -0.65331955228676 | -0.67590733231297 | -0.37045133892419 |
| P  | 2.52505341822511  | 0.30210783800830  | -0.35597802766942 |
| F  | -1.70481098596768 | 1.90809749769698  | 0.85052187593805  |
| F  | -0.16766530498031 | 2.22535870039469  | -0.65779365025363 |
| F  | -1.86864278933799 | 1.38574782223146  | -2.59694643261188 |



|   |                   |                   |                   |
|---|-------------------|-------------------|-------------------|
| F | -2.64200425029697 | 3.05160347028161  | -1.46320488646787 |
| F | -3.41948689719190 | 1.06525253607587  | -1.13475564870596 |
| F | -1.37425438457679 | -0.56012226084692 | 2.58384894058765  |
| F | -1.13102627419034 | -2.55358014638939 | 1.72992037157762  |
| F | -3.50690797706338 | -2.19499375958161 | 0.36182307770542  |
| F | -3.78533295192762 | -0.31576166408017 | 1.39102390565569  |
| F | -3.64731841367399 | -2.14871728909035 | 2.51503606908143  |
| C | -1.25264248253492 | 1.47894793353724  | -0.34535623002999 |
| C | -2.31871475508655 | 1.76719462385291  | -1.40104067392055 |
| C | -1.66882008746663 | -1.31996288847613 | 1.50982316355538  |
| C | -3.18393373728098 | -1.49842601078651 | 1.45375026552218  |
| C | 1.15597886214797  | -0.28628394987643 | 0.75911261046907  |
| H | 0.90811320654279  | 0.49477004765405  | 1.47583067606565  |
| H | 1.40291442281892  | -1.17907424770468 | 1.33454396666466  |
| C | 3.36640544158483  | -1.33262498006591 | -0.83609134075038 |
| C | 2.57750170086944  | -1.85877863822383 | -2.04229325491660 |
| H | 3.06075651861730  | -2.75633813680764 | -2.43776273220518 |
| H | 1.55564354395163  | -2.14352748826439 | -1.78578583865624 |
| H | 2.52478083006954  | -1.12397793975892 | -2.84624077940171 |
| C | 3.40381903924019  | -2.42402495339818 | 0.23107405529915  |
| H | 2.40847066842139  | -2.78644007281953 | 0.49066391328579  |
| H | 3.95683463124976  | -3.28846846988813 | -0.14723071927105 |
| H | 3.89441243203281  | -2.10645013946429 | 1.14936662678587  |
| C | 4.79006497116080  | -1.04375534184040 | -1.31409666770247 |
| H | 5.46635706931107  | -0.80901084811127 | -0.49248079231786 |
| H | 5.19292679457949  | -1.92706962591632 | -1.81604135678425 |
| H | 4.82549136510703  | -0.21956173072714 | -2.02879047742450 |
| C | 3.60517102729692  | 1.25979996401904  | 0.87531274906519  |
| C | 2.70912165887142  | 2.34089501497445  | 1.49547756656458  |
| H | 2.01929594442698  | 1.94356164706996  | 2.23928491763087  |
| H | 3.33494247142805  | 3.07220431060907  | 2.01209894085528  |
| H | 2.12774887361668  | 2.88017764273056  | 0.74648608923382  |
| C | 4.23121088021329  | 0.43394849382755  | 1.99345645895803  |
| H | 4.97686807090042  | -0.26664475080888 | 1.61854544823670  |
| H | 4.73729598461656  | 1.09064405963759  | 2.70683250840335  |
| H | 3.48510994348868  | -0.13403057902240 | 2.55212909760619  |
| C | 4.69338979026329  | 1.99164030718105  | 0.08223377020859  |
| H | 5.42752251722330  | 1.32001754760780  | -0.35657828310012 |
| H | 4.26384159548372  | 2.58851040721245  | -0.72353853246137 |
| H | 5.23499217010310  | 2.67102237965979  | 0.74553759861892  |

Point Group:  $C_1$ , Symmetry Number: 1

|     |                          |
|-----|--------------------------|
| 0:  | 0.00 cm** <sup>-1</sup>  |
| 1:  | 0.00 cm** <sup>-1</sup>  |
| 2:  | 0.00 cm** <sup>-1</sup>  |
| 3:  | 0.00 cm** <sup>-1</sup>  |
| 4:  | 0.00 cm** <sup>-1</sup>  |
| 5:  | 0.00 cm** <sup>-1</sup>  |
| 6:  | 16.90 cm** <sup>-1</sup> |
| 7:  | 23.43 cm** <sup>-1</sup> |
| 8:  | 34.09 cm** <sup>-1</sup> |
| 9:  | 42.43 cm** <sup>-1</sup> |
| 10: | 46.84 cm** <sup>-1</sup> |
| 11: | 51.20 cm** <sup>-1</sup> |
| 12: | 57.52 cm** <sup>-1</sup> |

$[(F_5C_2)_3Sb(F)CH_2P(CH_3)_3]^- ([1-F]^-)$

46

Coordinates from ORCA-job jonas\_flip\_f\_pbeh-3c\_def2-msvp

|   |                  |                  |                  |
|---|------------------|------------------|------------------|
| C | 1.16580932035303 | 0.16451351323966 | 0.45380491724807 |
|---|------------------|------------------|------------------|

|    |                   |                   |                   |
|----|-------------------|-------------------|-------------------|
| P  | 2.70412651855450  | 0.17874366425675  | -0.58505797327181 |
| C  | 3.82808435437397  | 1.36357518578013  | 0.38574748272766  |
| C  | 5.12637627418646  | 1.57564151582678  | -0.39986534019276 |
| C  | 3.33363477697287  | -1.61035629788894 | -0.37992889543483 |
| C  | 4.82549165706601  | -1.69342897530967 | -0.70292919796550 |
| Sb | -0.60678242348704 | 0.35039754518225  | -0.81639231273067 |
| C  | -1.38144975456885 | -1.57663610470088 | 0.44004387540165  |
| C  | -2.74575007670933 | -2.17858819466208 | 0.14962949325365  |
| F  | -2.91301289308990 | -3.41453758934561 | 0.65725645680055  |
| C  | -1.86716666873124 | 1.64658621008947  | 0.56026492802065  |
| C  | -3.00598616575575 | 2.33392586606834  | -0.19056464548141 |
| F  | -3.80744190407385 | 1.40700512168391  | -0.72937256470460 |
| F  | -2.46469205293931 | 0.97557869623780  | 1.58385907147992  |
| F  | -1.13003956546469 | 2.62989339333296  | 1.14361712874977  |
| F  | -2.55985358733874 | 3.10541692287392  | -1.17648920596508 |
| F  | -3.76458822142403 | 3.10396927044019  | 0.60322816530793  |
| F  | -1.23741939536089 | -1.61134378965610 | 1.80549126625374  |
| F  | -0.49335657213874 | -2.54379193412096 | -0.02937350217281 |
| F  | -2.93481363400126 | -2.27782505784267 | -1.17320678080589 |
| F  | -3.73599344481292 | -1.43036082357292 | 0.63955849655200  |
| C  | 2.58728730471923  | -2.38911003818003 | -1.47125151709345 |
| C  | 3.08318136037342  | -2.29468472616894 | 0.96408967645467  |
| C  | 3.08997235147974  | 2.71013163208825  | 0.39554943409408  |
| C  | 4.14577195143654  | 0.94913419152589  | 1.81752317365891  |
| H  | 1.13678932179449  | 1.06119263697079  | 1.07055915343908  |
| H  | 1.11237433707445  | -0.68501377659766 | 1.12625207826254  |
| H  | 2.87978600115720  | -3.44427744380570 | -1.44536129972547 |
| H  | 1.50718802539090  | -2.35030015909816 | -1.34160481230861 |
| H  | 2.81719364705240  | -1.99877789759482 | -2.46349446032502 |
| H  | 2.02260971065303  | -2.44810128020980 | 1.15678335645954  |
| H  | 3.54802681475933  | -3.28610569964962 | 0.96200894239617  |
| H  | 3.50157804496003  | -1.73902938152985 | 1.80266982363040  |
| H  | 5.44848438882376  | -1.29366345378354 | 0.09805701863040  |
| H  | 5.11342064494735  | -2.74088502855818 | -0.83852706893039 |
| H  | 5.07521708819387  | -1.16399011845758 | -1.62458369371271 |
| H  | 2.22700438321786  | 2.71684224406883  | 1.05953650245913  |
| H  | 3.77143775081048  | 3.49355451775339  | 0.74120781709124  |
| H  | 2.72212470316236  | 2.98257593453629  | -0.59386697515536 |
| H  | 4.77453703937351  | 0.05820455790140  | 1.85537960010128  |
| H  | 4.68315243128291  | 1.74779162748394  | 2.34031395710102  |
| H  | 3.23553938938087  | 0.73959910924592  | 2.38137221755686  |
| H  | 5.77478629770785  | 0.70262982973821  | -0.38727286540865 |
| H  | 4.92180406936568  | 1.82502740803351  | -1.44243800784043 |
| H  | 5.69433894487121  | 2.40377744770083  | 0.03541217626914  |
| F  | 0.19614245640286  | 2.16015072868590  | -1.24140109017290 |

Point Group:  $C_1$ , Symmetry Number: 1

|     |                          |
|-----|--------------------------|
| 0:  | 0.00 cm** <sup>-1</sup>  |
| 1:  | 0.00 cm** <sup>-1</sup>  |
| 2:  | 0.00 cm** <sup>-1</sup>  |
| 3:  | 0.00 cm** <sup>-1</sup>  |
| 4:  | 0.00 cm** <sup>-1</sup>  |
| 5:  | 0.00 cm** <sup>-1</sup>  |
| 6:  | 13.78 cm** <sup>-1</sup> |
| 7:  | 20.29 cm** <sup>-1</sup> |
| 8:  | 31.23 cm** <sup>-1</sup> |
| 9:  | 37.69 cm** <sup>-1</sup> |
| 10: | 40.26 cm** <sup>-1</sup> |
| 11: | 50.06 cm** <sup>-1</sup> |
| 12: | 54.43 cm** <sup>-1</sup> |

## References

- 1 J. L. Beckmann, J. Krieft, Y. V. Vishnevskiy, B. Neumann, H.-G. Stammler and N. W. Mitzel, *Angew. Chem. Int. Ed.*, 2023, **62**, e202310439.
- 2 F. Eisenträger, A. Göthlich, I. Gruber, H. Heiss, C. A. Kiener, C. Krüger, J. U. Notheis, F. Rominger, G. Scherhag and M. Schultz, *New J. Chem.*, 2003, **27**, 540.
- 3 D.R. Williamson and M. C. Baird, *J. Inorg. Nucl. Chem.*, 1972, **34**, 3393–3400.
- 4 M. A. Beckett, G. C. Strickland, J. R. Holland and K. S. Varma, *Polymer*, 1996, **37**, 4629–4631; b) U. Mayer, V. Gutmann, and W. Gerger, *Monatsh. Chem.*, 1975, **106**, 1235–1257.
- 5 J. Ramler and C. Lichtenberg, *Chem. – Eur. J.*, 2020, **26**, 10250–10258.
- 6 O. V. Dolomanov, L. J. Bourhis, R. J. Gildea, J. A. K. Howard and H. Puschmann, *J. Appl. Crystallogr.*, 2009, **42**, 339–341.
- 7 G. M. Sheldrick, *Acta Crystallogr., Sect. A*, 2015, **71**, 3–8.
- 8 G. M. Sheldrick, *Acta Crystallogr., Sect. C*, 2015, **71**, 3–8.
- 9 L. J. Bourhis, O. V. Dolomanov, R. J. Gildea, J. A. K. Howard and H. Puschmann, *Acta Crystallogr.*, 2015, **A71**, 59–75.
- 10 F. Kleemiss, O. V. Dolomanov, M. Bodensteiner, N. Peyerimhoff, M. Midgley, L. J. Bourhis, A. Genoni, L. A. Malaspina, D. Jayatilaka, J. L. Spencer, F. White, B. Grundkötter-Stock, S. Steinhauer, D. Lentz, H. Puschmann and S. Grabowsky, *Chem. Sci.*, 2021, **12**, 1675–1692.
- 11 G. Schaftenaar and J. H. Noordik, *J. Comput.-Aided Mol. Des.*, 2000, **14**, 123–134.
- 12 G. Schaftenaar, E. Vlieg and G. Vriend, *J. Comput.-Aided Mol. Des.*, 2017, **31**, 789–800.
- 13 S. Grimme, C. Bannwarth and P. Shushkov, *J. Chem. Theory Comput.*, 2017, **13**, 1989–2009.
- 14 C. Bannwarth, S. Ehlert and S. Grimme, *J. Chem. Theory Comput.*, 2019, **15**, 1652–1671.
- 15 C. Bannwarth, E. Caldeweyher, S. Ehlert, A. Hansen, P. Pracht, J. Seibert, S. Spicher and S. Grimme, *Wiley Interdiscip. Rev.: Comput. Mol. Sci.*, 2021, **11**, e1493.
- 16 S. Grimme, *J. Chem. Theory Comput.*, 2019, **15**, 2847–2862.
- 17 P. Pracht, F. Bohle and S. Grimme, *Phys. Chem. Chem. Phys.*, 2020, **22**, 7169–7192.
- 18 S. Grimme, A. Hansen, S. Ehlert and J.-M. Mewes, *J. Chem. Phys.*, 2021, **154**, 064103.
- 19 J. W. Furness, A. D. Kaplan, J. Ning, J. P. Perdew and J. Sun, *J. Phys. Chem. Lett.*, 2020, **11**, 8208–8215.
- 20 J. W. Furness, A. D. Kaplan, J. Ning, J. P. Perdew and J. Sun, *J. Phys. Chem. Lett.*, 2020, **11**, 9248.
- 21 S. Ehlert, U. Huniar, J. Ning, J. W. Furness, J. Sun, A. D. Kaplan, J. P. Perdew and J. G. Brandenburg, *J. Chem. Phys.*, 2021, **154**, 061101.
- 22 H. Kruse and S. Grimme, *J. Chem. Phys.*, 2012, **136**, 154101.
- 23 B. Metz, H. Stoll and M. Dolg, *J. Chem. Phys.*, 2000, **113**, 2563–2569.
- 24 F. Neese, *Wiley Interdiscip. Rev. Comput. Mol. Sci.*, 2012, **2**, 73–78.

- 25 F. Neese, *Wiley Interdiscip. Rev. Comput. Mol. Sci.*, 2017, **8**, e1327.
- 26 F. Neese, F. Wennmohs, U. Becker and C. Riplinger, *J. Chem. Phys.*, 2020, **152**, 224108.
- 27 F. Neese, *Wiley Interdiscip. Rev.: Comput. Mol. Sci.*, 2022, **12**, e1606.
- 28 G. Herzberg, *Molecular Spectra and Molecular Structure. II. Infrared and Raman Spectra of Polyatomic Molecules*, Van Nostrand Comp., Toronto, 1945.
- 29 S. Grimme, *Chem. Eur. J.*, 2012, **18**, 9955–9964.
- 30 C. Adamo and V. Barone, *J. Chem. Phys.*, 1999, **110**, 6158–6170.
- 31 S. Grimme, S. Ehrlich and L. Goerigk, *J. Comput. Chem.*, 2011, **32**, 1456–1465.
- 32 F. Weigend and R. Ahlrichs, *Phys. Chem. Chem. Phys.*, 2005, **7**, 3297–3305.
- 33 F. Neese, F. Wennmohs, A. Hansen and U. Becker, *Chem. Phys.* 2009, **356**, 98–109.
- 34 M. J. Frisch, G. W. Trucks, H. B. Schlegel, G. E. Scuseria, M. A. Robb, J. R. Cheeseman, G. Scalmani, V. Barone, G. A. Petersson, H. Nakatsuji, X. Li, M. Caricato, A. V. Marenich, J. Bloino, B. G. Janesko, R. Gomperts, B. Mennucci, H. P. Hratchian, J. V. Ortiz, A. F. Izmaylov, J. L. Sonnenberg, D. Williams-Young, F. Ding, F. Lipparini, F. Egidi, J. Goings, B. Peng, A. Petrone, T. Henderson, D. Ranasinghe, V. G. Zakrzewski, J. Gao, N. Rega, G. Zheng, W. Liang, M. Hada, M. Ehara, K. Toyota, R. Fukuda, J. Hasegawa, M. Ishida, T. Nakajima, Y. Honda, O. Kitao, H. Nakai, T. Vreven, K. Throssell, J. A. Montgomery Jr., J. E. Peralta, F. Ogliaro, M. J. Bearpark, J. J. Heyd, E. N. Brothers, K. N. Kudin, V. N. Staroverov, T. A. Keith, R. Kobayashi, J. Normand, K. Raghavachari, A. P. Rendell, J. C. Burant, S. S. Iyengar, J. Tomasi, M. Cossi, J. M. Millam, M. Klene, C. Adamo, R. Cammi, J. W. Ochterski, R. L. Martin, K. Morokuma, O. Farkas, J. B. Foresman and D. J. Fox, *Gaussian 16 Revision C.01*, Gaussian Inc. Wallingford CT, 2016.
- 35 K. A. Todd, *AIMAll Version 19.10.12*, TK Gristmill Software, aim.tkgristmill.com, 2019.
- 36 R. F. W. Bader, *Atoms in Molecules - A Quantum Theory*, Oxford University Press, Oxford, 1990.
- 37 M. A. Blanco, A. Martín Pendás and E. Francisco, *J. Chem. Theory Comput.*, 2005, **1**, 1096–1109.
- 38 P. Erdmann, J. Leitner, J. Schwarz and L. Greb, *ChemPhysChem*, 2020, **21**, 987–994.
- 39 S. Grimme, J. G. Brandenburg, C. Bannwarth and A. Hansen, *J. Chem. Phys.*, 2015, **143**, 54107.
- 40 S. Grimme, J. Antony, S. Ehrlich and H. Krieg, *J. Chem. Phys.*, 2010, **132**, 154104.
- 41 F. Weigend, *Phys. Chem. Chem. Phys.*, 2006, **8**, 1057–1065.
- 42 S. Kozuch, D. Gruzman and J. M. L. Martin, *J. Phys. Chem. C*, 2010, **114**, 20801–20808.
- 43 A. Hellweg, C. Hättig, S. Höfener and W. Klopper, *Theor. Chem. Acc.*, 2007, **117**, 587–597.
